# Supplementary material for: Rh(iii)-Catalyzed C–C coupling of unactivated C(sp3)–H bonds with iodonium ylides for accessing all-carbon quaternary centers
Source: Royal Society of Chemistry journal article supplement (doi:10.1039/d2qo00667g), 2022-01-01
Supplement: d2qo00667g1.pdf [file d2qo00667g1.pdf]

## Supporting Information

# **Rh(III)-catalyzed C–C coupling of unactivated C(sp<sup>3</sup>)–H bonds with iodonium ylides for access to all-carbon quaternary carbon centers**

Pengfei Xie, Huixing Gao, Xingwei Li, Yuqin Jiang,\* and Bingxian Liu\*

*NMPA Key Laboratory for Research and Evaluation of Innovative Drug, Collaborative Innovation Center of Henan Province for Green Manufacturing of Fine Chemicals, School of Chemistry and Chemical Engineering, Henan Normal University, Xinxiang, Henan453007, China.*

E-mail: liubx1120@163.com

## Table of Contents

|                                            |           |
|--------------------------------------------|-----------|
| <b>1. General Information .....</b>        | <b>3</b>  |
| <b>2. Experimental Section .....</b>       | <b>3</b>  |
| <b>3. References .....</b>                 | <b>6</b>  |
| <b>4. Characterization Data .....</b>      | <b>7</b>  |
| <b>5. NMR Spectrum and HRMS Data .....</b> | <b>17</b> |

## 1. General Information

All chemicals were obtained from commercial sources and were used as received unless otherwise noted. All the reactions were carried out under Ar atmosphere. The  $^1\text{H}$  NMR spectra were recorded on a 400 MHz or 600 MHz NMR spectrometer. The  $^{13}\text{C}$  NMR spectra were recorded at 100 MHz or 150 MHz. The  $^{19}\text{F}$  NMR spectra were recorded at 376 MHz. Chemical shifts were expressed in parts per million ( $\delta$ ) downfield from the internal standard tetramethylsilane (TMS), and were reported as s (singlet), d (doublet), t (triplet), dd (doublets of doublet), dt (doublets of triplet), and m (multiplet). The residual solvent signals were used as references and the chemical shifts were converted to the TMS scale ( $\text{CDCl}_3$ :  $\delta \text{H} = 7.26$  ppm,  $\delta \text{C} = 77.16$  ppm,  $\text{DMSO-}d_6$ :  $\delta \text{H} = 2.50$  ppm,  $\delta \text{C} = 39.52$  ppm). The coupling constants  $J$  were given in Hz. High resolution mass spectra (HRMS) were obtained via ESI mode by using a MicroTOF mass spectrometer. The conversion of starting materials was monitored by thin layer chromatography (TLC) using silica gel plates (silica gel 60 F254 0.25 mm), and components were visualized by observation under UV light (254 and 365 nm). Column chromatography was performed on silica gel 200-300 mesh.

Pyridine derivatives<sup>1</sup> and iodonium ylides<sup>2</sup> were prepared according to the published procedures.

## 2. Experimental Section

### (1) General procedures for pyridine-assisted functionalization of unactivated $\text{C}(\text{sp}^3)\text{-H}$ bonds

A Schlenk tube with a magnetic stir bar was charged with pyridine derivatives (0.10 mmol), iodonium ylides (0.15 mmol),  $[\text{Cp}^*\text{RhCl}_2]_2$  (0.004 mmol, 4.0 mol %),  $\text{AgSbF}_6$  (16 mol %), 2,2-Dimethylbutyric acid (0.10 mmol),  $\text{K}_2\text{CO}_3$  (0.10 mmol),  $\text{NaOAc}$  (0.10 mmol) and HFIP (0.5 mL) under an  $\text{N}_2$  atmosphere. The resulting mixture was stirred at 100 °C for 12 h. After the solvent was removed under reduced pressure, the residue was purified by column chromatography on silica gel to provide the desired product.

### (2) Scale-up Synthesis of **3**

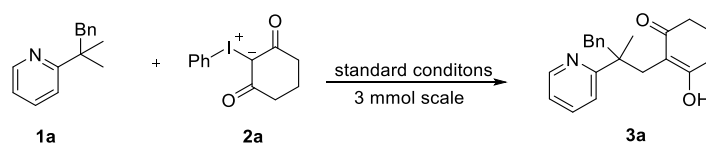

A Schlenk tube with a magnetic stir bar was charged with pyridine derivatives (3.00 mmol), iodonium ylides (4.50 mmol),  $[\text{Cp}^*\text{RhCl}_2]_2$  (0.120 mmol, 4.0 mol %),  $\text{AgSbF}_6$  (16 mol %), 2,2-Dimethylbutyric acid (3.0 mmol),  $\text{K}_2\text{CO}_3$  (3.0 mmol),  $\text{NaOAc}$  (3.0 mmol) and HFIP (15 mL) under an  $\text{N}_2$  atmosphere. The resulting mixture was stirred at 100 °C for 12 h. Afterwards, it was evaporated under reduced pressure, and the residue was purified by silica gel chromatography (petroleum ether:Acetone = 5:1) to afford **3a** (724.6 mg, 75%).

### (3) Diversification of the Products

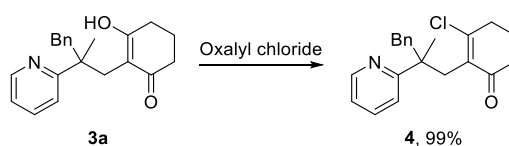

Compound **3** (0.1 mmol) was dissolved in oxalyl chloride (0.1 mL) and the reaction mixture was stirred at room temperature for 3 h. Then the reaction mixture was diluted with diethyl ether (3.0 mL) and washed with water (3.0 mL) and brine (3.0 mL). The filtrate was concentrated in vacuo, and the crude product was purified by silica gel chromatography (petroleum ether:ethyl acetate = 10:1).

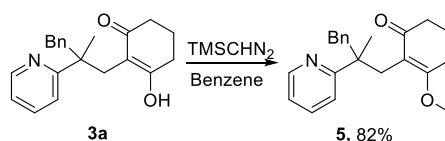

To a solution of the **3** (0.1 mmol) in benzene (2 mL) was dropwise added trimethylsilyldiazomethane (TMSCHN<sub>2</sub>, 0.15 mL, 0.3 mmol, 2.0 M solution in hexane) at r.t..The resulting mixture was stirred at room temperature for 12 h. The reaction was quenched by the addition of AcOH (10  $\mu$ L), and the solvent was removed by vaporation, and the crude product was purified by silica gel chromatography (petroleum ether:ethyl acetate = 1:1) to afford **5** (27.4 mg, 82%).

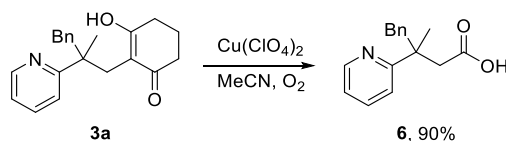

A Schlenk tube with a magnetic stir bar was charged with **3** (0.1 mmol), Cu(ClO<sub>4</sub>)<sub>2</sub> (0.15 mmol) and MeCN (0.5 mL) under an O<sub>2</sub> atmosphere. The resulting mixture was stirred at room temperature for 12 h. Afterwards, it was evaporated under reduced pressure, and the residue was purified by silica gel chromatography (MeOH:DCM = 1:20) to afford **6** (22.9 mg, 90%).

### (4) Mechanistic Studies

Synthesis of rhodacycle [Rh-Py] complex

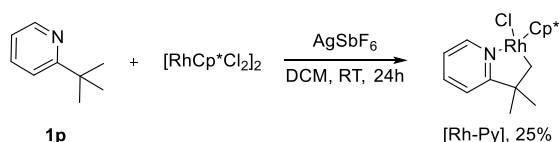

A Schlenk tube with a magnetic stir bar was charged with [RhCp\*Cl<sub>2</sub>]<sub>2</sub> (31.3 mg, 0.05 mmol), AgSbF<sub>6</sub> (70.4 mg, 0.20 mmol, 4 equiv), 2-(tert-butyl)pyridine (67.6  $\mu$ L, 0.50 mmol, 10 equiv), and CH<sub>2</sub>Cl<sub>2</sub> (0.75 mL) under an N<sub>2</sub> atmosphere. The resulting mixture was stirred at room temperature for 24 h and then diluted with 3 mL of dichloromethane. The solution was filtered through a celite pad and washed with

10-20 mL of dichloromethane. The filtrate was concentrated and the residue was purified by column chromatography on alumina to provide the complex as a orange solid.

[Rh-Py] complex catalyzed alkylation of 2-(tert-butyl)pyridine

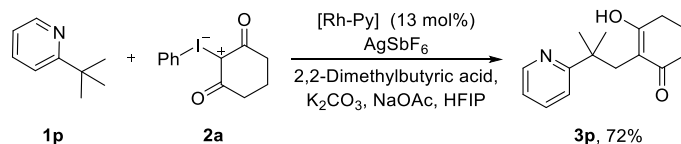

A Schlenk tube with a magnetic stir bar was charged with 2-(tert-butyl)pyridine (0.10 mmol), iodonium ylides (0.15 mmol), [Rh-Py] complex (0.013 mmol, 13.0 mol %), AgSbF<sub>6</sub> (13 mol %), 2,2-Dimethylbutyric acid (0.10 mmol), K<sub>2</sub>CO<sub>3</sub> (0.10 mmol), NaOAc (0.10 mmol) and HFIP (0.5 mL) under an N<sub>2</sub> atmosphere. The resulting mixture was stirred at 100 °C for 12 h. After the solvent was removed under reduced pressure, the residue was purified by column chromatography on silica gel to provide the desired product.

The reaction of stoichiometric amounts of [Rh-Py] complex with iodonium ylides

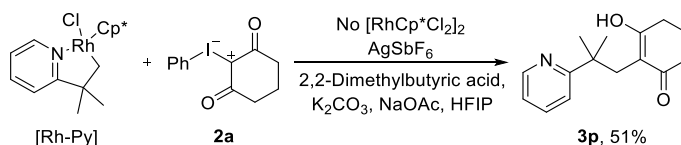

A Schlenk tube with a magnetic stir bar was charged with [Rh-Py] complex (0.05 mmol), iodonium ylides (0.075 mmol), AgSbF<sub>6</sub> (16 mol %), 2,2-Dimethylbutyric acid (0.05 mmol), K<sub>2</sub>CO<sub>3</sub> (0.05 mmol), NaOAc (0.05 mmol) and HFIP (0.25 mL) under an N<sub>2</sub> atmosphere. The resulting mixture was stirred at 100 °C for 12 h. After the solvent was removed under reduced pressure, the residue was purified by column chromatography on silica gel to provide the desired product.

H/D Exchange experiment

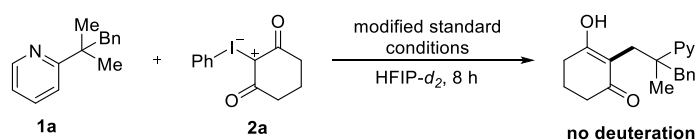

A Schlenk tube with a magnetic stir bar was charged with **1a** (0.10 mmol), **2a** (0.15 mmol), [Cp\*<sup>+</sup>RhCl<sub>2</sub>]<sup>-</sup> (0.004 mmol, 4.0 mol %), AgSbF<sub>6</sub> (16 mol %), AdCOOD (0.10 mmol), K<sub>2</sub>CO<sub>3</sub> (0.10 mmol), NaOAc (0.10 mmol) and HFIP-*d*<sub>2</sub> (0.5 mL) under an N<sub>2</sub> atmosphere. The resulting mixture was stirred at 100 °C for 8 h. After the solvent was removed under reduced pressure, the residue was purified by column chromatography on silica gel to provide the desired product, giving the product in 80% yield.



#### 4. Characterization Data

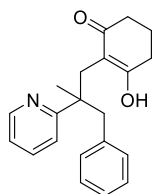

3-hydroxy-2-(2-methyl-3-phenyl-2-(pyridin-2-yl)propyl)cyclohex-2-en-1-one (**3a**).

Yellow solid (28.2 mg, 88%, m.p. 78 - 79 °C), eluent: PE/Acetone = 5:1. <sup>1</sup>H NMR (600 MHz, Chloroform-*d*) δ 14.26 (s, 1H), 8.76 – 8.00 (m, 1H), 7.64 (td, *J* = 7.8, 1.9 Hz, 1H), 7.23 (ddd, *J* = 7.4, 5.1, 1.1 Hz, 1H), 7.13 (d, *J* = 8.2 Hz, 1H), 7.10 – 7.06 (m, 1H), 7.03 (dd, *J* = 8.2, 6.6 Hz, 2H), 2.99 – 2.77 (m, 4H), 2.55 – 2.29 (m, 4H), 1.92 – 1.89 (m, 2H), 1.45 (s, 3H). <sup>13</sup>C NMR (150 MHz, Chloroform-*d*) δ 199.5, 176.0, 166.7, 145.9, 137.9, 137.6, 130.3, 127.6, 126.2, 123.4, 121.9, 112.8, 50.4, 46.7, 37.2, 32.0, 30.4, 26.4, 21.1. HRMS (ESI-TOF) *m/z*: [M + H]<sup>+</sup> Calcd for C<sub>21</sub>H<sub>24</sub>NO<sub>2</sub><sup>+</sup> 322.1802, Found: 322.1804.

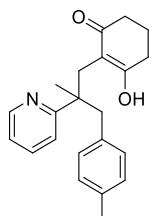

3-hydroxy-2-(2-methyl-2-(pyridin-2-yl)-3-(p-tolyl)propyl)cyclohex-2-en-1-one (**3b**).

Red oil (24.1 mg, 72%), eluent: PE/Acetone = 5:1. <sup>1</sup>H NMR (400 MHz, Chloroform-*d*) δ 8.43 (dd, *J* = 5.1, 1.7 Hz, 1H), 7.64 (td, *J* = 7.8, 1.9 Hz, 1H), 7.23 (ddd, *J* = 7.5, 5.0, 1.0 Hz, 1H), 7.15 (d, *J* = 8.1 Hz, 1H), 6.85 (d, *J* = 7.7 Hz, 2H), 6.42 (d, *J* = 7.9 Hz, 2H), 2.97 – 2.78 (m, 4H), 2.39 (m, 4H), 2.23 (s, 3H), 1.95 – 1.85 (m, 2H), 1.43 (s, 3H). <sup>13</sup>C NMR (100 MHz, Chloroform-*d*) δ 199.5, 176.0, 166.9, 145.9, 137.5, 135.6, 134.7, 130.2, 128.3, 123.5, 121.9, 112.9, 50.1, 46.7, 37.2, 31.8, 30.4, 26.4, 21.1. HRMS (ESI-TOF) *m/z*: [M + H]<sup>+</sup> Calcd for C<sub>22</sub>H<sub>26</sub>NO<sub>2</sub><sup>+</sup> 336.1958, Found: 336.1961.

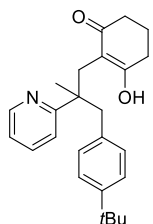

2-(3-(4-(tert-butyl)phenyl)-2-methyl-2-(pyridin-2-yl)propyl)-3-hydroxycyclohex-2-en-1-one (**3c**).

Colorless oil (26.4 mg, 70%), eluent: PE/Acetone = 5:1. <sup>1</sup>H NMR (400 MHz, Chloroform-*d*) δ 14.27 (s, 1H), 8.43 (ddd, *J* = 5.1, 1.9, 0.9 Hz, 1H), 7.68 – 7.62 (m, 1H), 7.26 – 7.22 (m, 1H), 7.19 (d, *J* = 8.2 Hz, 1H), 7.07 – 7.03 (m, 2H), 6.50 – 6.42 (m, 2H), 2.93 – 2.81 (m, 4H), 2.46 – 2.33 (m, 4H), 1.93 – 1.87 (m, 2H), 1.44 (s, 3H), 1.23 (s, 9H). <sup>13</sup>C NMR (150 MHz, Chloroform-*d*) δ 199.5, 175.9, 166.9, 149.0, 145.8, 137.6, 134.7, 129.9, 124.5, 123.5, 121.9, 112.9, 50.1, 46.8, 37.2, 34.4, 31.7, 31.4, 30.4, 26.6, 21.1. HRMS (ESI-TOF) *m/z*: [M + H]<sup>+</sup> Calcd for C<sub>25</sub>H<sub>32</sub>NO<sub>2</sub><sup>+</sup> 378.2428, Found: 378.2425.

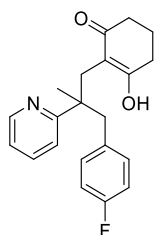

2-(3-(4-fluorophenyl)-2-methyl-2-(pyridin-2-yl)propyl)-3-hydroxycyclohex-2-en-1-one (**3d**).

Yellow oil (27.1 mg, 80%), eluent: PE/Acetone = 5:1.  $^1\text{H}$  NMR (400 MHz, Chloroform-*d*)  $\delta$  8.44 (d,  $J$  = 3.6 Hz, 1H), 7.65 (td,  $J$  = 7.8, 1.9 Hz, 1H), 7.24 (ddd,  $J$  = 7.5, 5.1, 1.1 Hz, 1H), 7.12 (d,  $J$  = 8.1 Hz, 1H), 6.72 (t,  $J$  = 8.7 Hz, 2H), 6.47 (dd,  $J$  = 8.5, 5.6 Hz, 2H), 2.95 – 2.80 (m, 4H), 2.43 – 2.36 (m, 4H), 1.95 – 1.86 (m, 2H), 1.43 (s, 3H).  $^{13}\text{C}$  NMR (100 MHz, Chloroform-*d*)  $\delta$  199.4, 176.0, 166.5, 161.5 (d,  $J$  = 244.3 Hz), 146.0, 137.6, 133.5 (d,  $J$  = 3.5 Hz), 131.5 (d,  $J$  = 7.9 Hz), 123.3, 122.0, 114.4 (d,  $J$  = 20.9 Hz), 112.6, 49.4, 46.6, 37.2, 31.9, 30.3, 26.2, 21.0.  $^{19}\text{F}$  NMR (377 MHz, Chloroform-*d*)  $\delta$  -117.09. HRMS (ESI-TOF)  $m/z$ :  $[\text{M} + \text{H}]^+$  Calcd for  $\text{C}_{21}\text{H}_{23}\text{FNO}_2^+$  340.1707, Found: 340.1702.

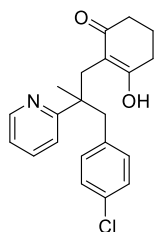

2-(3-(4-chlorophenyl)-2-methyl-2-(pyridin-2-yl)propyl)-3-hydroxycyclohex-2-en-1-one (**3e**).

Red oil (23.8 mg, 71%), eluent: PE/Acetone = 5:1.  $^1\text{H}$  NMR (600 MHz, Chloroform-*d*)  $\delta$  14.02 (s, 1H), 8.45 (dd,  $J$  = 5.2, 1.7 Hz, 1H), 7.66 (td,  $J$  = 7.8, 1.8 Hz, 1H), 7.26 – 7.23 (m, 1H), 7.13 (d,  $J$  = 8.2 Hz, 1H), 7.01 (d,  $J$  = 8.4 Hz, 2H), 6.44 (d,  $J$  = 8.4 Hz, 2H), 2.93 – 2.82 (m, 4H), 2.47 – 2.34 (m, 4H), 1.94 – 1.88 (m, 2H), 1.44 (s, 3H).  $^{13}\text{C}$  NMR (150 MHz, Chloroform-*d*)  $\delta$  199.3, 175.9, 166.3, 146.0, 137.5, 136.2, 132.0, 131.4, 127.6, 123.1, 121.9, 112.5, 49.5, 46.4, 37.1, 31.9, 30.2, 26.1, 20.9. HRMS (ESI-TOF)  $m/z$ :  $[\text{M} + \text{H}]^+$  Calcd for  $\text{C}_{21}\text{H}_{23}\text{ClNO}_2^+$  356.1412, Found: 356.1400.

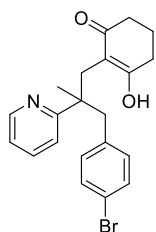

2-(3-(4-bromophenyl)-2-methyl-2-(pyridin-2-yl)propyl)-3-hydroxycyclohex-2-en-1-one (**3f**).

Colorless oil (30.7 mg, 77%), eluent: PE/Acetone = 5:1.  $^1\text{H}$  NMR (400 MHz, Chloroform-*d*)  $\delta$  14.07 (s, 1H), 8.45 (d,  $J$  = 3.4 Hz, 1H), 7.67 (td,  $J$  = 7.8, 1.9 Hz, 1H), 7.27 – 7.23 (m, 1H), 7.17 (s, 1H), 7.16 – 7.13 (m, 2H), 6.39 (d,  $J$  = 8.3 Hz, 2H), 2.94 – 2.82 (m, 4H), 2.47 – 2.34 (m, 4H), 1.95 – 1.88 (m, 2H), 1.44 (s, 3H).  $^{13}\text{C}$  NMR (150 MHz, Chloroform-*d*)  $\delta$  199.4, 176.0, 166.3, 146.1, 137.7, 136.8, 131.9, 130.7, 123.2, 122.0, 120.2, 112.5, 49.6, 46.4, 37.1, 31.9, 30.3, 26.2, 21.0. HRMS (ESI-TOF)  $m/z$ :  $[\text{M} + \text{H}]^+$  Calcd for  $\text{C}_{21}\text{H}_{24}\text{BrNO}_2^+$  400.0907, Found: 400.0895.



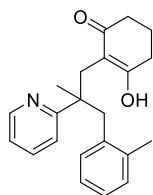

3-hydroxy-2-(2-methyl-2-(pyridin-2-yl)-3-(o-tolyl)propyl)cyclohex-2-en-1-one (**3g**).

Brown oil (29.2 mg, 87%), eluent: PE/Acetone = 5:1.  $^1\text{H}$  NMR (400 MHz, Chloroform-*d*)  $\delta$  8.48 (d,  $J$  = 3.9 Hz, 1H), 7.53 (td,  $J$  = 7.9, 1.9 Hz, 1H), 7.24 (ddd,  $J$  = 7.4, 5.1, 1.1 Hz, 1H), 7.05 – 7.00 (m, 1H), 6.96 (dd,  $J$  = 7.7, 1.6 Hz, 1H), 6.91 (td,  $J$  = 7.4, 1.6 Hz, 1H), 6.82 (d,  $J$  = 8.2 Hz, 1H), 6.49 (dd,  $J$  = 7.7, 1.3 Hz, 1H), 3.12 – 3.08 (m, 1H), 2.94 – 2.84 (m, 3H), 2.49 – 2.33 (m, 4H), 1.96 – 1.88 (m, 2H), 1.74 (s, 3H), 1.46 (s, 3H).  $^{13}\text{C}$  NMR (100 MHz, Chloroform-*d*)  $\delta$  199.3, 175.9, 166.4, 145.9, 137.6, 137.3, 136.1, 131.0, 130.0, 126.2, 124.9, 123.5, 121.9, 112.8, 47.0, 45.1, 37.1, 32.7, 30.2, 26.4, 20.9, 19.4. HRMS (ESI-TOF)  $m/z$ :  $[\text{M} + \text{H}]^+$  Calcd for  $\text{C}_{21}\text{H}_{26}\text{NO}_2^+$  336.1958, Found: 336.1961.

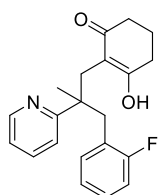

2-(3-(2-fluorophenyl)-2-methyl-2-(pyridin-2-yl)propyl)-3-hydroxycyclohex-2-en-1-one (**3h**).

Dark red oil (24.8 mg, 73%), eluent: PE/Acetone = 5:1.  $^1\text{H}$  NMR (400 MHz, Chloroform-*d*)  $\delta$  14.24 (s, 1H), 8.45 (d,  $J$  = 3.5 Hz, 1H), 7.63 (td,  $J$  = 7.8, 1.8 Hz, 1H), 7.28 – 7.24 (m, 1H), 7.12 – 7.05 (m, 2H), 6.86 (td,  $J$  = 7.5, 1.2 Hz, 1H), 6.79 (dd,  $J$  = 9.6, 8.1, 1H), 6.62 (td,  $J$  = 7.6, 1.8 Hz, 1H), 3.05 – 2.86 (m, 4H), 2.46 – 2.33 (m, 4H), 1.93 – 1.87 (m, 2H), 1.45 (s, 3H). NMR (150 MHz, Chloroform-*d*)  $\delta$  199.2, 175.9, 166.2, 162.5 (d,  $J$  = 242.4 Hz), 145.9, 140.2 (d,  $J$  = 6.9 Hz), 137.4, 128.8 (d,  $J$  = 8.7 Hz), 125.8, 123.0, 121.9, 116.7 (d,  $J$  = 20.8 Hz), 112.9 (d,  $J$  = 20.8 Hz), 112.4, 49.9, 46.4, 37.0, 31.7, 30.1, 26.2, 20.8.  $^{19}\text{F}$  NMR (565 MHz, Chloroform-*d*)  $\delta$  -115.88. HRMS (ESI-TOF)  $m/z$ :  $[\text{M} + \text{H}]^+$  Calcd for  $\text{C}_{21}\text{H}_{23}\text{FNO}_2^+$  340.1707, Found: 340.1703.

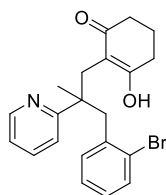

2-(3-(2-bromophenyl)-2-methyl-2-(pyridin-2-yl)propyl)-3-hydroxycyclohex-2-en-1-one (**3i**).

Yellow solid (23.5 mg, 59%, m.p. 75 - 76 °C), eluent: PE/Acetone = 5:1.  $^1\text{H}$  NMR (600 MHz, Chloroform-*d*)  $\delta$  14.45 (s, 1H), 8.47 (d,  $J$  = 3.4 Hz, 1H), 7.55 (td,  $J$  = 7.8, 1.8 Hz, 1H), 7.37 (d,  $J$  = 6.6 Hz, 1H), 7.26 – 7.23 (m, 1H), 7.06 (td,  $J$  = 7.5, 1.3 Hz, 1H), 6.98 (td,  $J$  = 7.7, 1.7 Hz, 1H), 6.85 (d,  $J$  = 8.1 Hz, 1H), 6.69 (dd,  $J$  = 7.6, 1.7 Hz, 1H), 3.11 – 2.95 (m, 4H), 2.50 – 2.41 (m, 2H), 2.39 – 2.34 (m, 2H), 1.94 – 1.89 (m, 2H), 1.49 (s, 3H).  $^{13}\text{C}$  NMR (150 MHz, Chloroform-*d*)  $\delta$  199.4, 176.3, 165.8, 146.0, 137.7, 137.6, 132.8, 132.3, 127.9, 126.9, 126.6, 123.5, 122.2, 112.6, 47.6, 47.1, 37.2, 32.5, 30.4, 26.5, 21.0. HRMS (ESI-TOF)  $m/z$ :  $[\text{M} + \text{H}]^+$  Calcd for  $\text{C}_{21}\text{H}_{23}\text{BrNO}_2^+$  400.0907, Found: 400.0897.

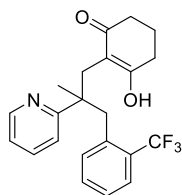

3-hydroxy-2-(2-methyl-2-(pyridin-2-yl)-3-(2-(trifluoromethyl)phenyl)propyl)cyclohex-2-en-1-one (**3j**). Yellow solid (21.8 mg, 56%, m.p. 109 - 110 °C), eluent: PE/Acetone = 5:1. <sup>1</sup>H NMR (600 MHz, Chloroform-*d*) δ 14.38 (s, 1H), 8.54 – 8.43 (m, 1H), 7.56 – 7.50 (m, 2H), 7.30 – 7.19 (m, 3H), 6.86 (d, *J* = 8.1 Hz, 1H), 6.76 (d, *J* = 7.5 Hz, 1H), 3.21 (m, 2H), 3.02 – 2.93 (m, 2H), 2.41 (m, 4H), 1.94 – 1.90 (m, 2H), 1.45 (s, 3H). <sup>13</sup>C NMR (150 MHz, Chloroform-*d*) δ 199.3, 176.1, 166.4, 146.0, 137.7, 137.1, 132.0, 130.8, 129.8 (q, *J* = 28.9 Hz), 126.4, 126.3 (q, *J* = 5.9 Hz), 124.3 (q, *J* = 274.2 Hz), 123.1, 121.5, 112.7, 46.8, 44.2, 37.2, 32.5, 30.4, 27.8, 21.0. <sup>19</sup>F NMR (565 MHz, Chloroform-*d*) δ -58.44. HRMS (ESI-TOF) *m/z*: [M + H]<sup>+</sup> Calcd for C<sub>22</sub>H<sub>23</sub>F<sub>3</sub>NO<sub>2</sub><sup>+</sup> 390.1675, Found: 390.1674.

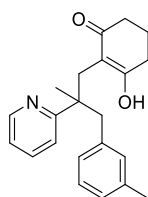

3-hydroxy-2-(2-methyl-2-(pyridin-2-yl)-3-(m-tolyl)propyl)cyclohex-2-en-1-one (**3k**). Colorless oil (29.2 mg, 87%), eluent: PE/Acetone = 5:1. <sup>1</sup>H NMR (400 MHz, Chloroform-*d*) δ 14.19 (s, 1H), 8.44 (d, *J* = 4.2 Hz, 1H), 7.65 (td, *J* = 7.8, 1.9 Hz, 1H), 7.24 (ddd, *J* = 7.4, 5.3, 1.3 Hz, 1H), 7.15 (d, *J* = 8.1 Hz, 1H), 6.93 – 6.87 (m, 2H), 6.33 (s, 1H), 6.29 (dt, *J* = 6.9, 2.0 Hz, 1H), 2.92 – 2.81 (m, 4H), 2.43 – 2.35 (m, 4H), 2.14 (s, 3H), 1.94 – 1.87 (m, 2H), 1.44 (s, 3H). <sup>13</sup>C NMR (150 MHz, Chloroform-*d*) δ 199.5, 176.0, 166.9, 145.8, 137.7, 137.4, 137.0, 131.2, 127.4, 127.2, 126.9, 123.5, 121.8, 112.8, 50.4, 46.7, 37.2, 31.9, 30.4, 26.4, 21.3, 21.1. HRMS (ESI-TOF) *m/z*: [M + H]<sup>+</sup> Calcd for C<sub>22</sub>H<sub>26</sub>NO<sub>2</sub><sup>+</sup> 336.1958, Found: 336.1955.

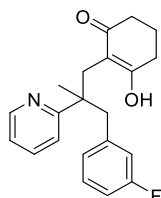

2-(3-(3-fluorophenyl)-2-methyl-2-(pyridin-2-yl)propyl)-3-hydroxycyclohex-2-en-1-one (**3l**). Brown solid (28.2 mg, 83%, m.p. 111 - 112 °C), eluent: PE/Acetone = 5:1. <sup>1</sup>H NMR (600 MHz, Chloroform-*d*) δ 14.11 (s, 1H), 8.46 (dd, *J* = 5.2, 1.7 Hz, 1H), 7.68 (td, *J* = 7.8, 1.8 Hz, 1H), 7.28 – 7.25 (m, 1H), 7.17 (d, *J* = 8.1 Hz, 1H), 7.01 (td, *J* = 8.0, 6.2 Hz, 1H), 6.79 (td, *J* = 8.5, 2.5 Hz, 1H), 6.37 (d, *J* = 7.6 Hz, 1H), 6.16 (dt, *J* = 10.3, 2.0 Hz, 1H), 2.96 – 2.83 (m, 4H), 2.49 – 2.33 (m, 4H), 1.94 – 1.89 (m, 2H), 1.46 (s, 3H). <sup>13</sup>C NMR (150 MHz, Chloroform-*d*) δ 199.4, 176.0, 166.3, 162.2 (d, *J* = 245.3 Hz), 146.1, 140.4 (d, *J* = 6.8 Hz), 137.7, 128.9 (d, *J* = 8.7 Hz), 126.0 (d, *J* = 2.3 Hz), 123.2, 122.1, 116.8 (d, *J* = 20.9 Hz), 113.1 (d, *J* = 20.9 Hz), 112.6, 50.0, 46.6, 37.1, 31.9, 30.3, 26.3, 21.0. <sup>19</sup>F NMR (376 MHz, Chloroform-*d*) δ -114.36. HRMS (ESI-TOF) *m/z*: [M + H]<sup>+</sup> Calcd for C<sub>21</sub>H<sub>23</sub>FNO<sub>2</sub><sup>+</sup> 340.1707, Found: 340.1707.

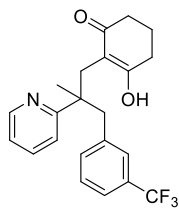

3-hydroxy-2-(2-methyl-2-(pyridin-2-yl)-3-(3-(trifluoromethyl)phenyl)propyl)cyclohex-2-en-1-one  
(**3m**).

Dark red oil (26.5 mg, 68%), eluent: PE/Acetone = 5:1.  $^1\text{H}$  NMR (400 MHz, Chloroform-*d*)  $\delta$  8.46 (dd,  $J = 5.6, 1.6$  Hz, 1H), 7.65 (td,  $J = 7.8, 1.8$  Hz, 1H), 7.37 – 7.32 (m, 1H), 7.28 – 7.24 (m, 1H), 7.20 (t,  $J = 7.7$  Hz, 1H), 7.09 (d,  $J = 8.2$  Hz, 1H), 6.87 (d,  $J = 7.7$  Hz, 1H), 6.49 (s, 1H), 2.96 – 2.84 (m, 4H), 2.44 – 2.34 (m, 4H), 1.94 – 1.88 (m, 2H), 1.46 (s, 3H).  $^{13}\text{C}$  NMR (150 MHz, Chloroform-*d*)  $\delta$  199.5, 176.1, 166.1, 146.2, 138.8, 137.7, 133.7, 129.8 (q,  $J = 31.8$  Hz), 128.0, 126.6 (q,  $J = 3.4$  Hz), 124.1 (d,  $J = 271.7$  Hz), 123.0 (q,  $J = 3.8$  Hz), 122.2, 112.5, 106.1, 50.0, 46.5, 37.1, 32.0, 30.3, 26.1, 21.0.  $^{19}\text{F}$  NMR (377 MHz, Chloroform-*d*)  $\delta$  -62.80. HRMS (ESI-TOF)  $m/z$ :  $[\text{M} + \text{H}]^+$  Calcd for  $\text{C}_{22}\text{H}_{23}\text{F}_3\text{NO}_2^+$  390.1675, Found: 390.1678.

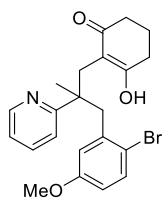

2-(3-(2-bromo-5-methoxyphenyl)-2-methyl-2-(pyridin-2-yl)propyl)-3-hydroxycyclohex-2-en-1-one  
(**3n**).

Yellow oil (29.1 mg, 68%), eluent: PE/Acetone = 5:1.  $^1\text{H}$  NMR (400 MHz, Chloroform-*d*)  $\delta$  14.31 (s, 1H), 8.49 (ddd,  $J = 5.1, 1.9, 0.9$  Hz, 1H), 7.65 – 7.46 (m, 1H), 7.32 – 7.17 (m, 2H), 6.93 (d,  $J = 8.1$  Hz, 1H), 6.57 (dd,  $J = 8.8, 3.0$  Hz, 1H), 6.17 (d,  $J = 3.0$  Hz, 1H), 3.60 (s, 3H), 3.14 – 2.89 (m, 4H), 2.42 (m, 4H), 1.94 – 1.91 (m, 2H), 1.51 (s, 3H).  $^{13}\text{C}$  NMR (100 MHz, Chloroform-*d*)  $\delta$  199.4, 176.3, 166.0, 158.1, 146.1, 138.6, 137.8, 133.2, 123.6, 122.2, 117.4, 117.2, 114.4, 112.7, 55.3, 47.9, 47.2, 37.2, 32.6, 30.5, 26.6, 21.1. HRMS (ESI-TOF)  $m/z$ :  $[\text{M} + \text{H}]^+$  Calcd for  $\text{C}_{22}\text{H}_{25}\text{BrNO}_3^+$  430.1012, Found: 430.1007.

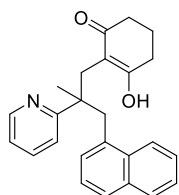

3-hydroxy-2-(2-methyl-3-(naphthalen-1-yl)-2-(pyridin-2-yl)propyl)cyclohex-2-en-1-one (**3o**).

White solid (25.2 mg, 68%, m.p. 49 - 50 °C), eluent: PE/Acetone = 5:1.  $^1\text{H}$  NMR (400 MHz, Chloroform-*d*)  $\delta$  14.51 (s, 1H), 8.48 (dd,  $J = 5.1, 1.8$  Hz, 1H), 7.71 (dd,  $J = 8.1, 1.3$  Hz, 1H), 7.63 (d,  $J = 8.2$  Hz, 1H), 7.43 (d,  $J = 8.6$  Hz, 1H), 7.30 (ddd,  $J = 8.1, 6.6, 1.1$  Hz, 1H), 7.26 – 7.15 (m, 3H), 7.12 (ddd,  $J = 7.5, 5.1, 1.1$  Hz, 1H), 6.73 – 6.64 (m, 1H), 6.59 (d,  $J = 8.1$  Hz, 1H), 3.31 – 3.30 (m, 2H), 3.22 – 3.18 (m, 1H), 3.00 – 2.96 (m, 1H), 2.55 – 2.34 (m, 4H), 1.97 – 1.90 (m, 2H), 1.49 (s, 3H).  $^{13}\text{C}$  NMR (150 MHz, Chloroform-*d*)  $\delta$  199.4, 176.1, 166.3, 145.9, 137.1, 134.2, 133.4, 133.2, 128.6, 128.3, 126.9, 125.3, 124.9, 124.6, 124.0, 123.5, 121.8, 112.8, 46.9, 44.1, 37.1, 33.4, 30.3, 26.7, 21.0. HRMS (ESI-TOF)  $m/z$ :  $[\text{M} + \text{H}]^+$  Calcd for  $\text{C}_{25}\text{H}_{26}\text{NO}_2^+$  372.1958, Found: 372.1958.

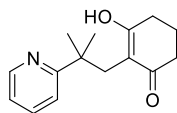

3-hydroxy-2-(2-methyl-2-(pyridin-2-yl)propyl)cyclohex-2-en-1-one (**3p**).

Yellow oil (17.7 mg, 72%), eluent: PE/Acetone = 4:1. <sup>1</sup>H NMR (400 MHz, Chloroform-*d*) δ 14.19 (s, 1H), 8.40 (dd, *J* = 5.1, 1.9, 1H), 7.74 (ddd, *J* = 8.1, 7.4, 1.9 Hz, 1H), 7.48 (dt, *J* = 8.2, 1.1 Hz, 1H), 7.21 (dd, *J* = 7.5, 5.1 Hz, 1H), 2.82 (m, 2H), 2.39 (m, 4H), 1.93 – 1.87 (m, 2H), 1.31 (s, 6H). <sup>13</sup>C NMR (150 MHz, Chloroform-*d*) δ 199.5, 175.9, 169.4, 145.6, 138.4, 122.0, 121.7, 113.4, 42.8, 37.2, 32.3, 30.4, 21.1. HRMS (ESI-TOF) *m/z*: [M + H]<sup>+</sup> Calcd for C<sub>15</sub>H<sub>20</sub>NO<sub>2</sub><sup>+</sup> 246.1489, Found: 246.1491.

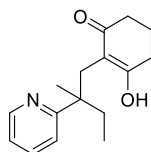

3-hydroxy-2-(2-methyl-2-(pyridin-2-yl)butyl)cyclohex-2-en-1-one (**3q**).

Yellow solid (21.5 mg, 83%, m.p. 57 - 58 °C), eluent: PE/Acetone = 5:1. <sup>1</sup>H NMR (400 MHz, Chloroform-*d*) δ 8.43 (dd, *J* = 5.2, 1.9 Hz, 1H), 7.75 (ddd, *J* = 8.2, 7.4, 1.9 Hz, 1H), 7.43 (dt, *J* = 8.2, 1.0 Hz, 1H), 7.22 (dd, *J* = 7.4, 5.2 Hz, 1H), 2.89 – 2.79 (m, 2H), 2.43 – 2.34 (m, 4H), 1.94 – 1.87 (m, 2H), 1.84 – 1.87 (m, 2H), 1.25 (s, 3H), 0.64 (t, *J* = 7.5 Hz, 3H). <sup>13</sup>C NMR (150 MHz, Chloroform-*d*) δ 199.4, 175.8, 167.9, 145.6, 138.1, 122.5, 121.6, 113.1, 46.0, 37.8, 37.2, 30.5, 29.9, 27.3, 21.1, 8.9. HRMS (ESI-TOF) *m/z*: [M + H]<sup>+</sup> Calcd for C<sub>16</sub>H<sub>22</sub>NO<sub>2</sub><sup>+</sup> 260.1645, Found: 260.1640.

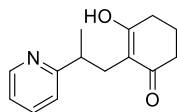

3-hydroxy-2-(2-(pyridin-2-yl)propyl)cyclohex-2-en-1-one (**3r**).

Yellow oil (6.9 mg, 30%), eluent: PE/Acetone = 3:1. <sup>1</sup>H NMR (600 MHz, Chloroform-*d*) δ 8.42 (d, *J* = 4.4 Hz, 1H), 7.70 (td, *J* = 7.7, 1.8 Hz, 1H), 7.28 (d, *J* = 8.0 Hz, 1H), 7.22 – 7.19 (m, 1H), 3.32 – 3.26 (m, 1H), 2.84 – 2.80 (m, 1H), 2.65 – 2.62 (m, 1H), 2.35 (m, 4H), 1.91 – 1.87 (m, 2H), 1.28 (d, *J* = 7.2 Hz, 3H). <sup>13</sup>C NMR (150 MHz, Chloroform-*d*) δ 207.1, 177.2, 165.6, 146.4, 138.1, 124.2, 121.8, 114.4, 40.4, 26.7, 23.3, 20.8. HRMS (ESI-TOF) *m/z*: [M + H]<sup>+</sup> Calcd for C<sub>14</sub>H<sub>18</sub>NO<sub>2</sub><sup>+</sup> 232.1332, Found: 232.1333.

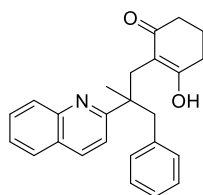

3-hydroxy-2-(2-methyl-3-phenyl-2-(quinolin-2-yl)propyl)cyclohex-2-en-1-one (**3s**).

Yellow solid (19.3 mg, 52%, m.p. 139 - 140 °C), eluent: PE/Acetone = 5:1. <sup>1</sup>H NMR (600 MHz, Chloroform-*d*) δ 14.37 (s, 1H), 8.12 (d, *J* = 8.6 Hz, 2H), 7.84 (dd, *J* = 8.1, 1.4 Hz, 1H), 7.76 (ddd, *J* = 8.4, 6.8, 1.4 Hz, 1H), 7.59 (ddd, *J* = 8.0, 6.8, 1.0 Hz, 1H), 7.39 (d, *J* = 8.8 Hz, 1H), 7.09 – 7.04 (m, 1H), 6.99 (t, *J* = 7.5 Hz, 2H), 6.59 (dd, *J* = 7.8, 1.3 Hz, 2H), 3.15 – 3.04 (m, 2H), 3.03 – 2.97 (m, 2H), 2.39 – 2.38 (m, 4H), 1.91 – 1.89 (m, 2H), 1.54 (s, 3H). <sup>13</sup>C NMR (150 MHz, Chloroform-*d*) δ 199.3, 175.8, 167.6, 144.8, 137.6, 137.2, 130.4, 130.1, 127.6, 127.5, 126.8, 126.7, 126.7, 126.1, 120.9, 112.7, 50.9, 47.6, 37.1, 30.8, 30.2, 26.2, 21.0. HRMS (ESI-TOF) *m/z*: [M + H]<sup>+</sup> Calcd for C<sub>25</sub>H<sub>26</sub>NO<sub>2</sub><sup>+</sup> 372.1958, Found: 372.1961.

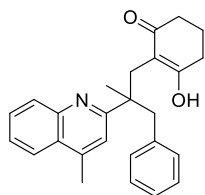

3-hydroxy-2-(2-methyl-2-(4-methylquinolin-2-yl)-3-phenylpropyl)cyclohex-2-en-1-one (**3t**).

White solid (20.0 mg, 57%, m.p. 159 - 160 °C), eluent: PE/Acetone = 5:1. <sup>1</sup>H NMR (600 MHz, Chloroform-*d*) δ 14.82 (s, 1H), 8.12 (d, *J* = 8.4 Hz, 1H), 7.99 (dd, *J* = 8.5, 1.3 Hz, 1H), 7.74 (ddd, *J* = 8.3, 6.8, 1.3 Hz, 1H), 7.60 (ddd, *J* = 8.2, 6.9, 1.2 Hz, 1H), 7.18 (s, 1H), 7.10 – 7.04 (m, 1H), 7.00 (t, *J* = 7.5 Hz, 2H), 6.64 – 6.55 (m, 2H), 3.16 – 3.02 (m, 1H), 3.00 – 2.95 (m, 2H), 2.66 (s, 3H), 2.47 – 2.35 (m, 4H), 1.91 – 1.86 (m, 2H), 1.52 (s, 3H). <sup>13</sup>C NMR (150 MHz, Chloroform-*d*) δ 199.4, 176.1, 167.0, 145.7, 144.6, 137.8, 130.2, 130.1, 127.6, 127.2, 127.8, 126.6, 126.2, 123.8, 121.6, 112.7, 50.9, 47.5, 37.2, 30.7, 30.4, 26.3, 21.1, 19.1. HRMS (ESI-TOF) *m/z*: [M + H]<sup>+</sup> Calcd for C<sub>26</sub>H<sub>28</sub>NO<sub>2</sub><sup>+</sup> 386.2115, Found: 386.2116.

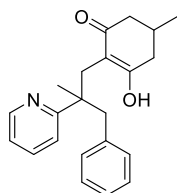

3-hydroxy-5-methyl-2-(2-methyl-3-phenyl-2-(pyridin-2-yl)propyl)cyclohex-2-en-1-one (**3u**).

Yellow oil (25.1 mg, 75%), eluent: PE/Acetone = 5:1. <sup>1</sup>H NMR (600 MHz, Chloroform-*d*) δ 14.18 (s, 1H), 8.42 (dd, *J* = 36.2, 5.0 Hz, 1H), 7.63 (dt, *J* = 31.2, 7.8 Hz, 1H), 7.24 – 7.19 (m, 2H), 7.09 – 7.01 (m, 3H), 6.52 (dd, *J* = 31.7, 7.4 Hz, 2H), 2.99 – 2.80 (m, 4H), 2.48 – 2.38 (m, 2H), 2.22 – 2.02 (m, 3H), 1.45 – 1.42 (m, 3H), 1.04 – 1.00 (m, 3H). <sup>13</sup>C NMR (150 MHz, Chloroform-*d*) δ 199.4, 175.5, 166.8, 145.9, 137.8, 137.5, 130.2, 127.6, 126.2, 123.5, 121.9, 112.3, 51.2, 47.0, 45.2, 38.6, 31.3, 28.7, 26.4, 21.0. HRMS (ESI-TOF) *m/z*: [M + H]<sup>+</sup> Calcd for C<sub>22</sub>H<sub>26</sub>NO<sub>2</sub><sup>+</sup> 336.1958, Found: 336.1959.

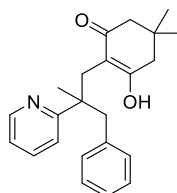

3-hydroxy-5,5-dimethyl-2-(2-methyl-3-phenyl-2-(pyridin-2-yl)propyl)cyclohex-2-en-1-one (**3v**).

Yellow oil (28.9 mg, 83%), eluent: PE/Acetone = 5:1. <sup>1</sup>H NMR (600 MHz, Chloroform-*d*) δ 14.13 (s, 1H), 8.44 (d, *J* = 3.5 Hz, 1H), 7.64 (td, *J* = 7.8, 1.9 Hz, 1H), 7.24 (ddd, *J* = 7.5, 5.1, 1.1 Hz, 1H), 7.13 (d, *J* = 8.1 Hz, 1H), 7.10 – 7.07 (m, 1H), 7.04 (dd, *J* = 8.2, 6.5 Hz, 2H), 6.56 – 6.49 (m, 2H), 2.95 – 2.86 (m, 4H), 2.29 – 2.26 (m, 4H), 1.44 (s, 3H), 1.02 (s, 6H). <sup>13</sup>C NMR (150 MHz, Chloroform-*d*) δ 198.9, 174.0, 166.6, 145.8, 137.7, 137.4, 130.1, 127.5, 126.1, 123.3, 121.8, 111.4, 51.0, 50.4, 46.7, 44.0, 31.6, 28.8, 28.0, 26.4. HRMS (ESI-TOF) *m/z*: [M + H]<sup>+</sup> Calcd for C<sub>23</sub>H<sub>28</sub>NO<sub>2</sub><sup>+</sup> 350.2115, Found: 350.2116.

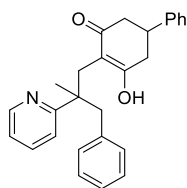

5-hydroxy-4-(2-methyl-3-phenyl-2-(pyridin-2-yl)propyl)-1,6-dihydro-[1,1'-biphenyl]-3(2H)-one (**3w**).

Yellow oil (21.4 mg, 54%), eluent: PE/Acetone = 5:1.  $^1\text{H}$  NMR (600 MHz, Chloroform-*d*)  $\delta$  14.32 (s, 1H), 8.43 (d,  $J$  = 28.5 Hz, 1H), 7.72 – 7.55 (m, 1H), 7.30 (t,  $J$  = 7.6 Hz, 2H), 7.23 (dq,  $J$  = 14.4, 7.5, 6.7 Hz, 5H), 7.10 – 7.03 (m, 3H), 6.57 – 6.57(m, 2H), 3.30 (m, 1H), 2.96 – 2.89 (m, 4H), 2.69 – 2.64 (m, 4H), 1.50 – 1.47 (m, 3H).  $^{13}\text{C}$  NMR (150 MHz, Chloroform-*d*)  $\delta$  198.1, 175.0, 166.4, 145.8, 143.5, 137.7, 137.6, 130.2, 128.6, 127.5, 126.7, 126.7, 126.2, 123.4, 121.9, 112.4, 51.2, 47.1, 44.4, 39.2, 37.8, 31.3, 26.50. HRMS (ESI-TOF)  $m/z$ :  $[\text{M} + \text{H}]^+$  Calcd for  $\text{C}_{27}\text{H}_{28}\text{NO}_2^+$  398.2115, Found: 398.2117.

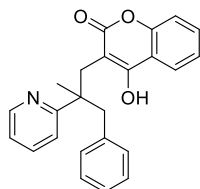

4-hydroxy-3-(2-methyl-3-phenyl-2-(pyridin-2-yl)propyl)-2H-chromen-2-one (**3x**).

Yellow solid (13.0 mg, 35%, m.p. 125 - 126 °C), eluent: PE/Acetone = 5:1.  $^1\text{H}$  NMR (600 MHz, Chloroform-*d*)  $\delta$  15.50 (s, 1H), 8.51 (d,  $J$  = 3.5 Hz, 1H), 7.90 (dd,  $J$  = 7.9, 1.7 Hz, 1H), 7.72 (td,  $J$  = 7.7, 1.8 Hz, 1H), 7.46 (ddd,  $J$  = 8.7, 7.2, 1.7 Hz, 1H), 7.33 – 7.29 (m, 1H), 7.28 – 7.25 (m, 2H), 7.24 – 7.21 (m, 1H), 7.13 – 7.10 (m, 1H), 7.07 (dd,  $J$  = 8.1, 6.5 Hz, 2H), 6.60 – 6.56 (m, 2H), 3.25 – 3.24 (m, 1H), 3.12 – 3.10 (m, 2H), 2.98 – 2.96 (m, 1H), 1.64 (s, 3H).  $^{13}\text{C}$  NMR (150 MHz, Chloroform-*d*)  $\delta$  165.8, 165.6, 164.5, 153.0, 145.6, 138.1, 137.3, 131.3, 130.2, 127.8, 126.5, 123.8, 123.4, 122.3, 117.6, 116.2, 102.0, 50.9, 47.8, 34.1, 26.7. HRMS (ESI-TOF)  $m/z$ :  $[\text{M} + \text{H}]^+$  Calcd for  $\text{C}_{24}\text{H}_{22}\text{NO}_3^+$  372.1594, Found: 372.1593.

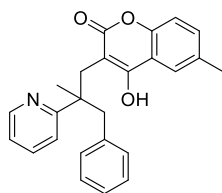

4-hydroxy-6-methyl-3-(2-methyl-3-phenyl-2-(pyridin-2-yl)propyl)-2H-chromen-2-one (**3y**).

Yellow solid (25.8 mg, 67%, m.p. 105 - 106 °C), eluent: PE/Acetone = 5:1.  $^1\text{H}$  NMR (600 MHz, Chloroform-*d*)  $\delta$  15.41 (s, 1H), 8.52 (d,  $J$  = 3.4 Hz, 1H), 7.72 (t,  $J$  = 6.9 Hz, 1H), 7.70 (d,  $J$  = 2.1 Hz, 1H), 7.31 (dd,  $J$  = 7.4, 5.3 Hz, 1H), 7.28 – 7.24 (m, 2H), 7.16 (d,  $J$  = 8.4 Hz, 1H), 7.13 – 7.09 (m, 1H), 7.07 (dd,  $J$  = 8.1, 6.5 Hz, 2H), 6.60 – 6.55 (m, 2H), 3.26 – 3.24 (m, 1H), 3.14 – 3.09 (m, 2H), 2.99 – 2.97 (m, 1H), 2.39 (s, 3H), 1.63 (s, 3H).  $^{13}\text{C}$  NMR (150 MHz, Chloroform-*d*)  $\delta$  165.7, 165.7, 164.3, 151.0, 145.5, 138.0, 137.2, 132.9, 132.2, 130.1, 127.6, 126.3, 123.7, 123.4, 122.2, 117.1, 115.9, 101.8, 50.7, 47.6, 34.0, 26.5, 20.9. HRMS (ESI-TOF)  $m/z$ :  $[\text{M} + \text{H}]^+$  Calcd for  $\text{C}_{25}\text{H}_{24}\text{NO}_3^+$  386.1751, Found: 386.1749.

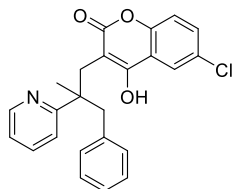

6-chloro-4-hydroxy-3-(2-methyl-3-phenyl-2-(pyridin-2-yl)propyl)-2H-chromen-2-one (**3z**).

Yellow solid (16.6 mg, 41%, m.p. 94 - 95 °C), eluent: PE/Acetone = 5:1.  $^1\text{H}$  NMR (600 MHz, Chloroform-*d*)  $\delta$  15.67 (s, 1H), 8.50 (d,  $J$  = 4.0 Hz, 1H), 7.88 (d,  $J$  = 2.6 Hz, 1H), 7.75 (td,  $J$  = 7.8, 1.8 Hz, 1H), 7.39 (dd,  $J$  = 8.7, 2.6 Hz, 1H), 7.34 (ddd,  $J$  = 7.5, 5.2, 1.1 Hz, 1H), 7.28 (d,  $J$  = 8.2 Hz, 1H), 7.20 (d,  $J$  = 8.7 Hz, 1H), 7.14 – 7.11 (m, 1H), 7.10 – 7.05 (m, 2H), 3.24 – 3.21 (m, 1H), 3.13 – 3.08 (m,

2H), 2.97 – 2.95 (m, 1H), 1.63 (s, 3H).  $^{13}\text{C}$  NMR (150 MHz, Chloroform-*d*)  $\delta$  165.6, 165.2, 163.7, 151.4, 145.4, 138.4, 137.1, 131.3, 130.2, 128.9, 127.8, 126.6, 124.0, 123.5, 122.5, 119.0, 117.7, 102.6, 50.8, 47.9, 34.1, 26.8. HRMS (ESI-TOF) *m/z*:  $[\text{M} + \text{H}]^+$  Calcd for  $\text{C}_{24}\text{H}_{21}\text{ClNO}_3^+$  406.1204, Found: 406.1204.

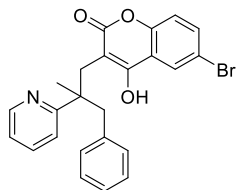

6-bromo-4-hydroxy-3-(2-methyl-3-phenyl-2-(pyridin-2-yl)propyl)-2*H*-chromen-2-one (**3aa**).

Yellow solid (17.5 mg, 39%, m.p. 131 - 132 °C), eluent: PE/Acetone = 5:1.  $^1\text{H}$  NMR (600 MHz, Chloroform-*d*)  $\delta$  15.59 (s, 1H), 8.50 (d,  $J$  = 4.5 Hz, 1H), 8.07 – 8.01 (m, 1H), 7.75 (t,  $J$  = 7.3 Hz, 1H), 7.54 (d,  $J$  = 8.6 Hz, 1H), 7.37 – 7.31 (m, 1H), 7.28 (d,  $J$  = 8.1 Hz, 1H), 7.13 (dd,  $J$  = 15.2, 7.9 Hz, 2H), 7.08 (t,  $J$  = 7.3 Hz, 2H), 6.58 (d,  $J$  = 7.3 Hz, 2H), 3.24 – 3.21 (m, 1H), 3.13 – 3.08 (m, 2H), 2.97 – 2.95 (m, 1H), 1.63 (s, 3H).  $^{13}\text{C}$  NMR (150 MHz, Chloroform-*d*)  $\delta$  165.4, 165.0, 163.5, 151.8, 145.3, 138.3, 137.0, 133.9, 130.1, 127.7, 126.4, 123.8, 122.4, 119.3, 117.9, 116.1, 102.5, 50.7, 47.7, 34.0, 26.7. HRMS (ESI-TOF) *m/z*:  $[\text{M} + \text{H}]^+$  Calcd for  $\text{C}_{24}\text{H}_{21}\text{BrNO}_3^+$  450.0699, Found: 450.0700.

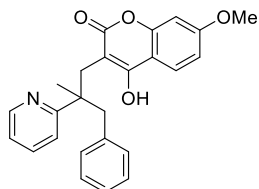

4-hydroxy-7-methoxy-3-(2-methyl-3-phenyl-2-(pyridin-2-yl)propyl)-2*H*-chromen-2-one (**3ab**).

Yellow solid (16.4 mg, 41%, m.p. 102 - 103 °C), eluent: PE/Acetone = 5:1.  $^1\text{H}$  NMR (600 MHz, Chloroform-*d*)  $\delta$  15.28 (s, 1H), 8.50 (d,  $J$  = 3.5 Hz, 1H), 7.78 (d,  $J$  = 8.8 Hz, 1H), 7.71 (td,  $J$  = 7.8, 1.8 Hz, 1H), 7.30 (ddd,  $J$  = 7.4, 5.2, 1.0 Hz, 1H), 7.25 (d,  $J$  = 7.7 Hz, 1H), 7.13 – 7.09 (m, 1H), 7.06 (dd,  $J$  = 8.2, 6.5 Hz, 2H), 6.80 (dd,  $J$  = 8.7, 2.5 Hz, 1H), 6.76 (d,  $J$  = 2.4 Hz, 1H), 6.60 – 6.56 (m, 2H), 3.84 (s, 3H), 3.23 – 3.21 (m, 1H), 3.11 – 3.06 (m, 2H), 2.98 – 2.95 (m, 1H), 1.63 (s, 3H).  $^{13}\text{C}$  NMR (150 MHz, Chloroform-*d*)  $\delta$  166.0, 165.9, 164.9, 162.5, 154.7, 145.6, 138.0, 137.4, 130.2, 127.7, 126.4, 124.9, 123.8, 122.3, 111.7, 111.0, 100.0, 99.4, 55.7, 50.9, 47.7, 34.0, 26.6. HRMS (ESI-TOF) *m/z*:  $[\text{M} + \text{H}]^+$  Calcd for  $\text{C}_{25}\text{H}_{24}\text{NO}_4^+$  402.1700, Found: 402.1702.

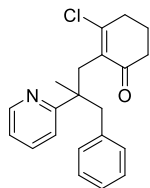

3-chloro-2-(2-methyl-3-phenyl-2-(pyridin-2-yl)propyl)cyclohex-2-en-1-one (**4**).

Dark red oil (34.0 mg, 99%), eluent: PE/EA = 10:1.  $^1\text{H}$  NMR (400 MHz, Chloroform-*d*)  $\delta$  8.65 (ddd,  $J$  = 4.8, 1.9, 0.9 Hz, 1H), 7.48 (td,  $J$  = 7.8, 1.9 Hz, 1H), 7.09 (ddd,  $J$  = 7.6, 4.8, 1.1 Hz, 1H), 7.06 – 7.00 (m, 4H), 6.78 – 6.74 (m, 2H), 3.76 – 3.73 (m, 1H), 3.11 – 3.00 (m, 2H), 2.80 – 2.77 (m, 1H), 2.72 – 2.69 (m, 2H), 2.43 – 2.30 (m, 2H), 2.04 – 1.96 (m, 2H), 1.22 (s, 3H).  $^{13}\text{C}$  NMR (100 MHz, Chloroform-*d*)  $\delta$  196.2, 165.1, 154.8, 148.4, 139.1, 135.9, 135.7, 130.5, 127.5, 125.8, 121.4, 121.2, 47.5, 46.6, 39.1, 37.3, 35.7, 22.4, 21.9. HRMS (ESI-TOF) *m/z*:  $[\text{M} + \text{H}]^+$  Calcd for  $\text{C}_{21}\text{H}_{23}\text{ClNO}^+$  340.1463, Found: 340.1460.

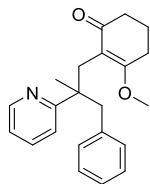

3-methoxy-2-(2-methyl-3-phenyl-2-(pyridin-2-yl)propyl)cyclohex-2-en-1-one (**5**).

Yellow oil (27.4 mg, 82%), eluent: PE/EA = 1:1.  $^1\text{H}$  NMR (600 MHz, Chloroform-*d*)  $\delta$  8.67 (ddd,  $J$  = 4.8, 1.9, 0.9 Hz, 1H), 7.47 (td,  $J$  = 7.7, 1.9 Hz, 1H), 7.08 – 6.98 (m, 5H), 6.82 – 6.71 (m, 2H), 3.71 – 3.68 (m, 1H), 3.43 (s, 3H), 2.93 – 2.91 (m, 1H), 2.85 – 2.83 (m, 1H), 2.74 – 2.71 (m, 1H), 2.46 – 2.43 (m, 2H), 2.35 – 2.25 (m, 2H), 1.97 – 1.91 (m, 2H), 1.14 (s, 3H).  $^{13}\text{C}$  NMR (150 MHz, Chloroform-*d*)  $\delta$  198.2, 173.1, 166.5, 148.0, 140.0, 135.3, 130.4, 127.4, 125.5, 121.6, 120.6, 116.5, 54.8, 47.5, 46.5, 36.5, 34.8, 25.0, 21.7, 20.7. HRMS (ESI-TOF)  $m/z$ :  $[\text{M} + \text{H}]^+$  Calcd for  $\text{C}_{22}\text{H}_{26}\text{NO}_2^+$  336.1958, Found: 336.1960.

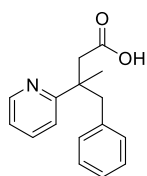

3-methyl-4-phenyl-3-(pyridin-2-yl)butanoic acid (**6**).

Yellow oil (22.9 mg, 90%), eluent:  $\text{CH}_2\text{Cl}_2/\text{MeOH}$  = 20:1.  $^1\text{H}$  NMR (400 MHz, DMSO-*d*<sub>6</sub>)  $\delta$  11.88 (s, 1H), 8.60 – 8.31 (m, 1H), 7.59 (td,  $J$  = 7.7, 1.9 Hz, 1H), 7.17 – 7.10 (m, 2H), 7.08 – 7.01 (m, 3H), 6.69 – 6.60 (m, 2H), 3.03 – 3.00 (m, 1H), 2.93 – 2.85 (m, 2H), 2.50 – 2.46 (m, 1H), 1.33 (s, 3H).  $^{13}\text{C}$  NMR (100 MHz, Chloroform-*d*)  $\delta$  173.3, 165.0, 146.3, 138.3, 136.4, 130.3, 127.9, 126.7, 122.7, 122.6, 53.4, 48.2, 47.2, 43.5, 26.2. HRMS (ESI-TOF)  $m/z$ :  $[\text{M} + \text{H}]^+$  Calcd for  $\text{C}_{16}\text{H}_{18}\text{NO}_2^+$  256.1332, Found: 256.1328.



## 5. NMR Spectrum and NRMS Data

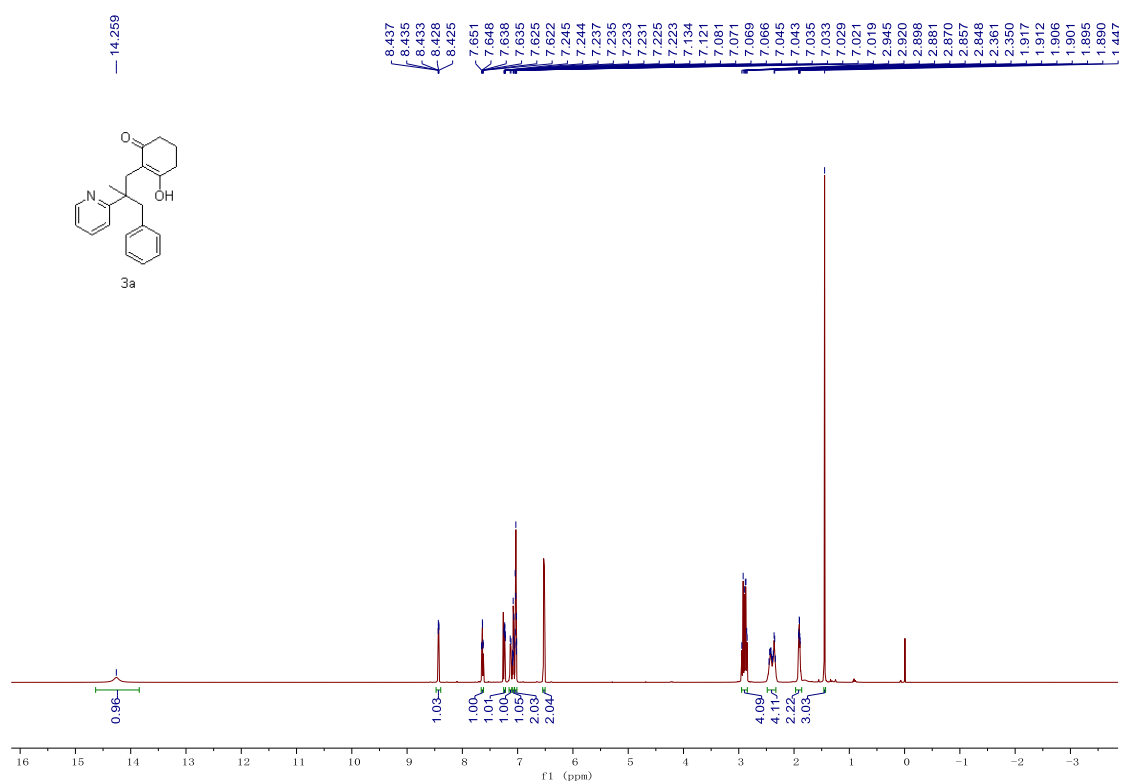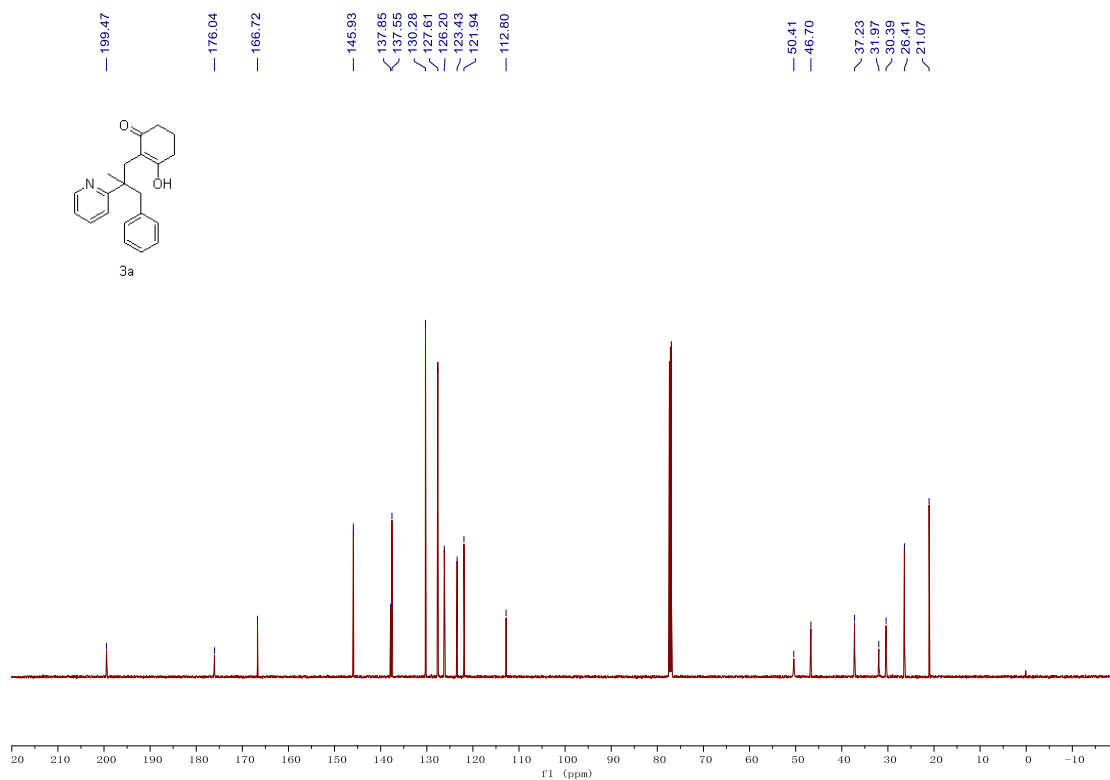

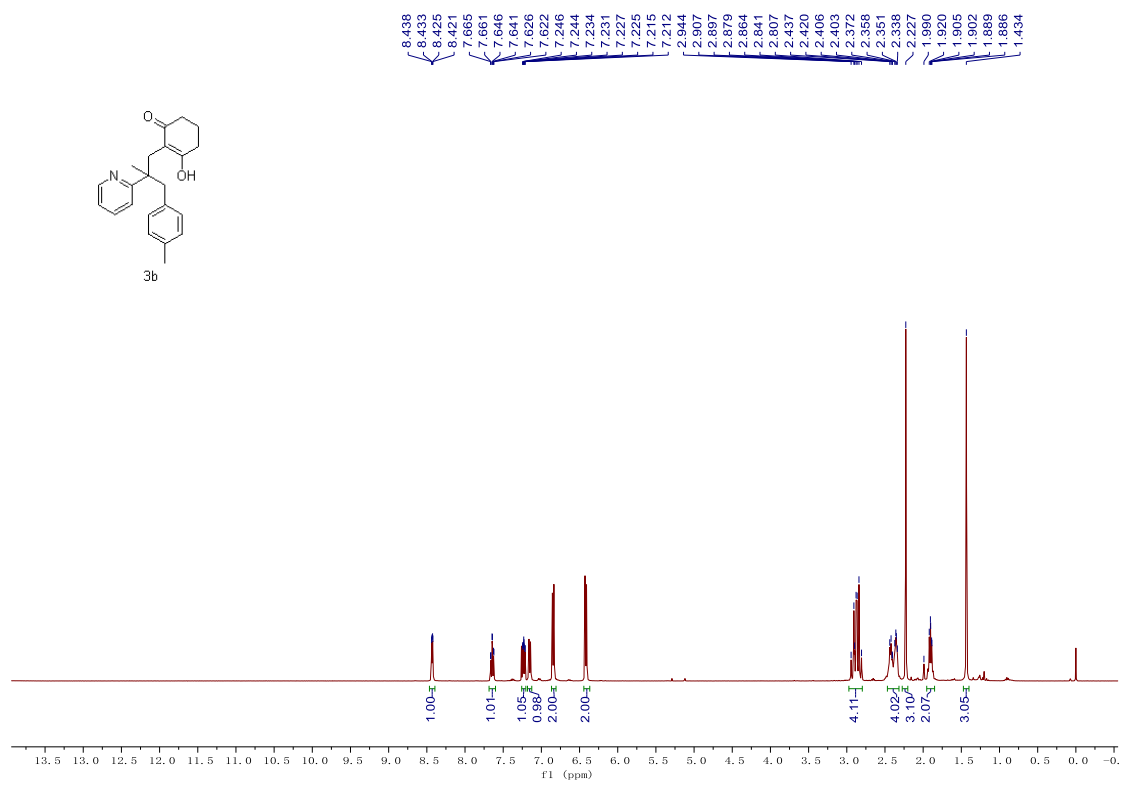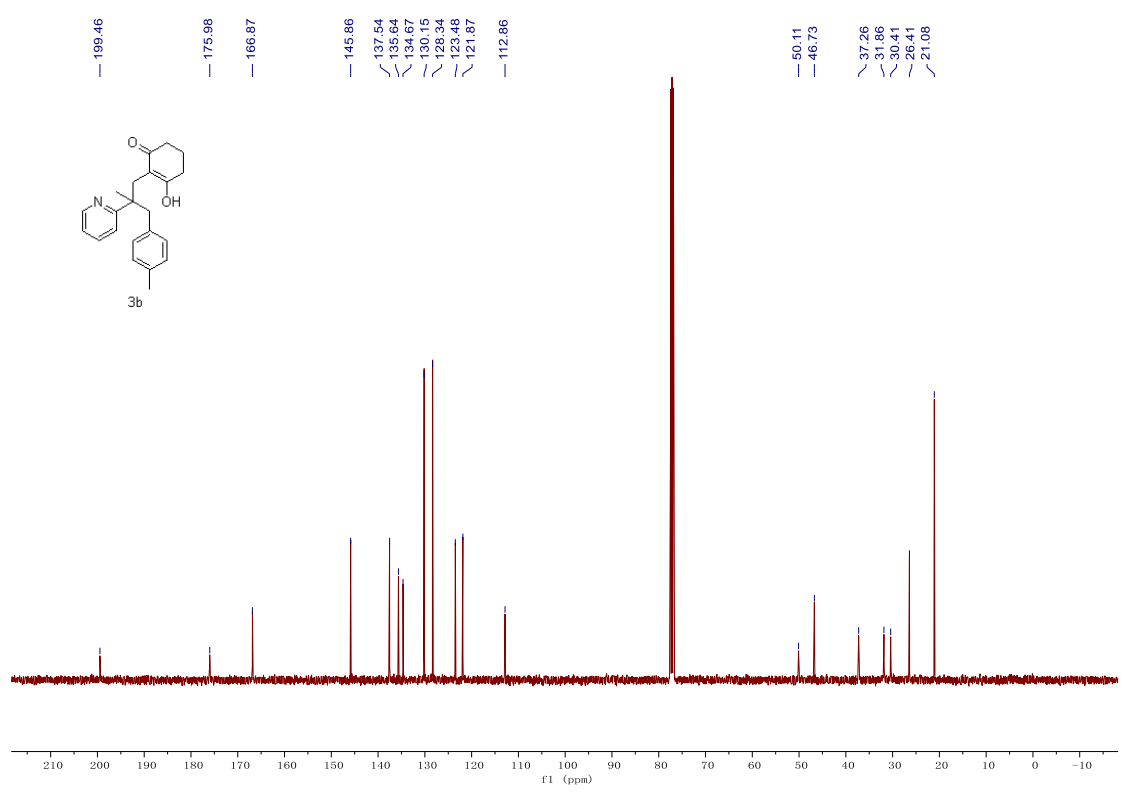

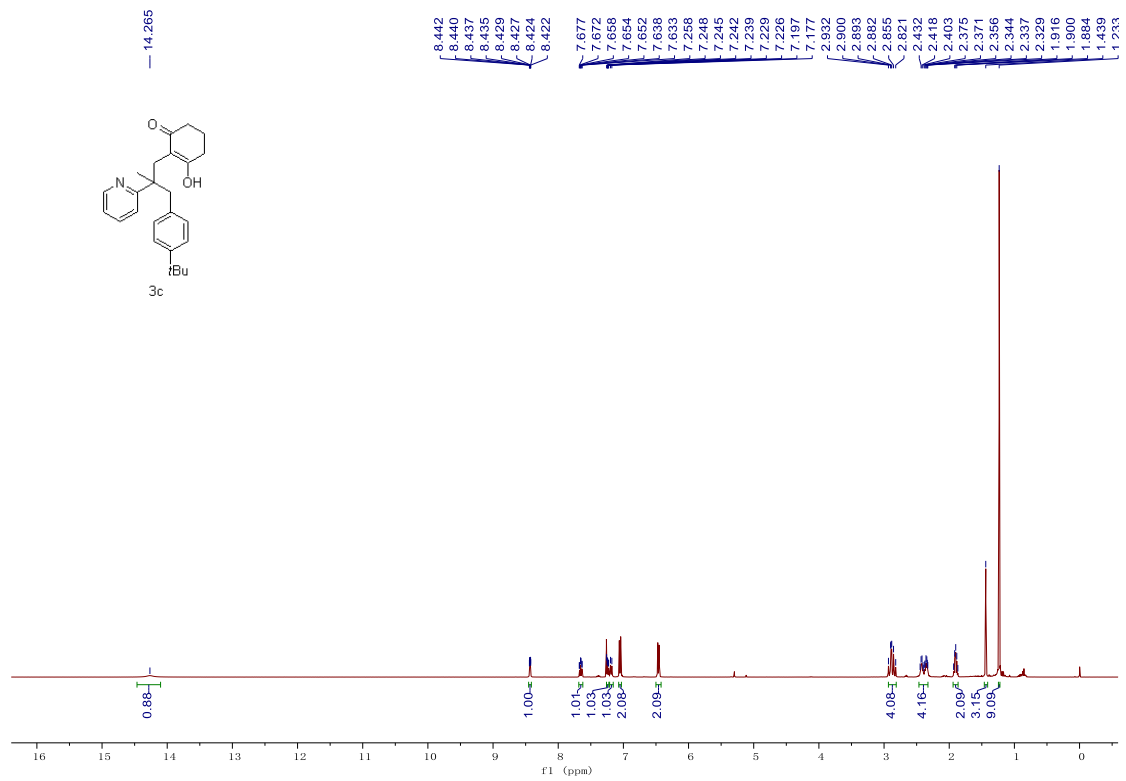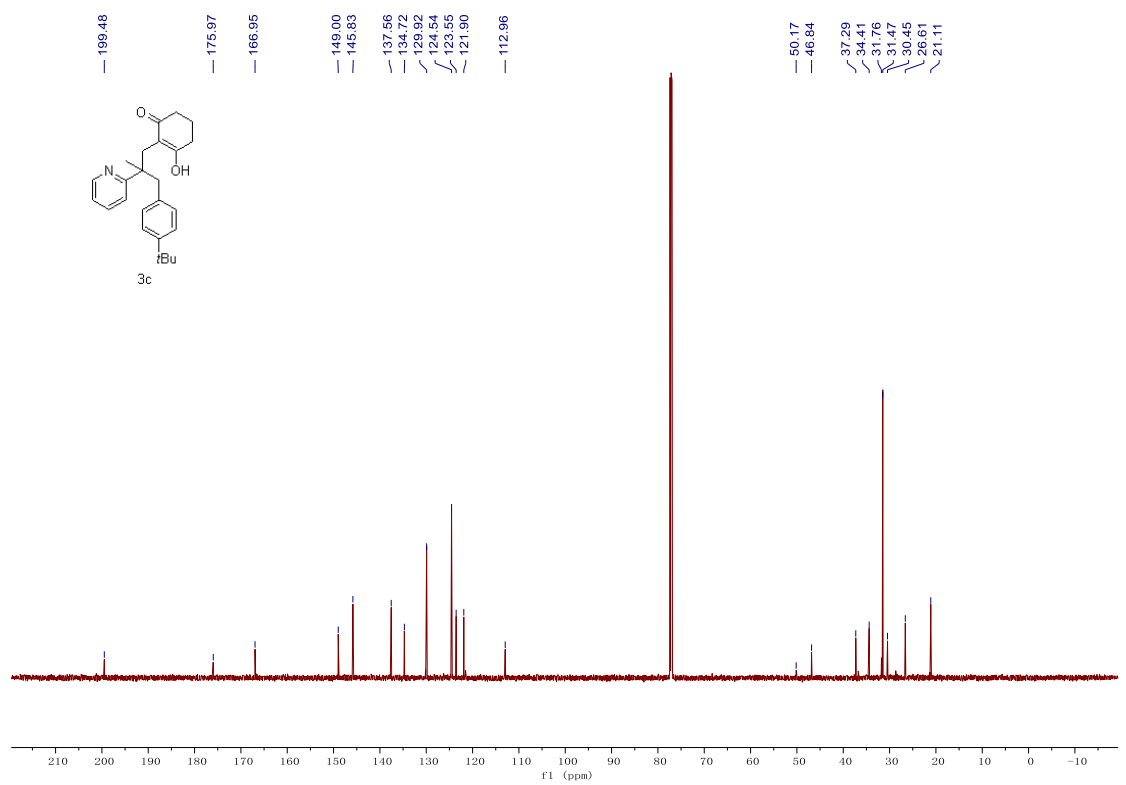

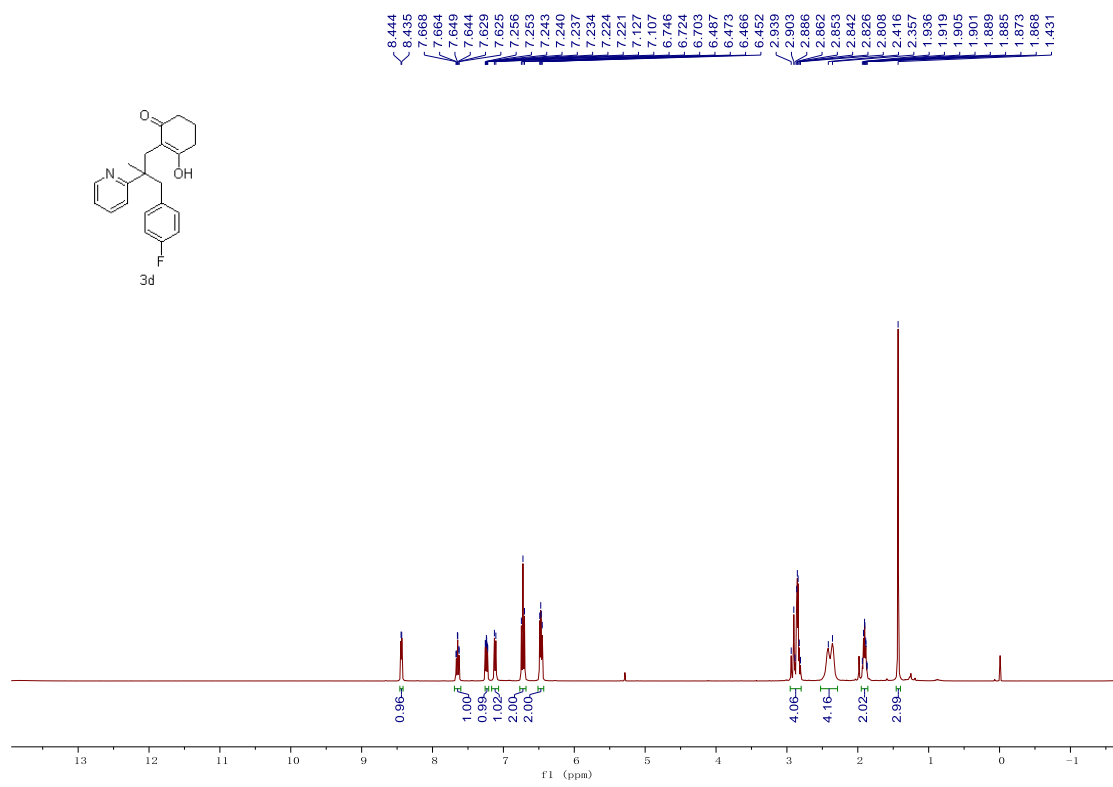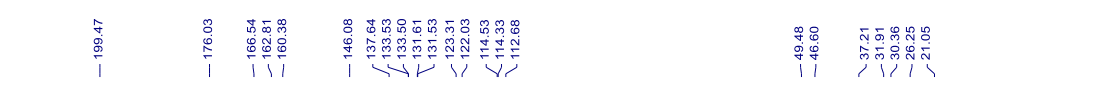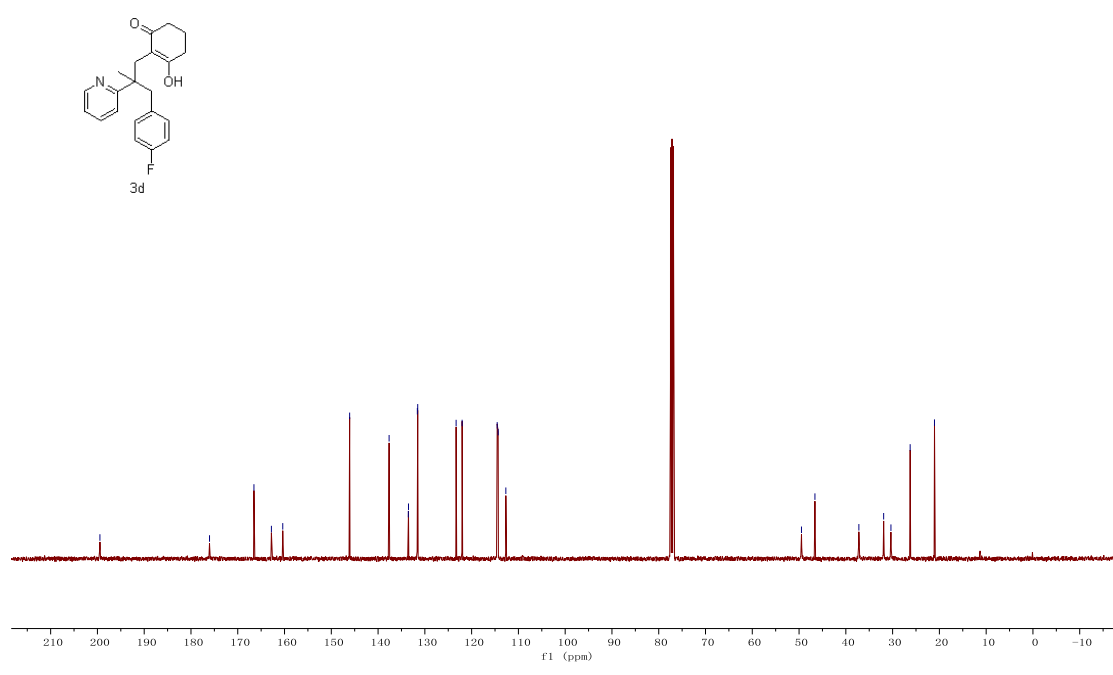

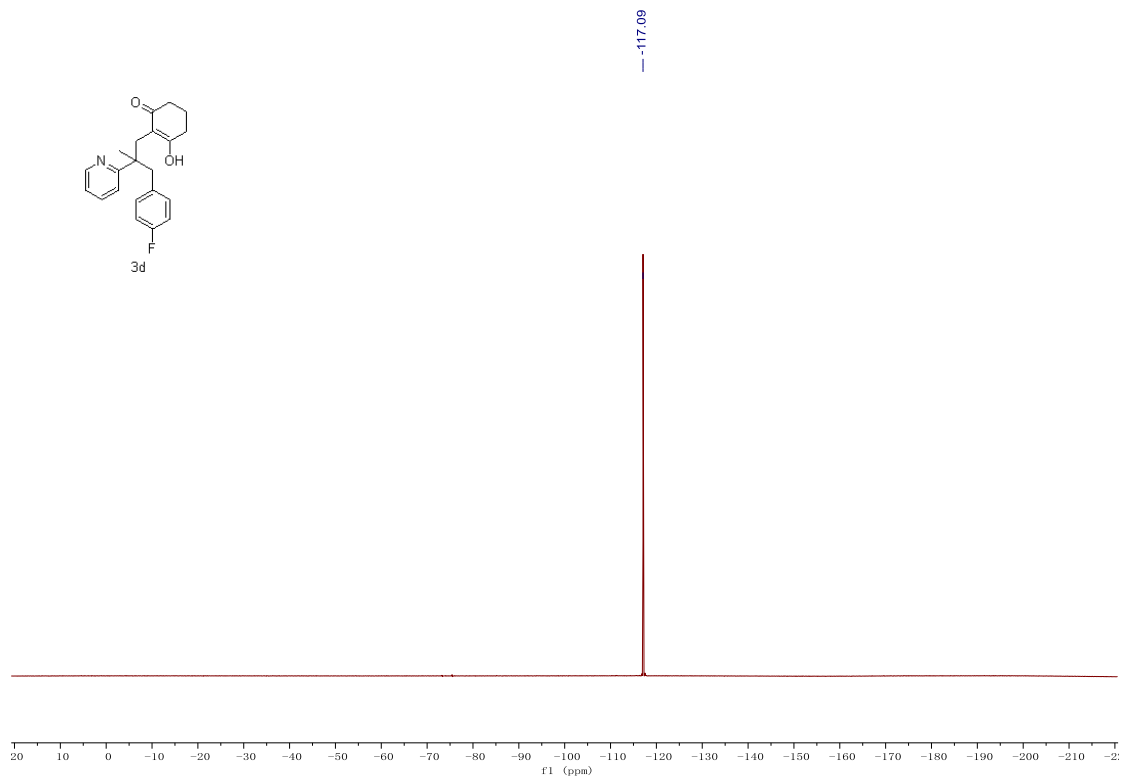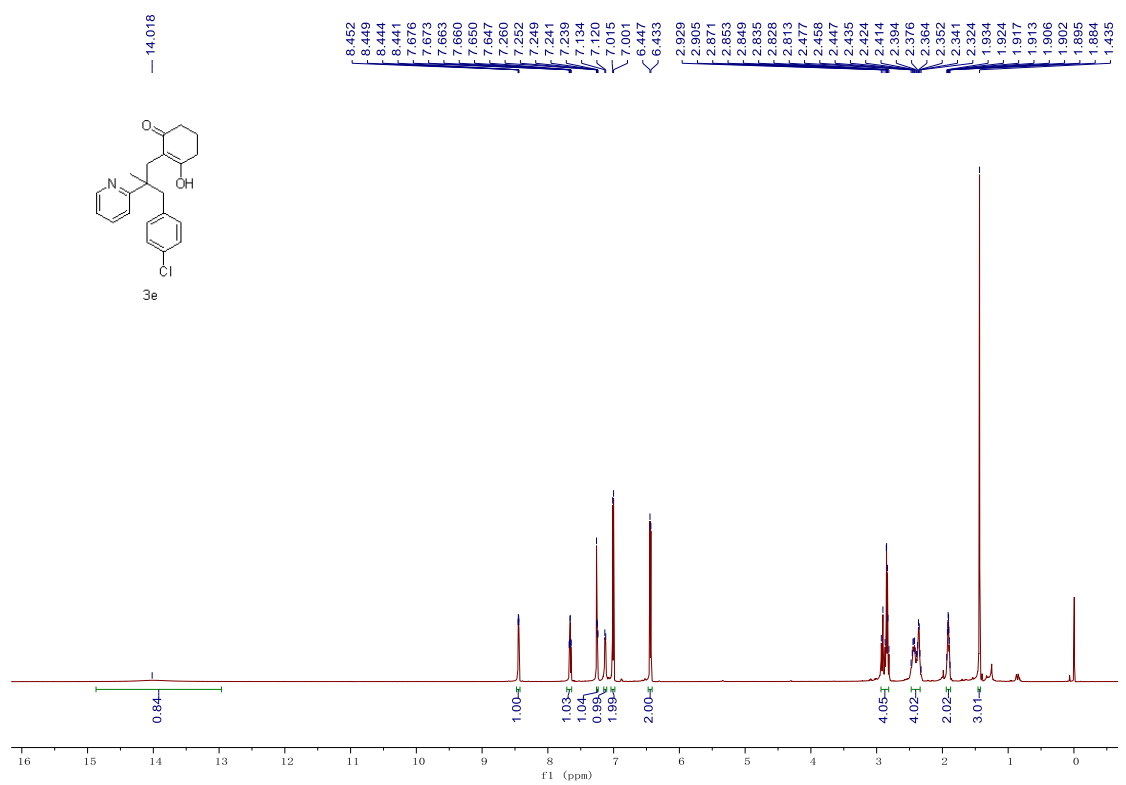

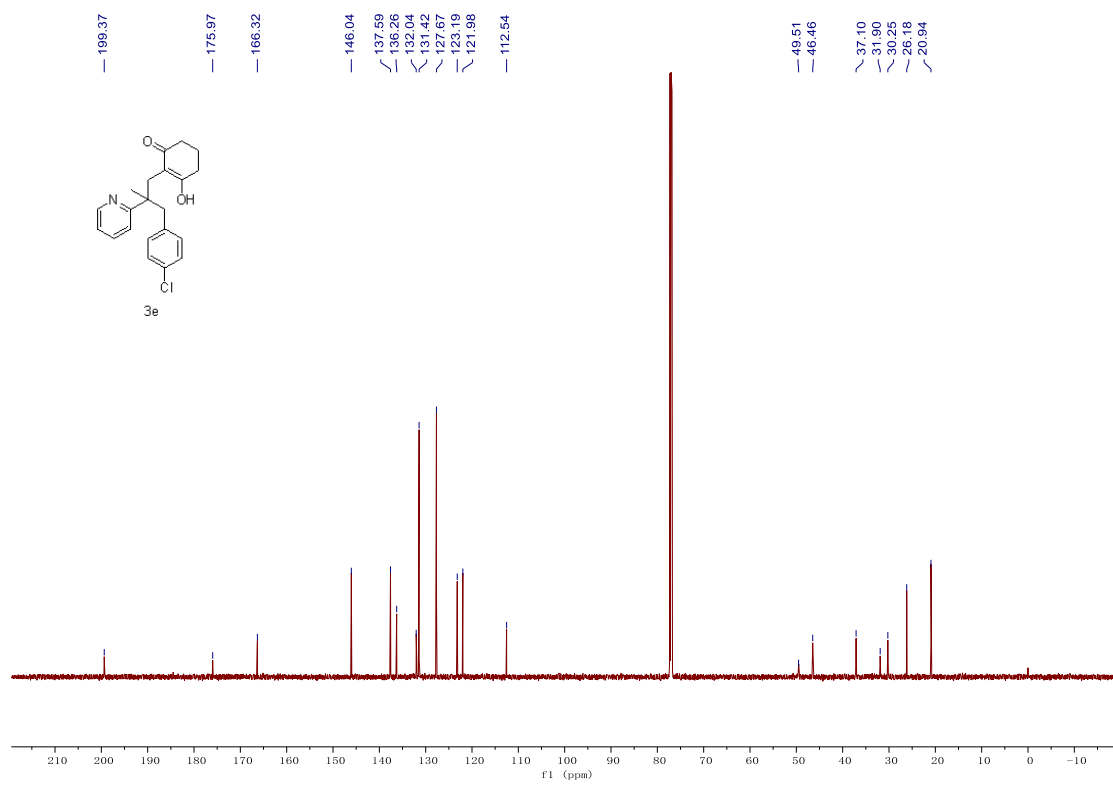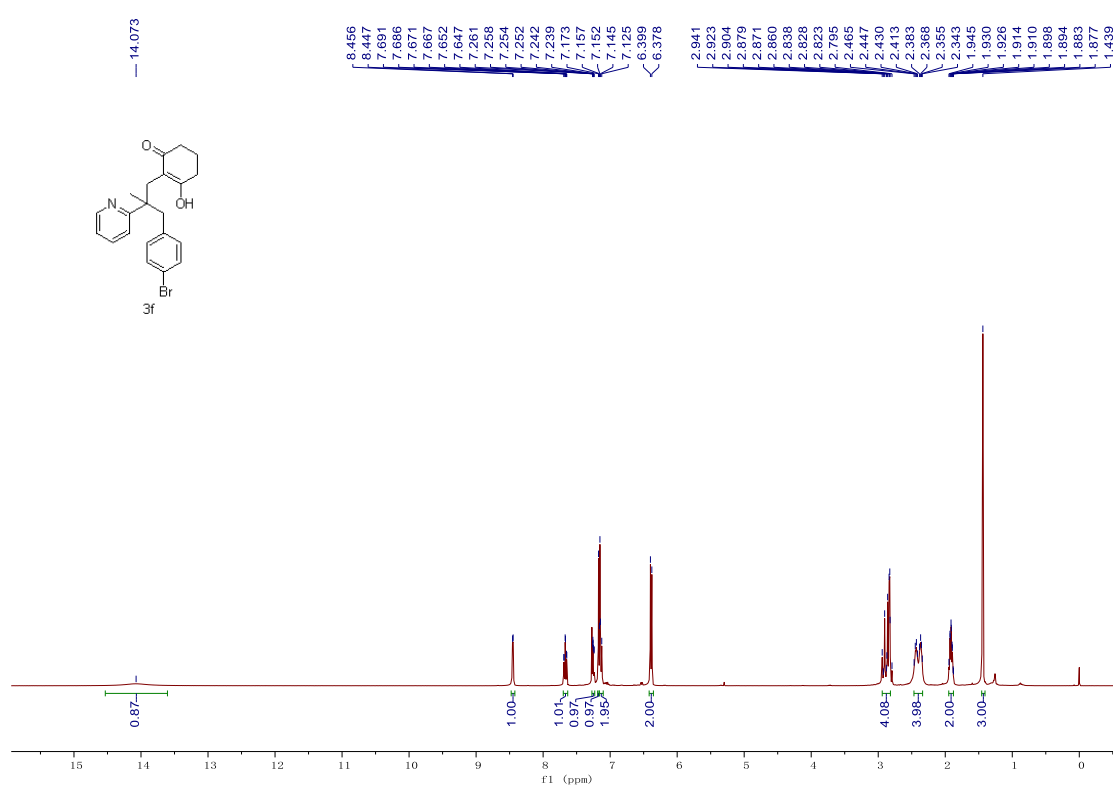

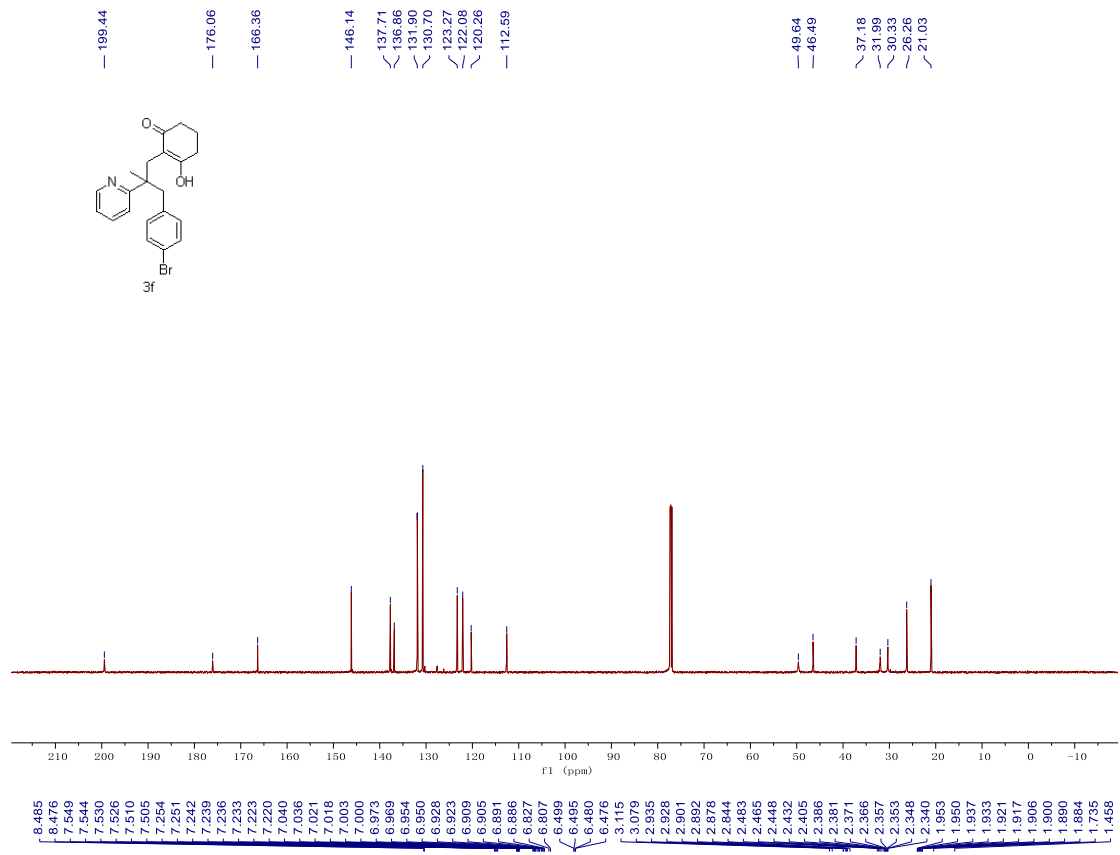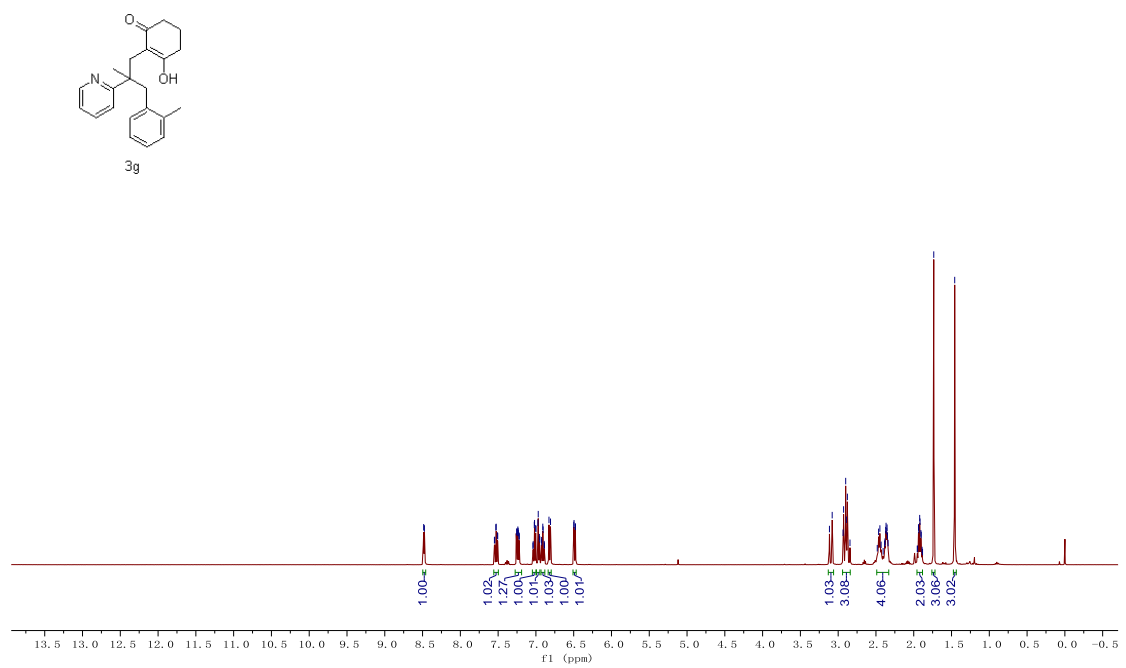

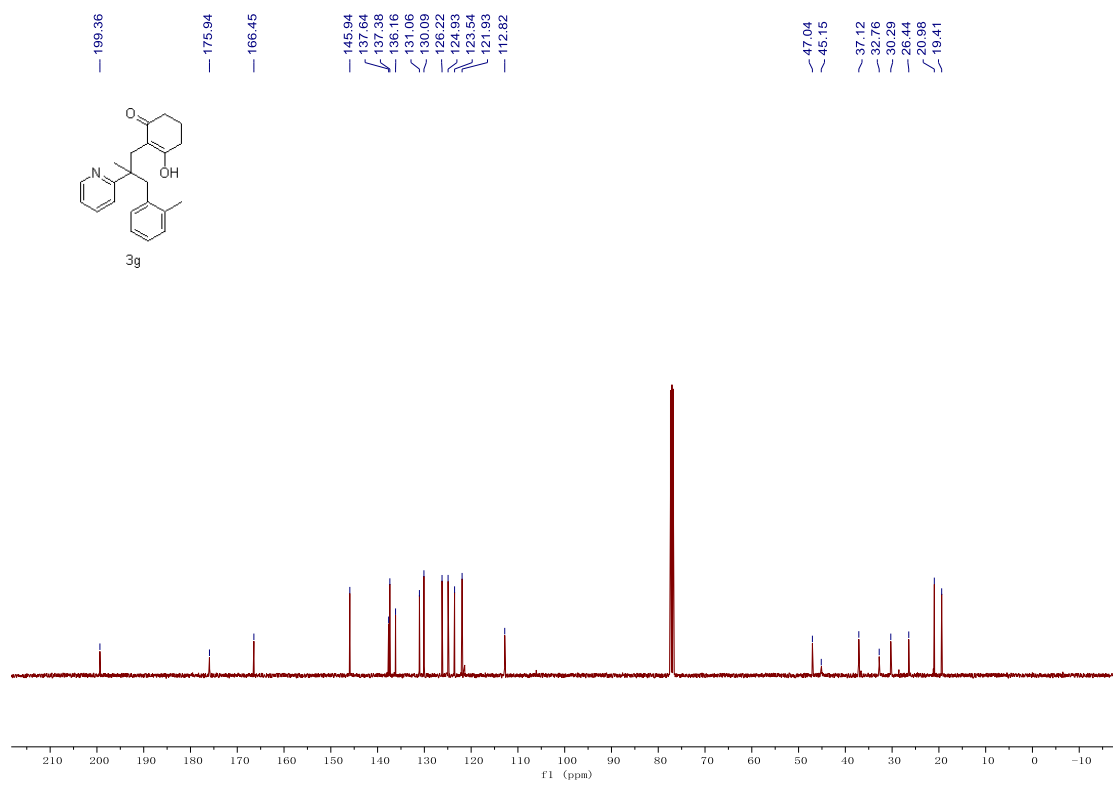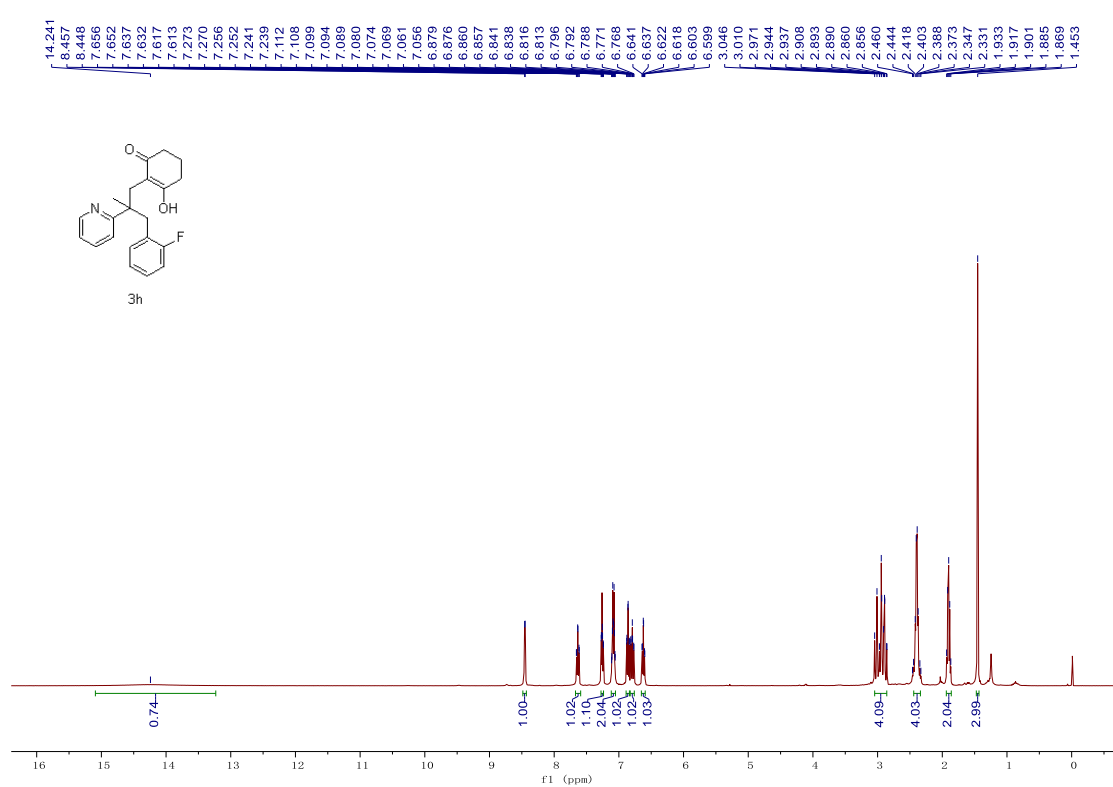



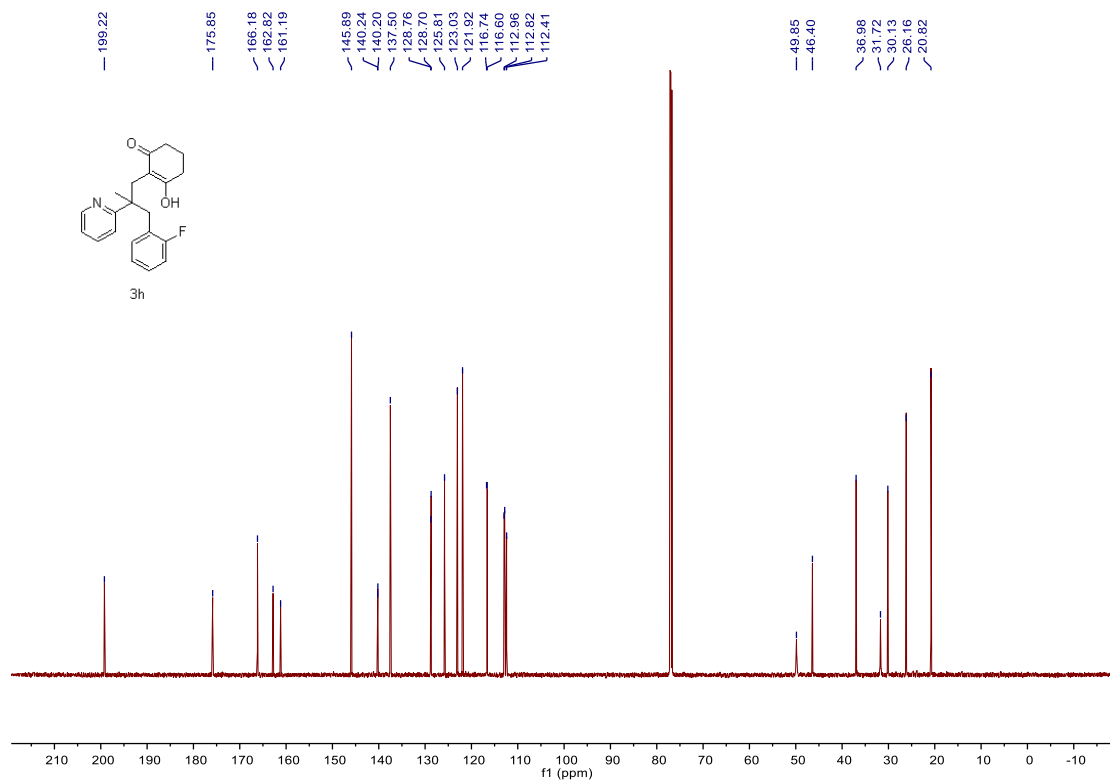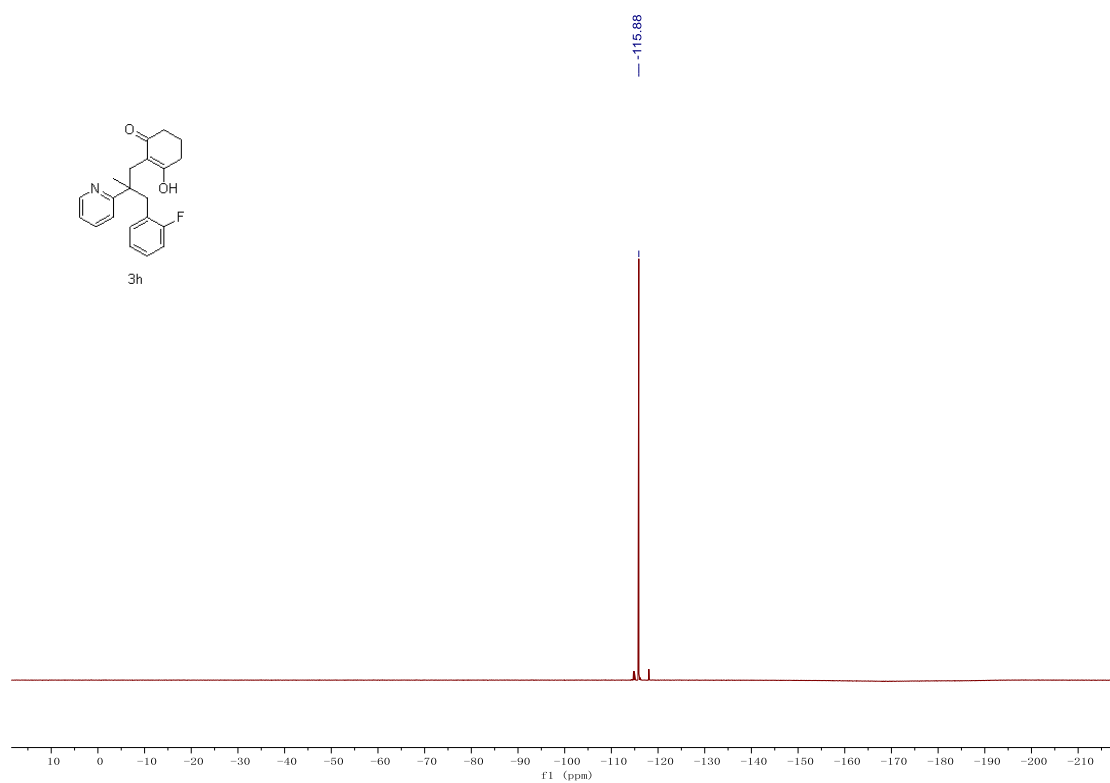

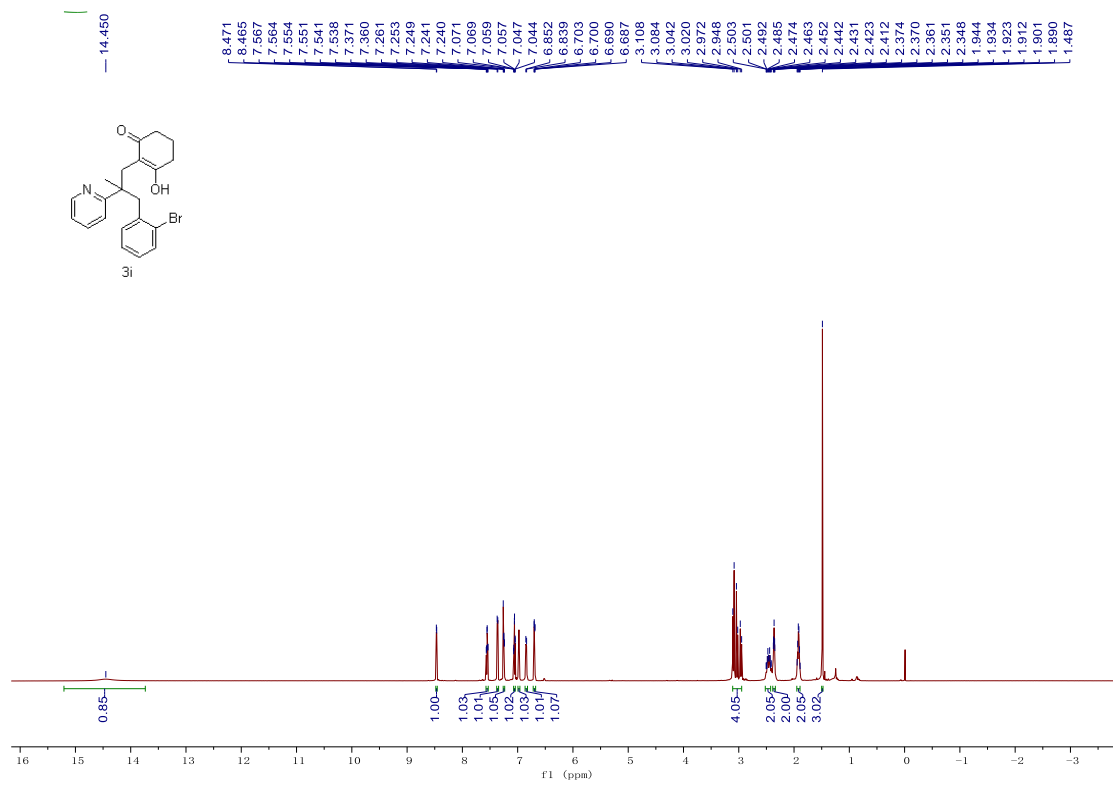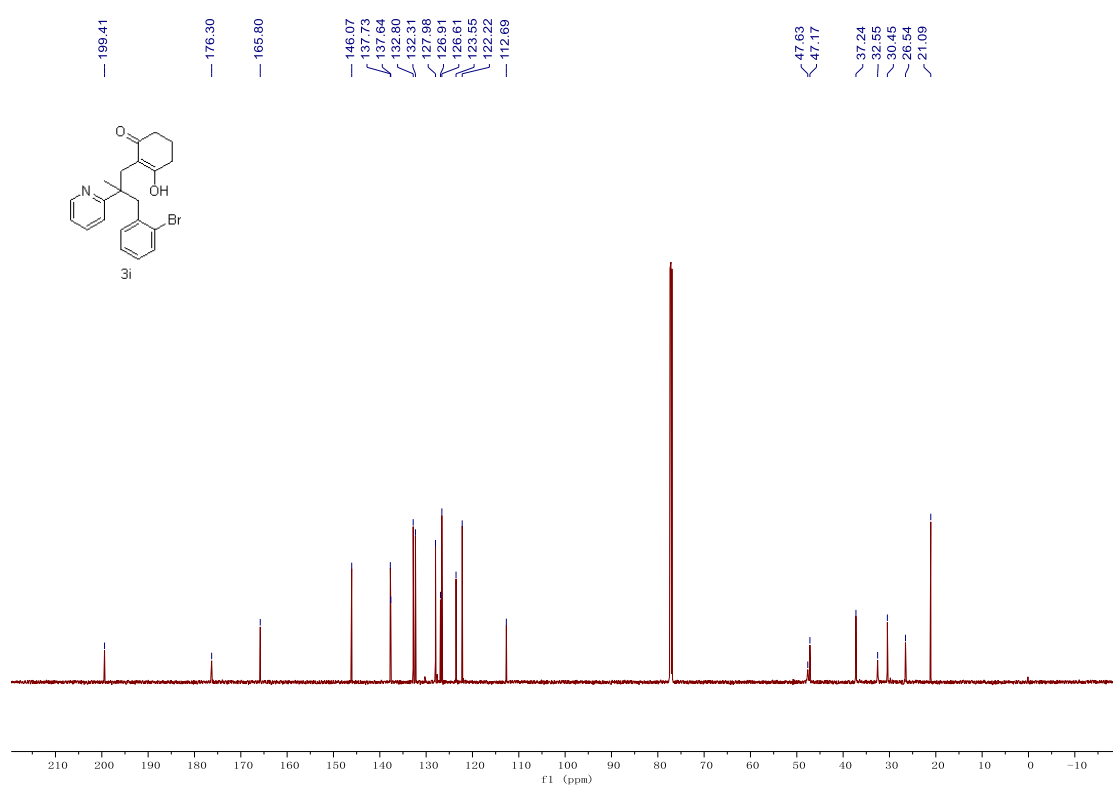

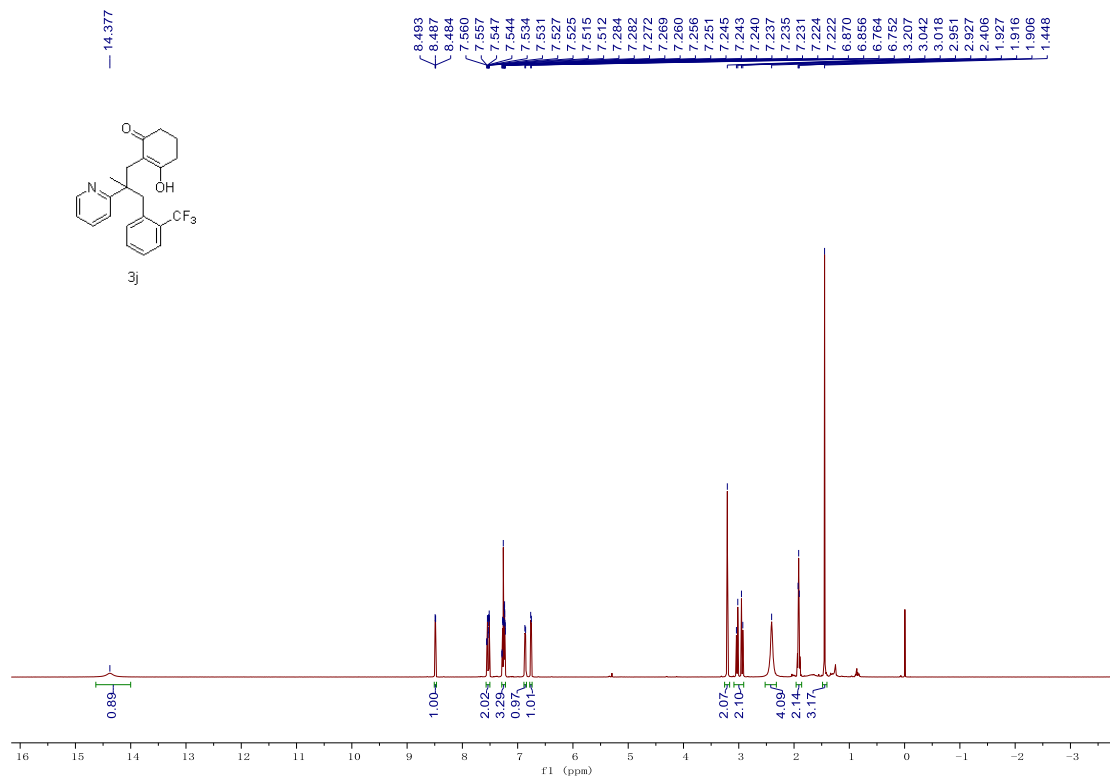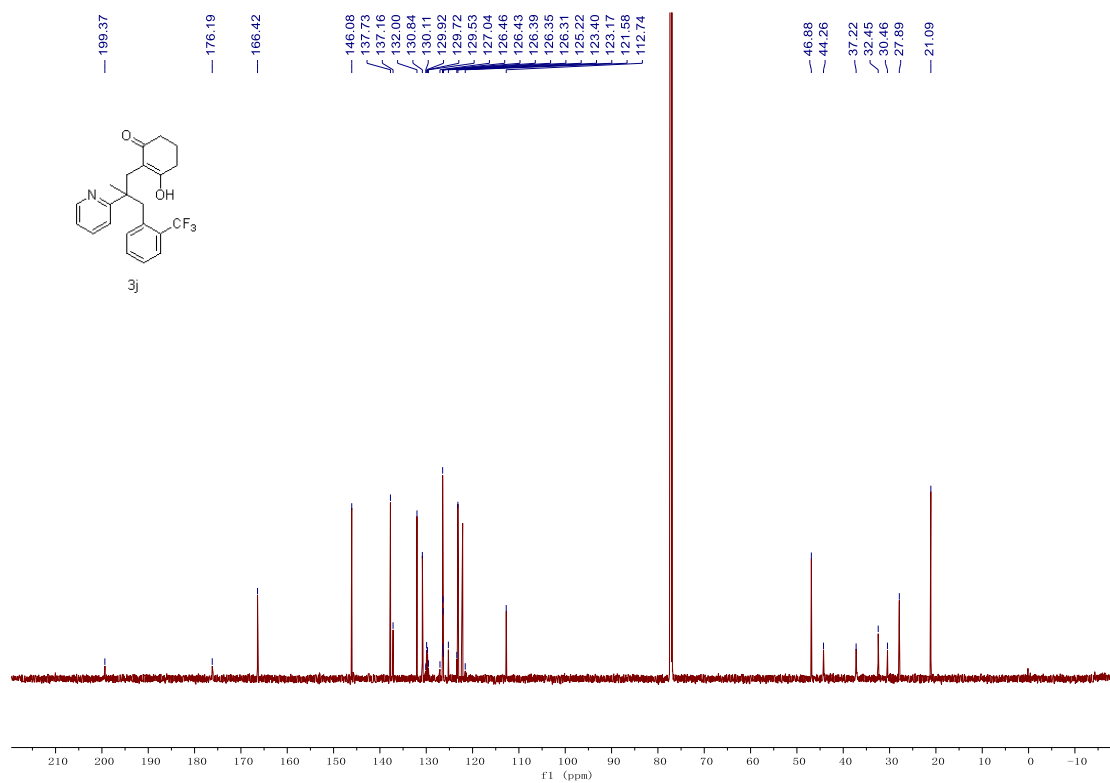

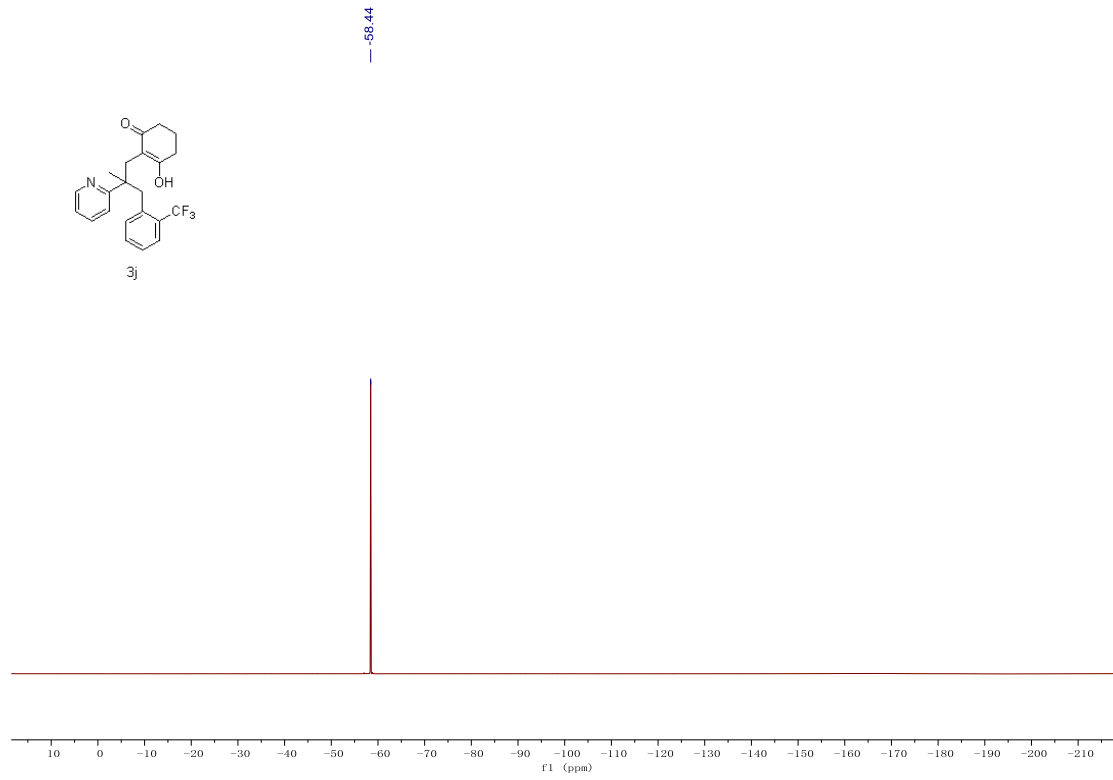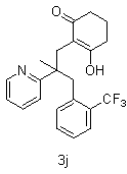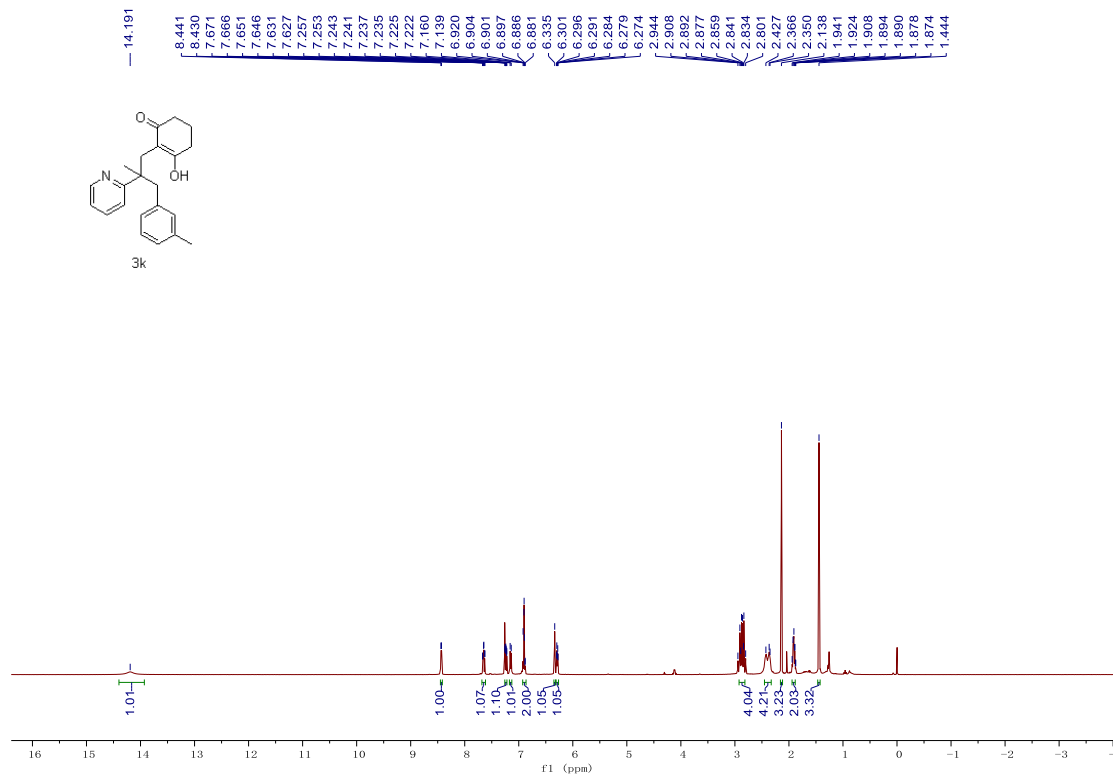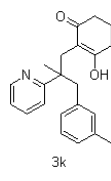

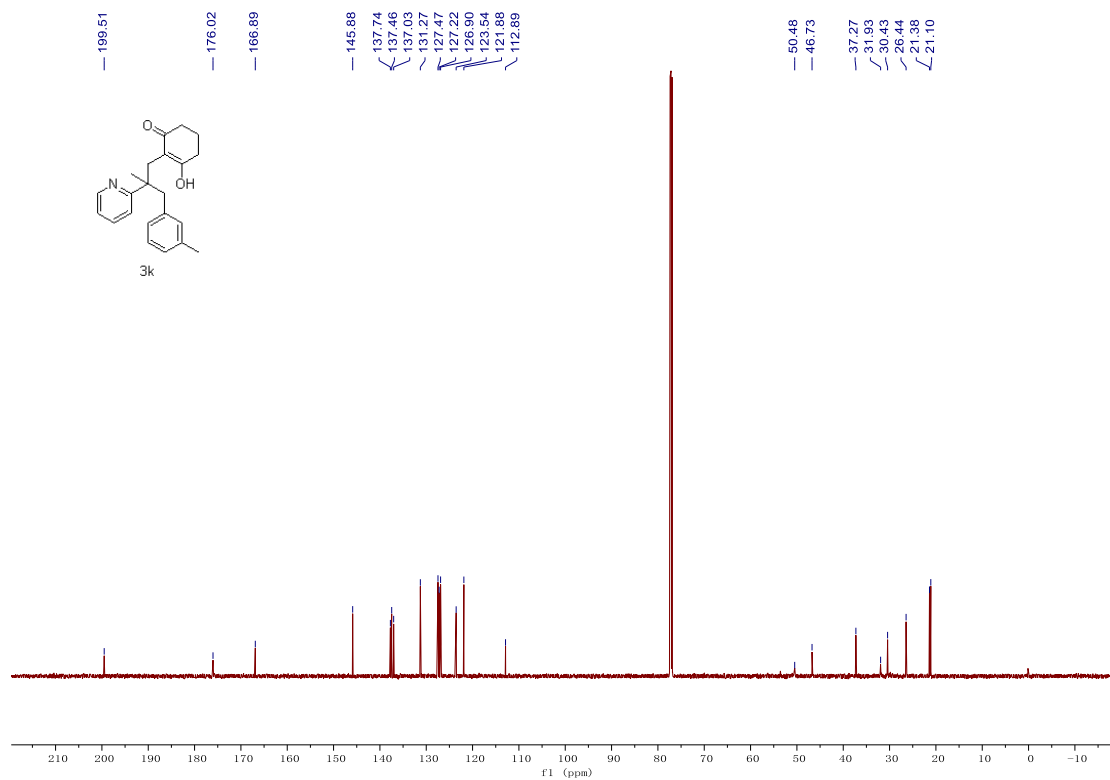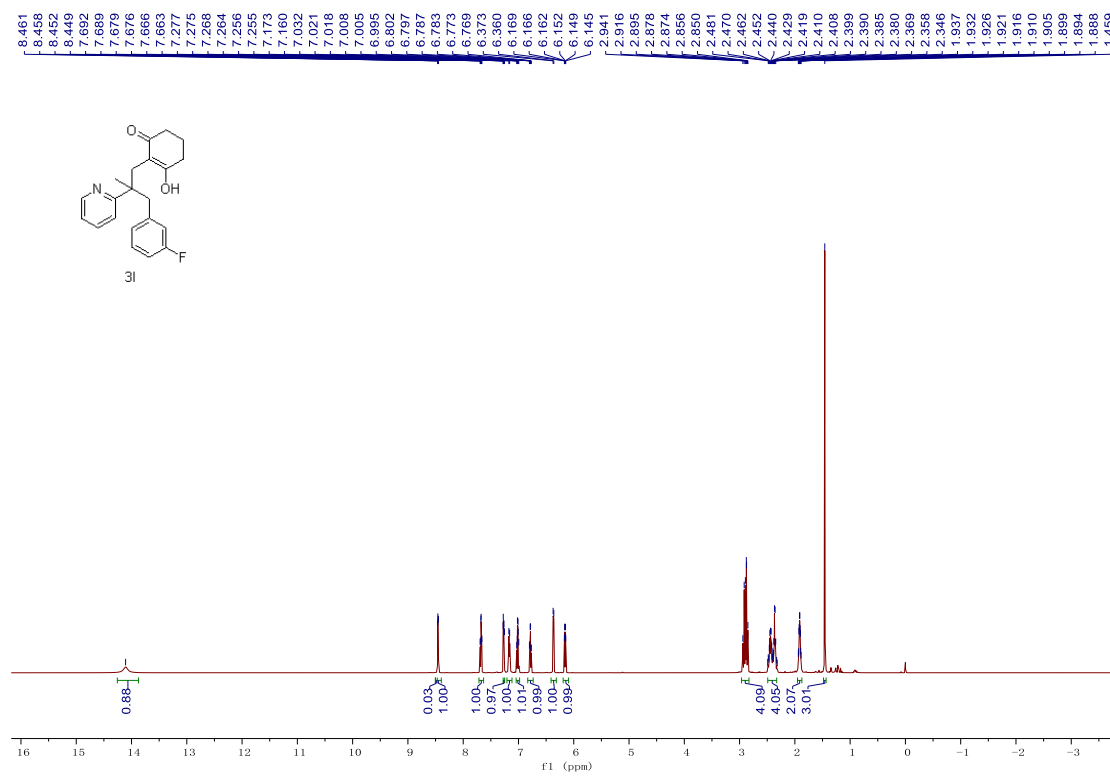

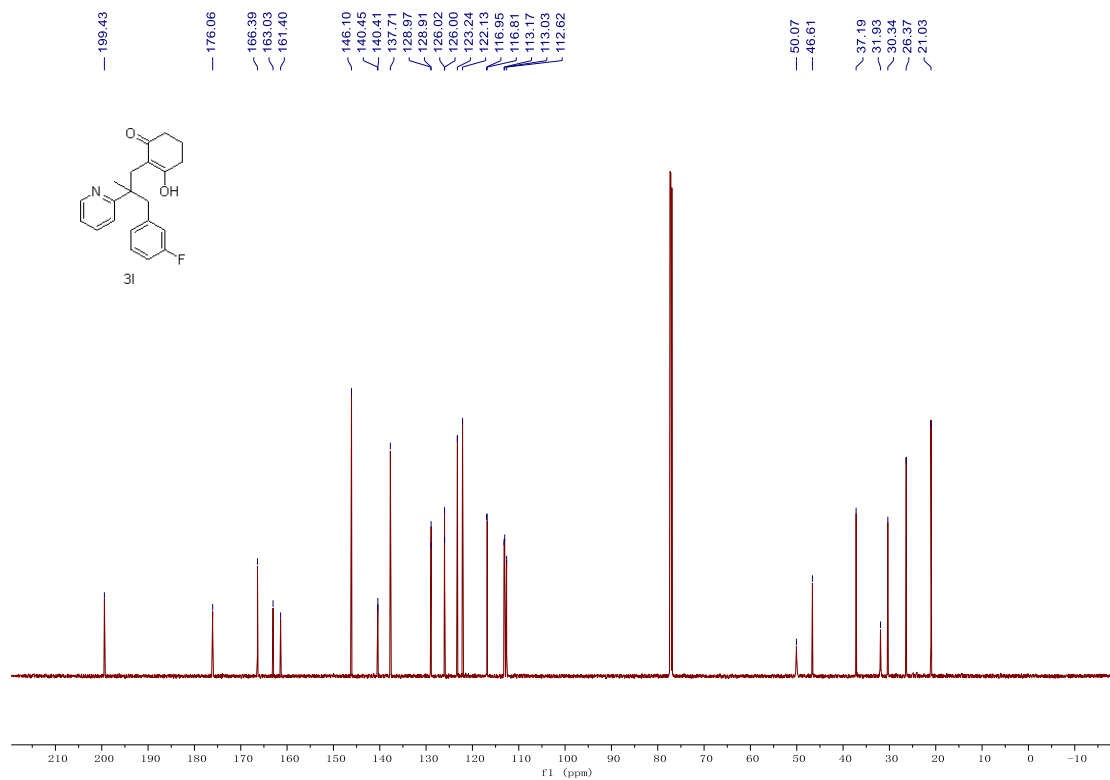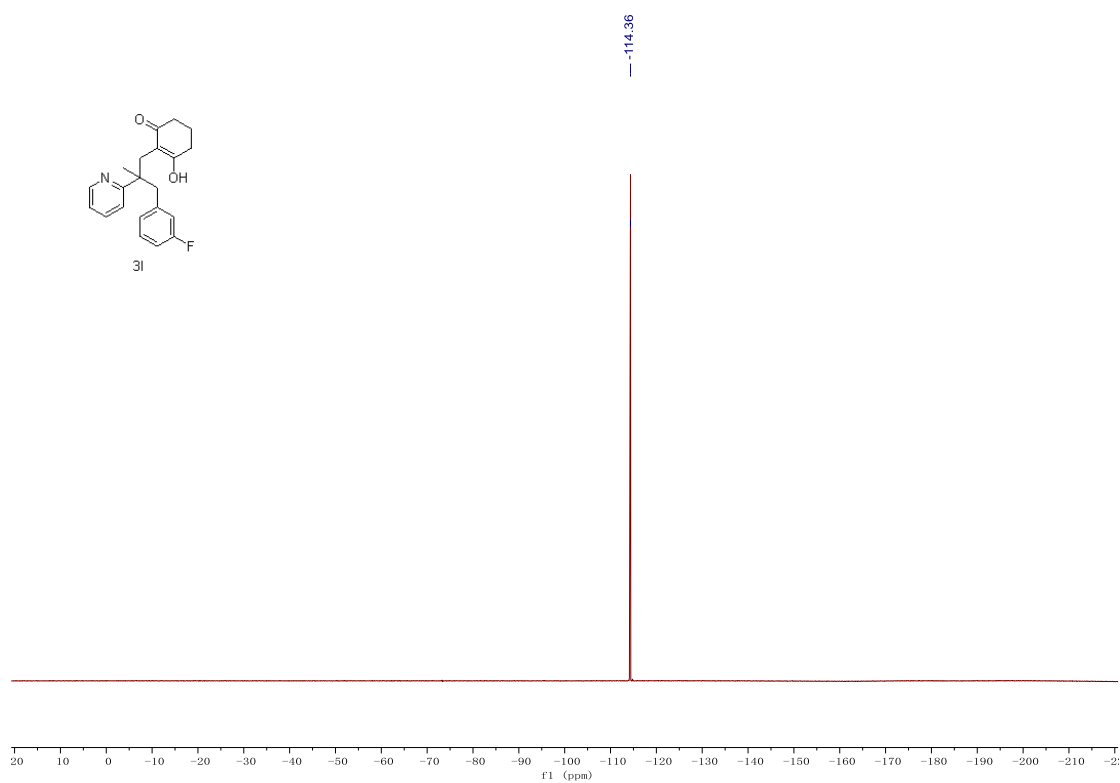

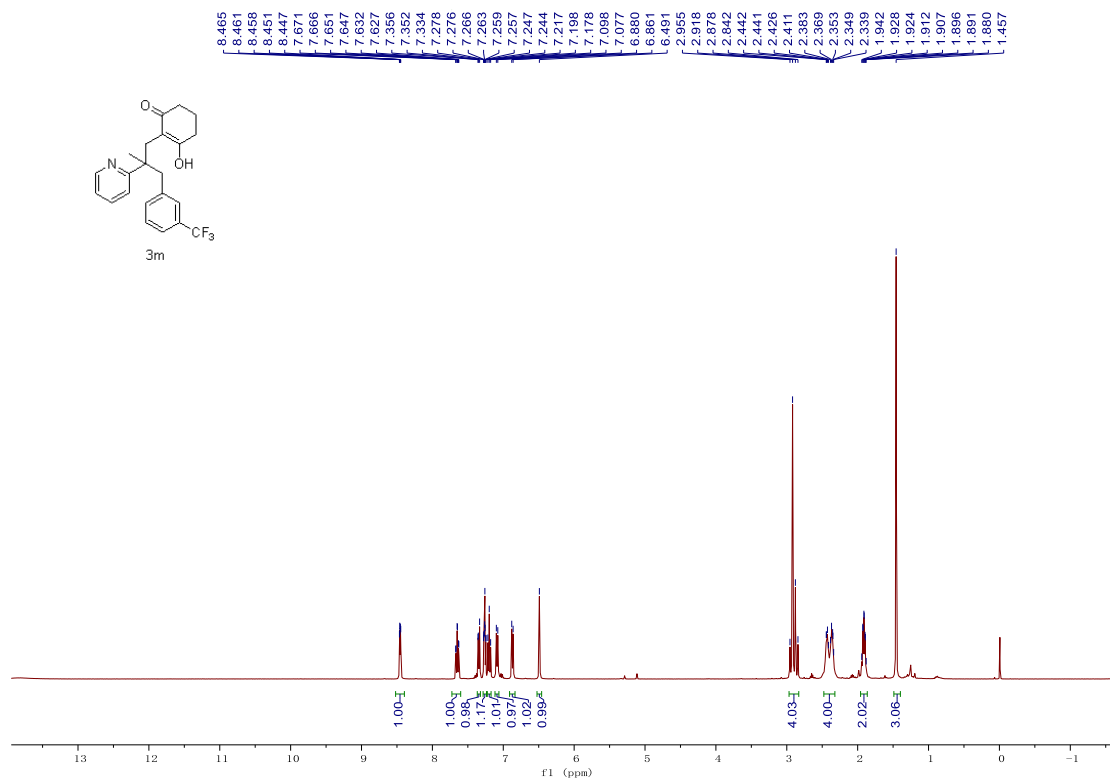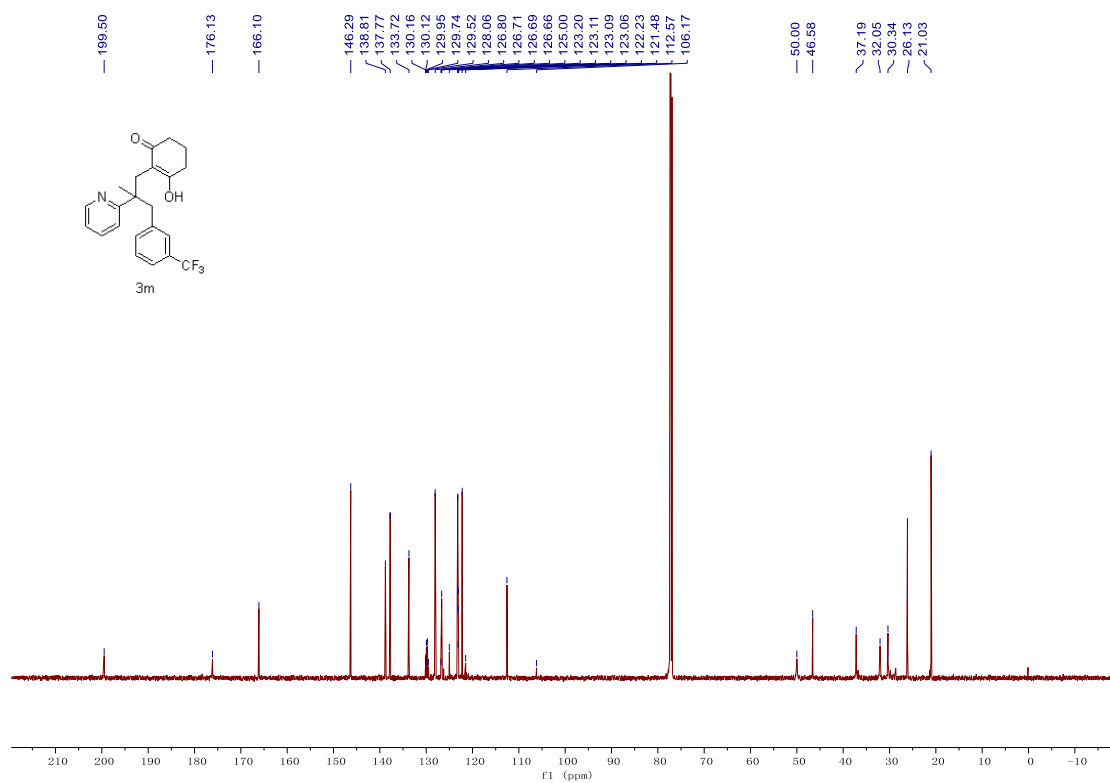

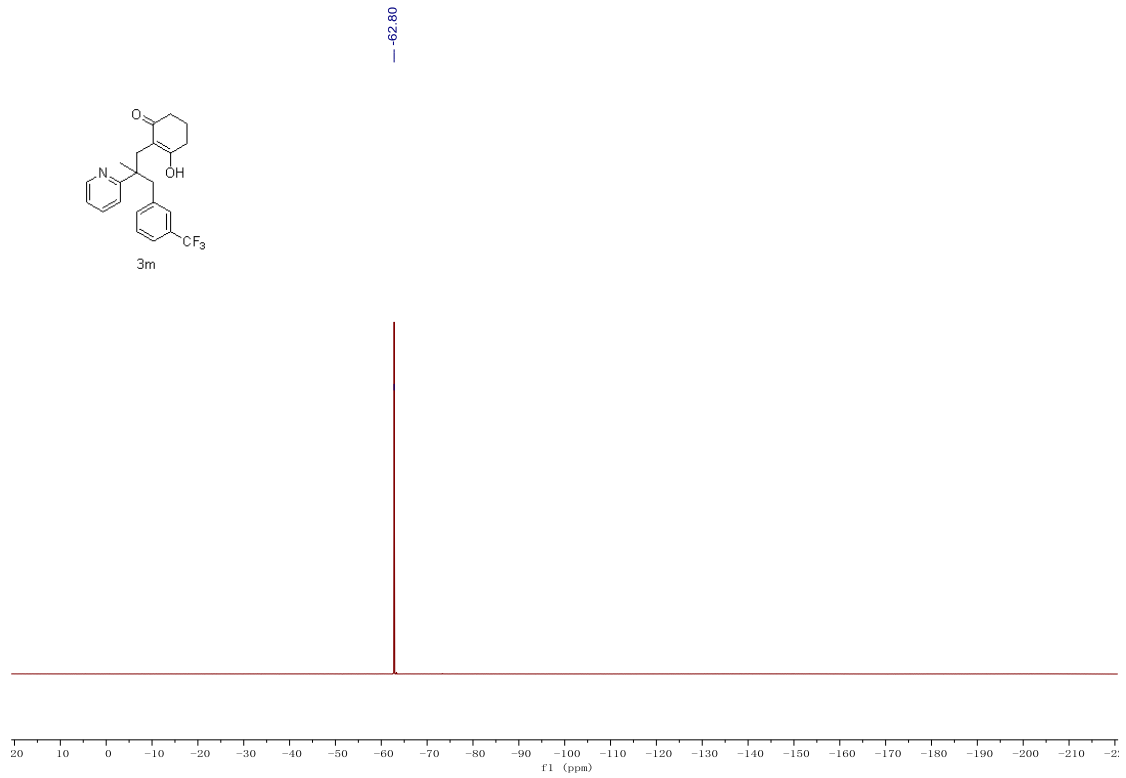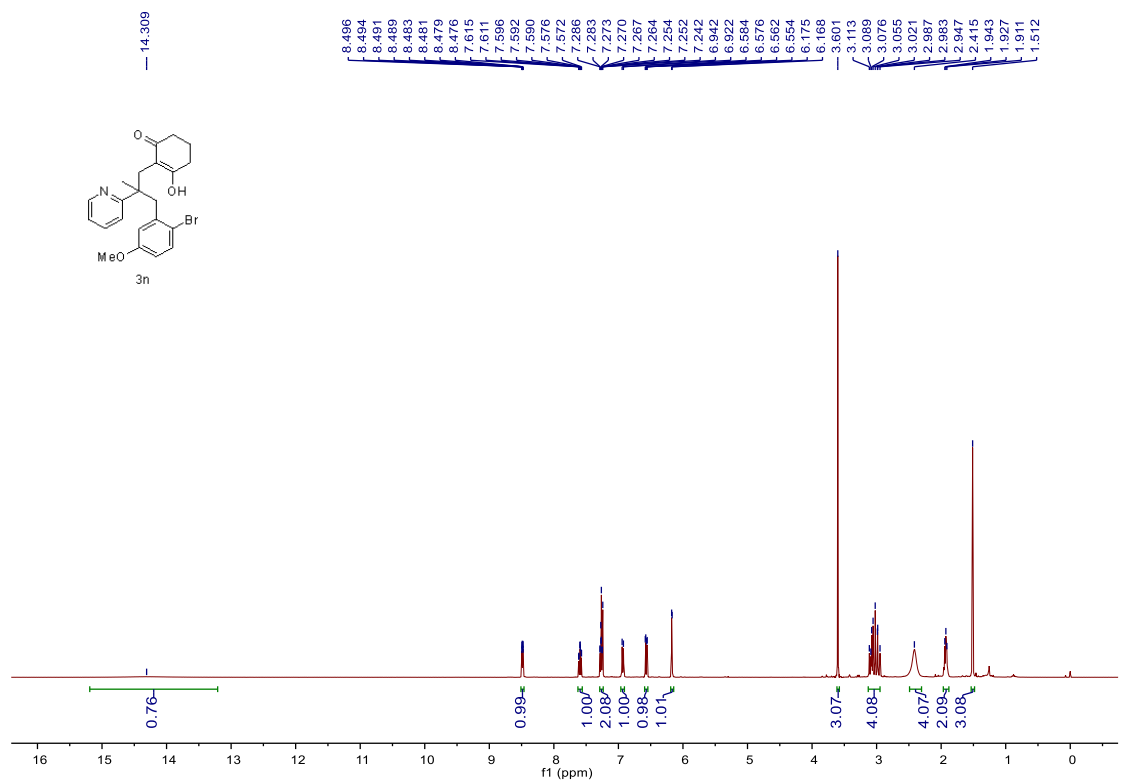



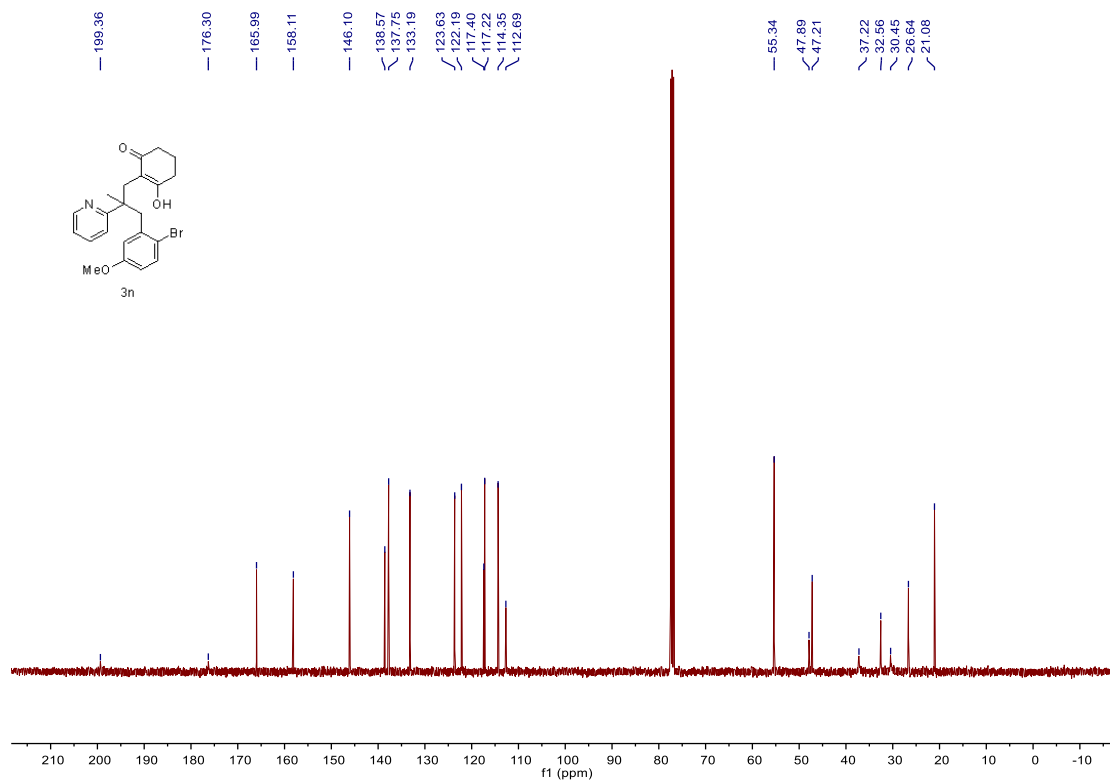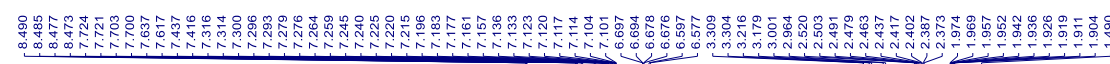

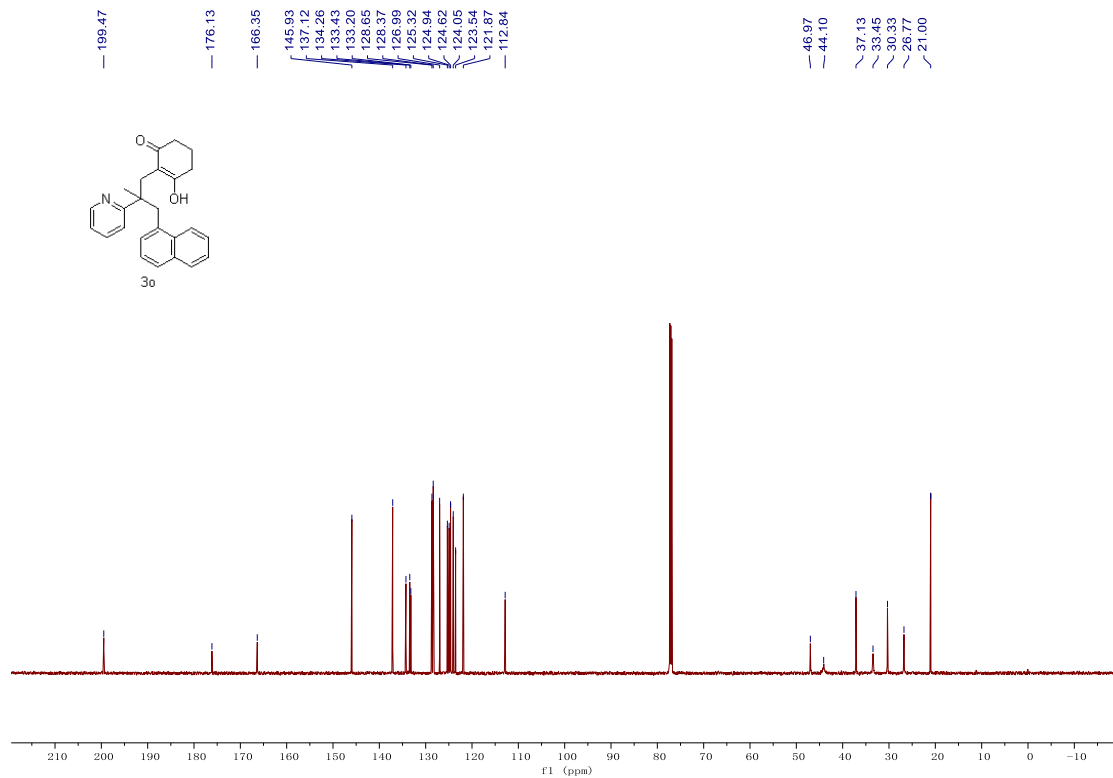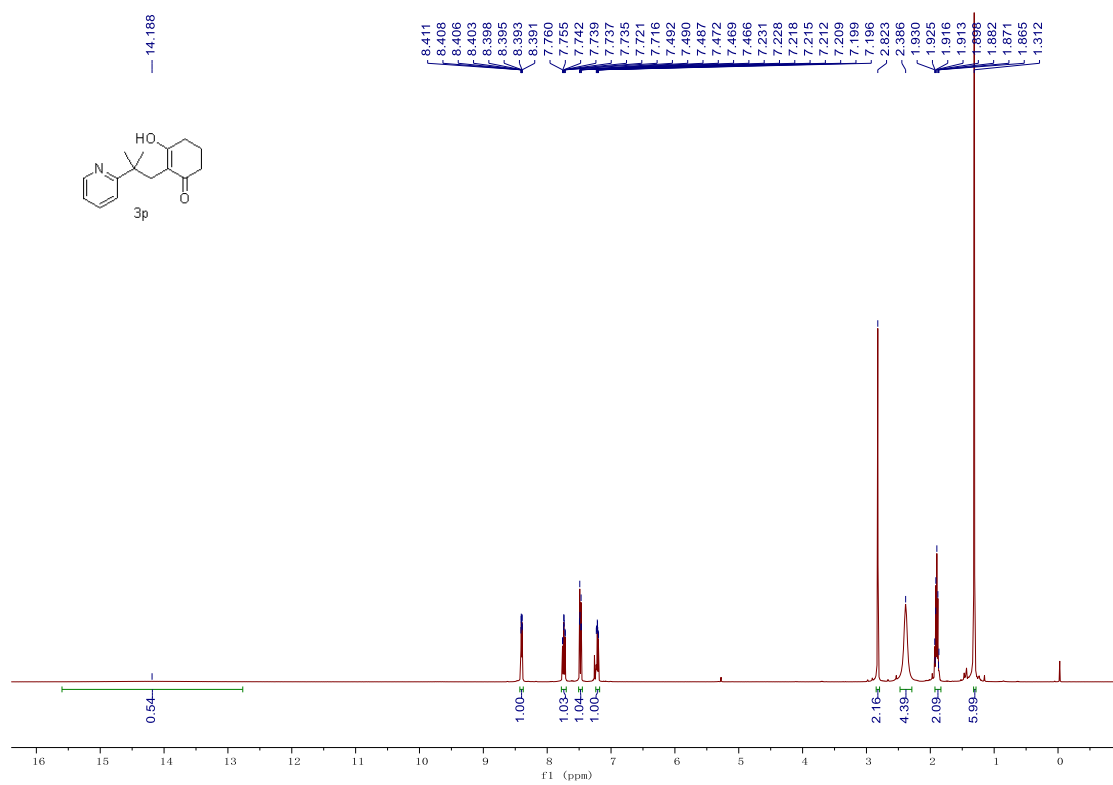

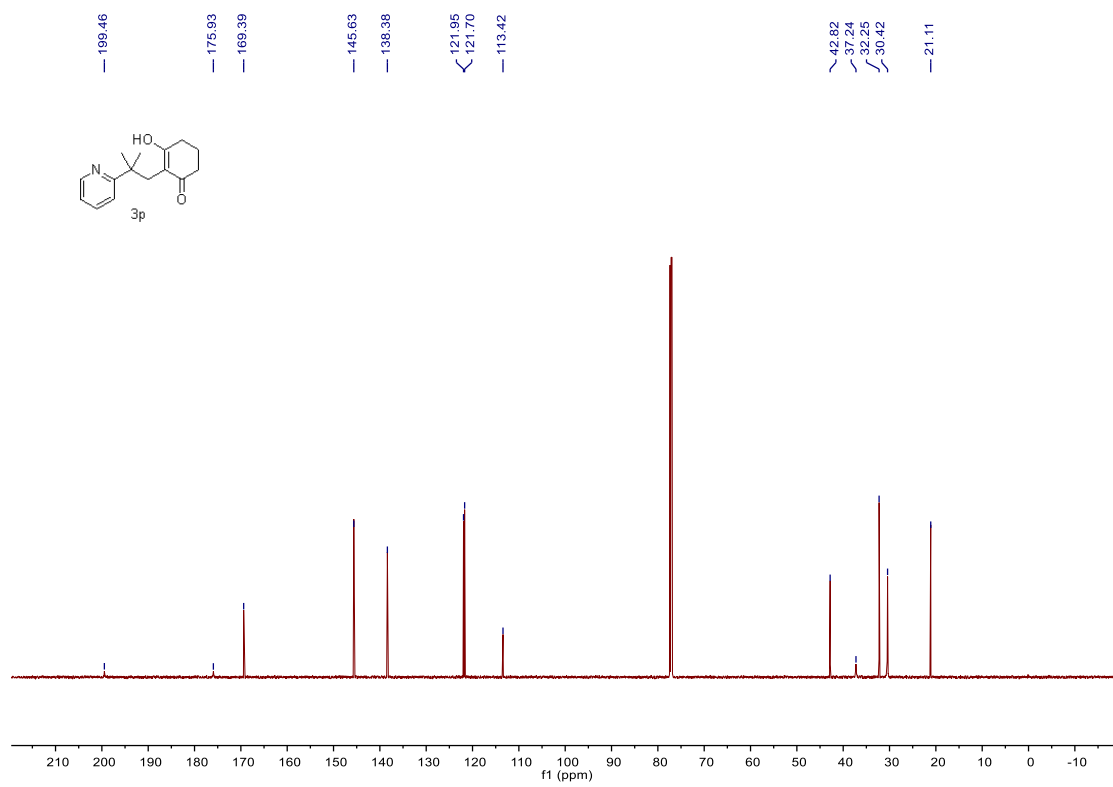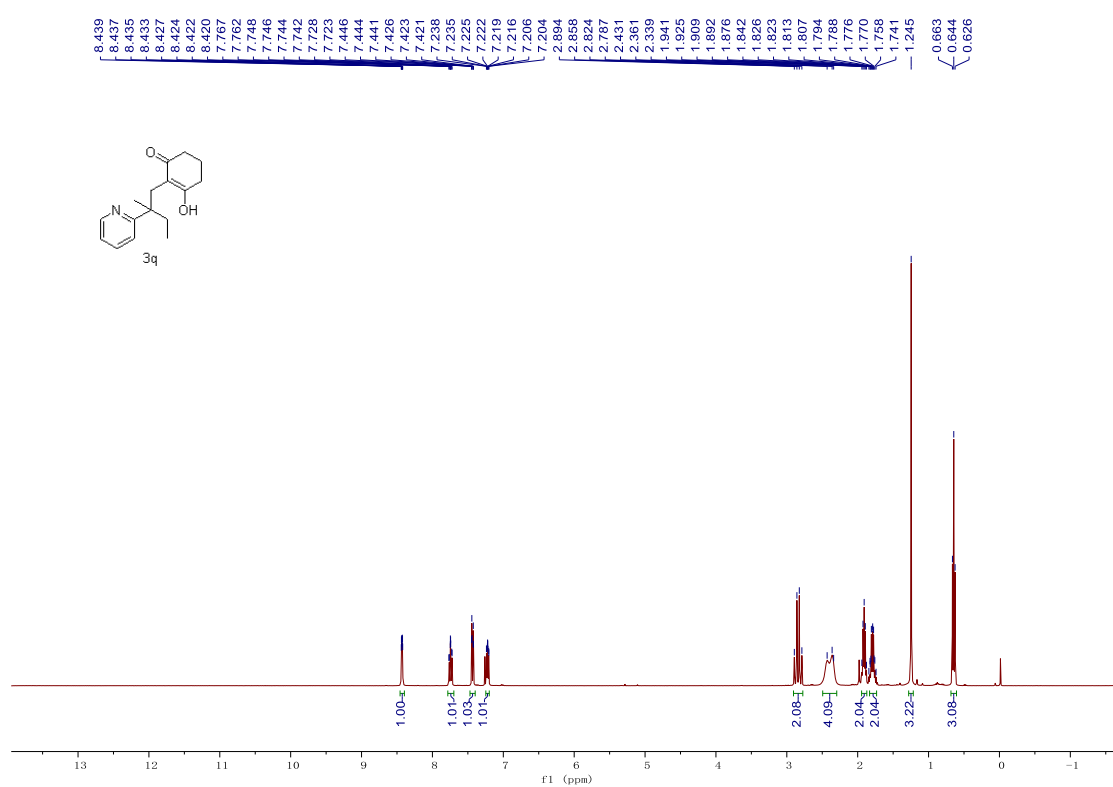

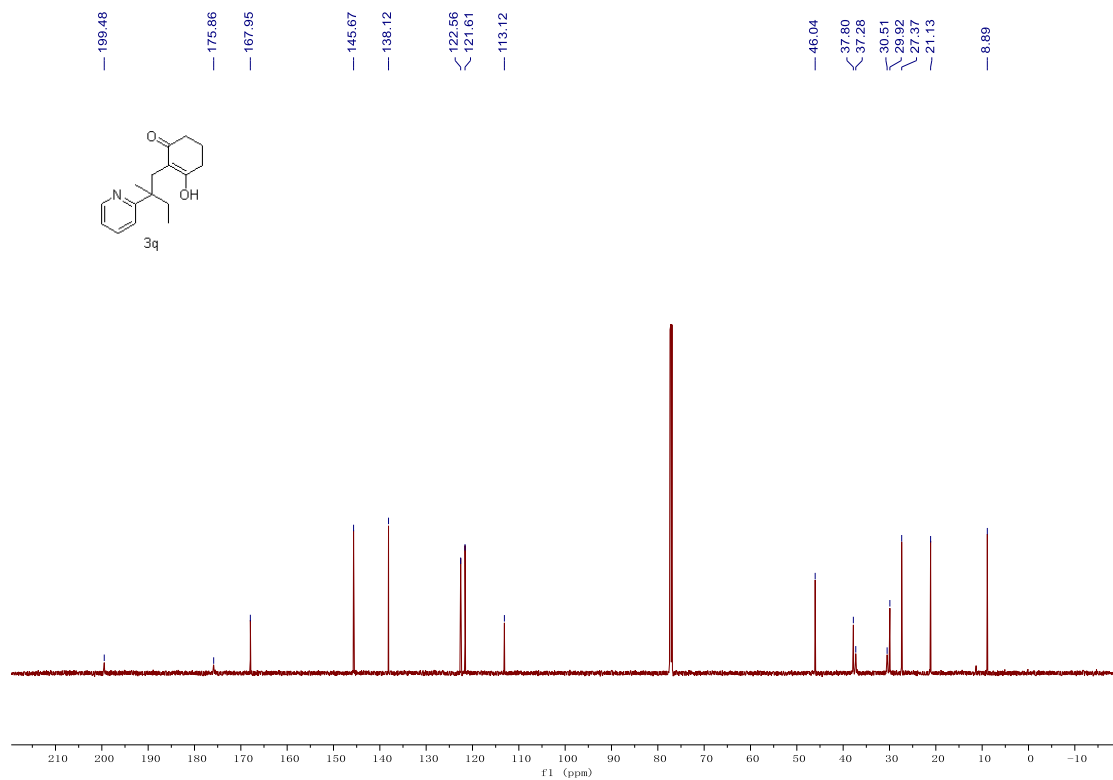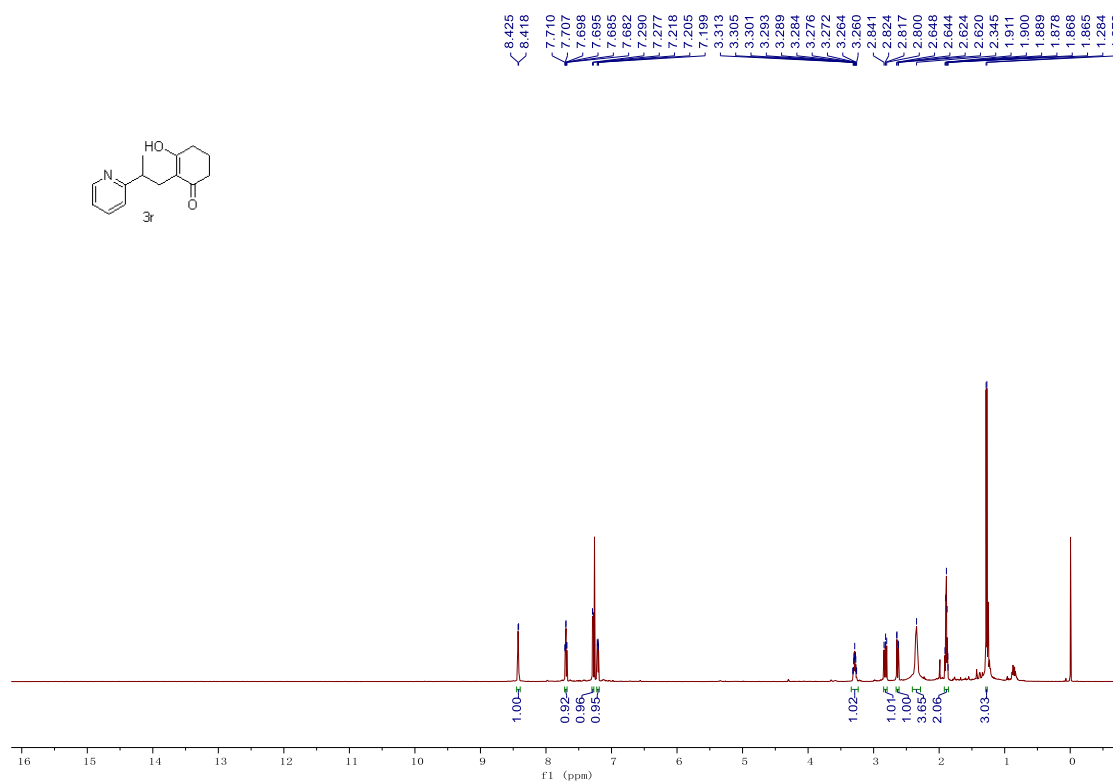

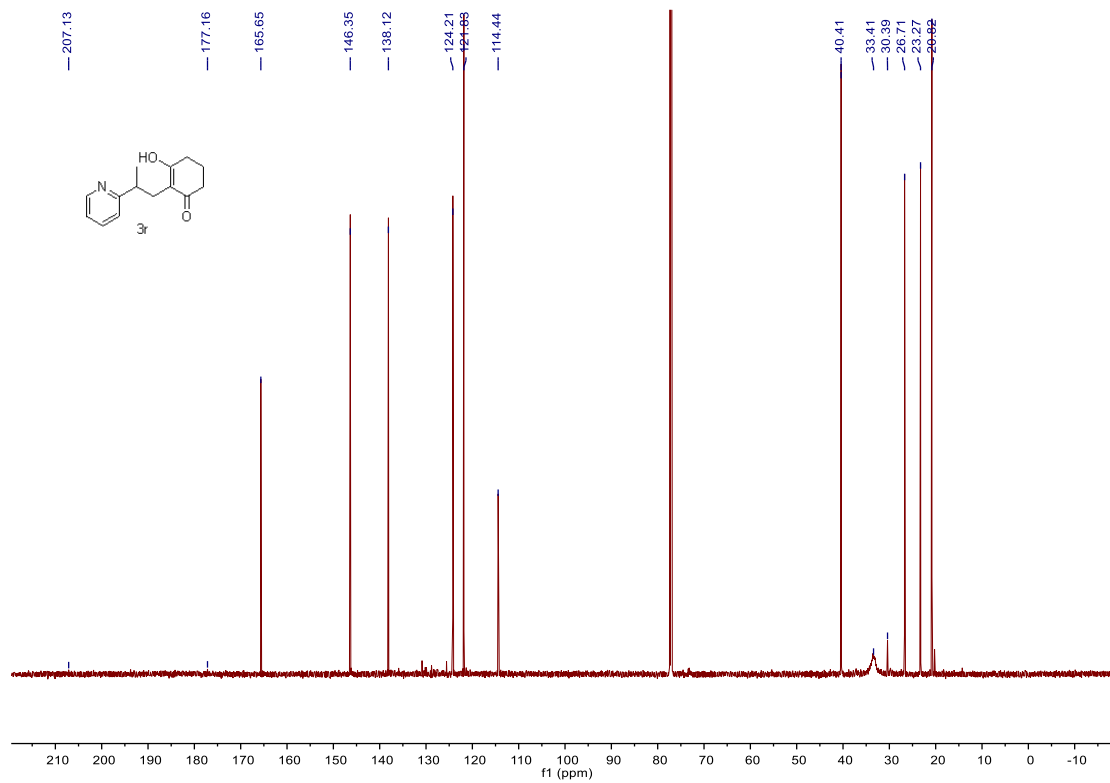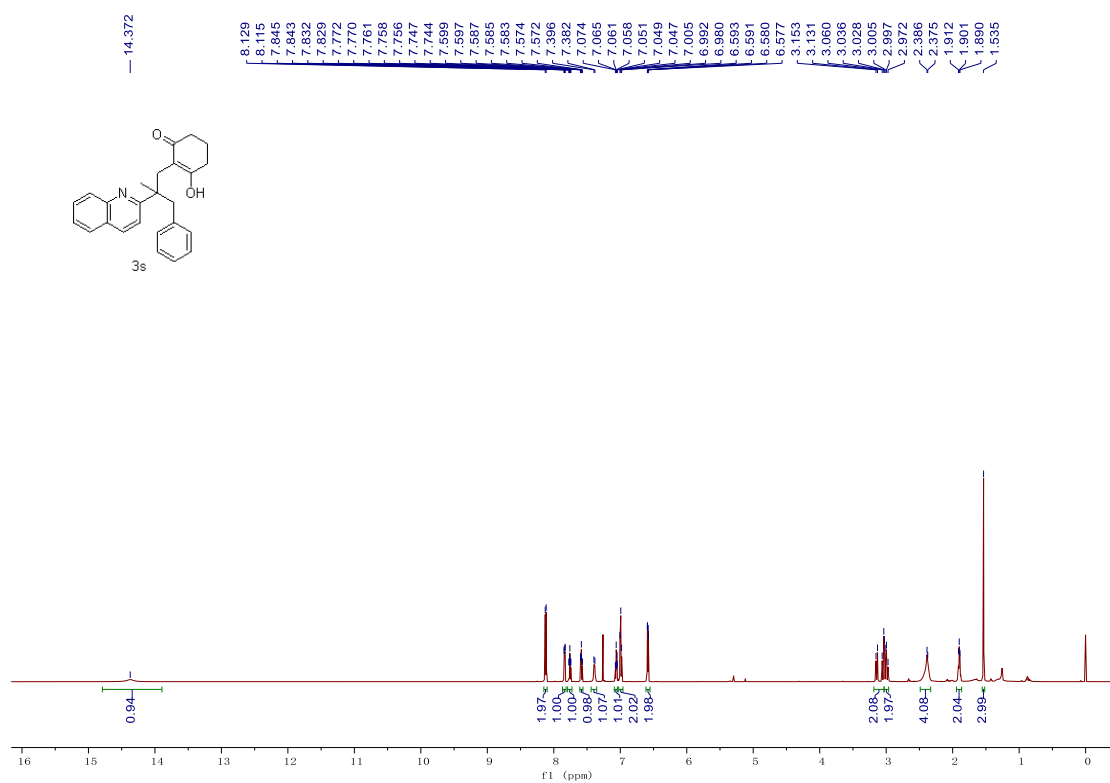

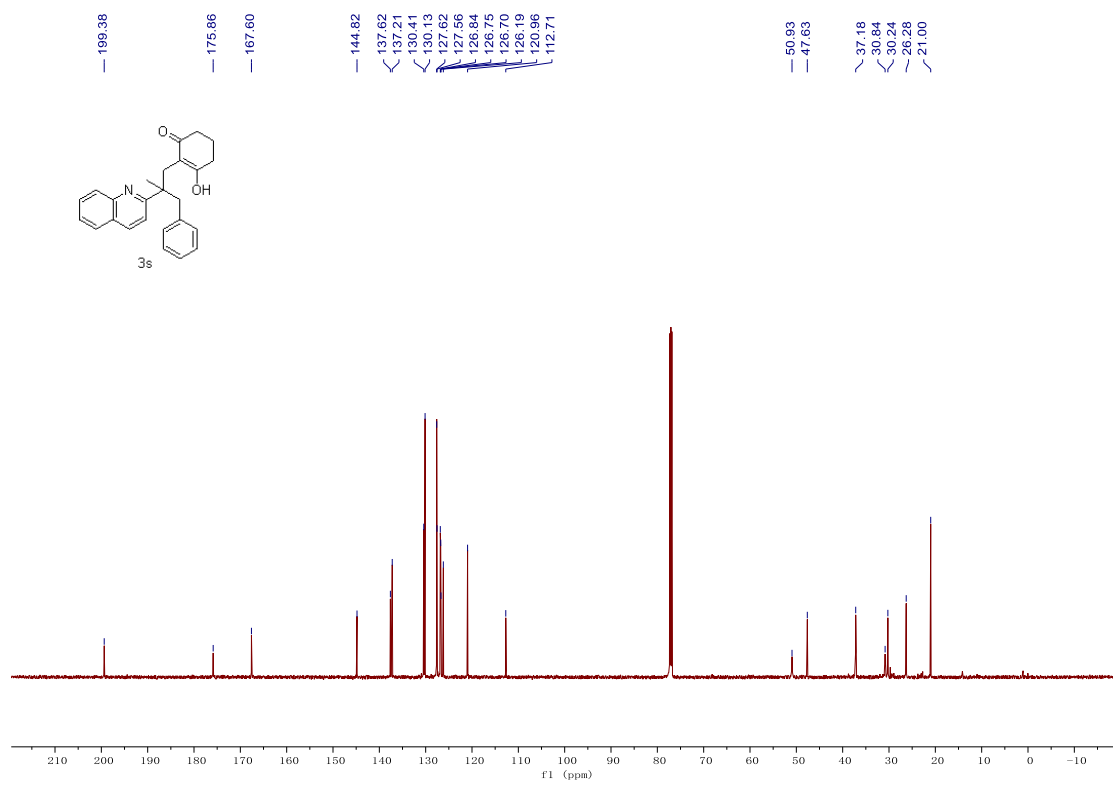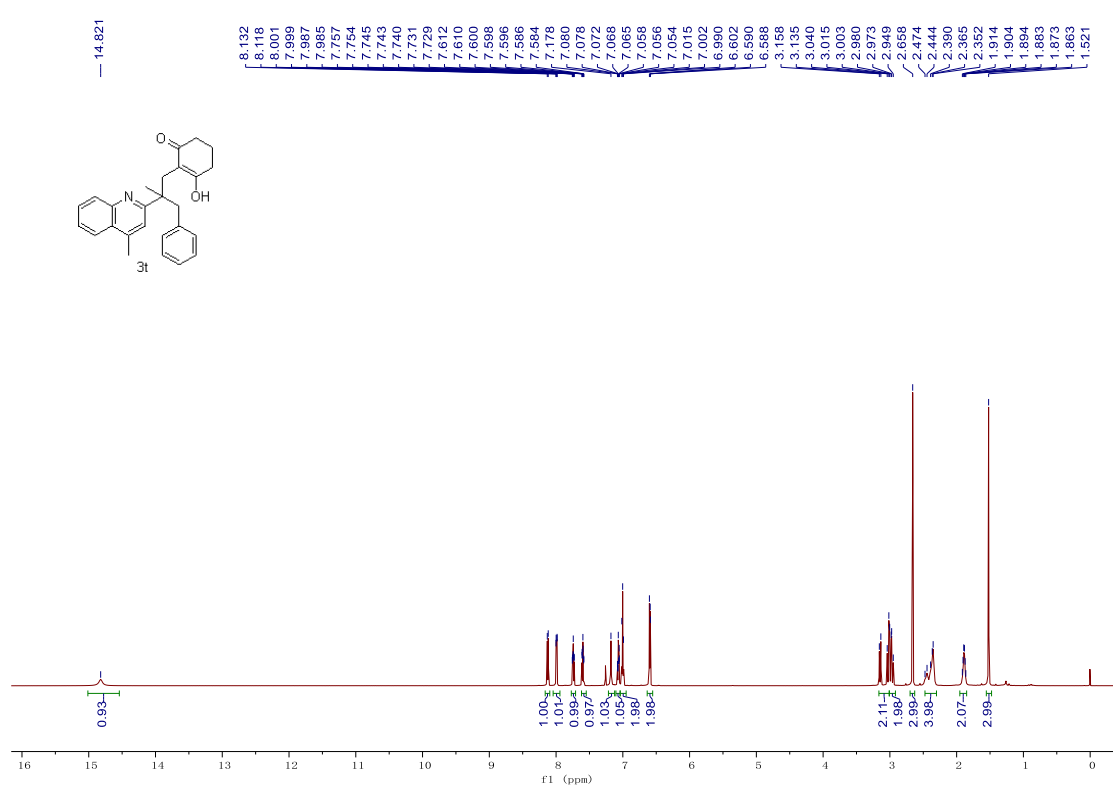

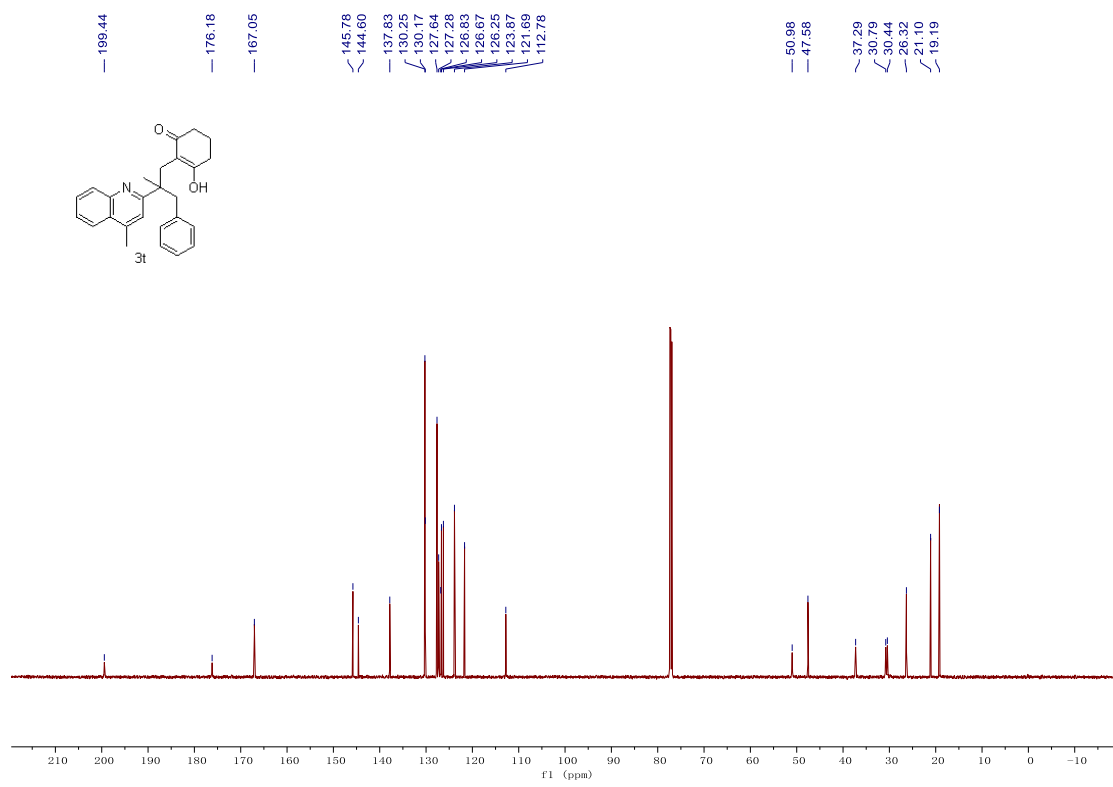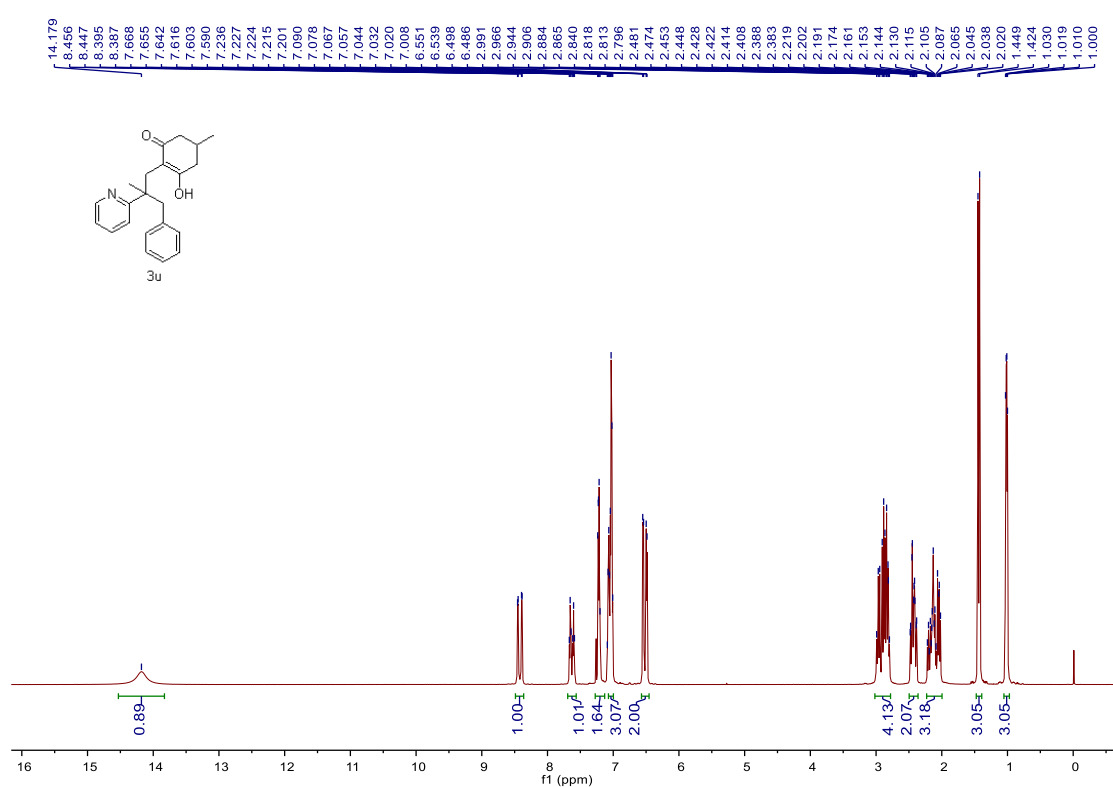

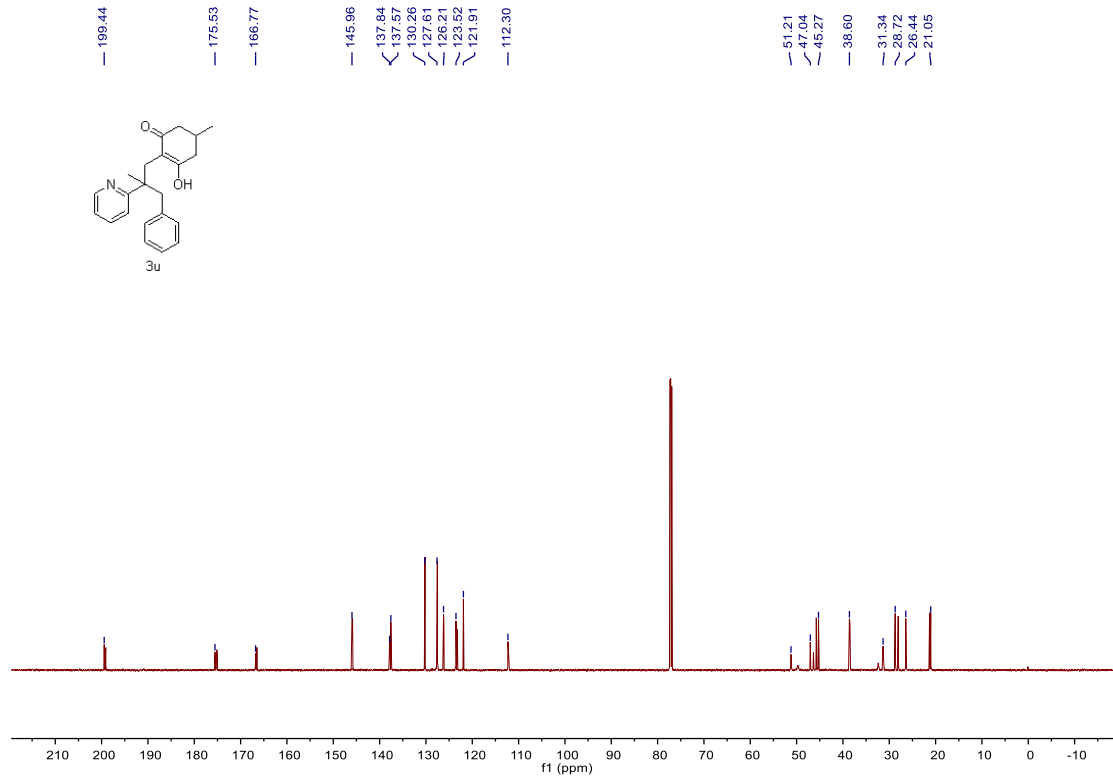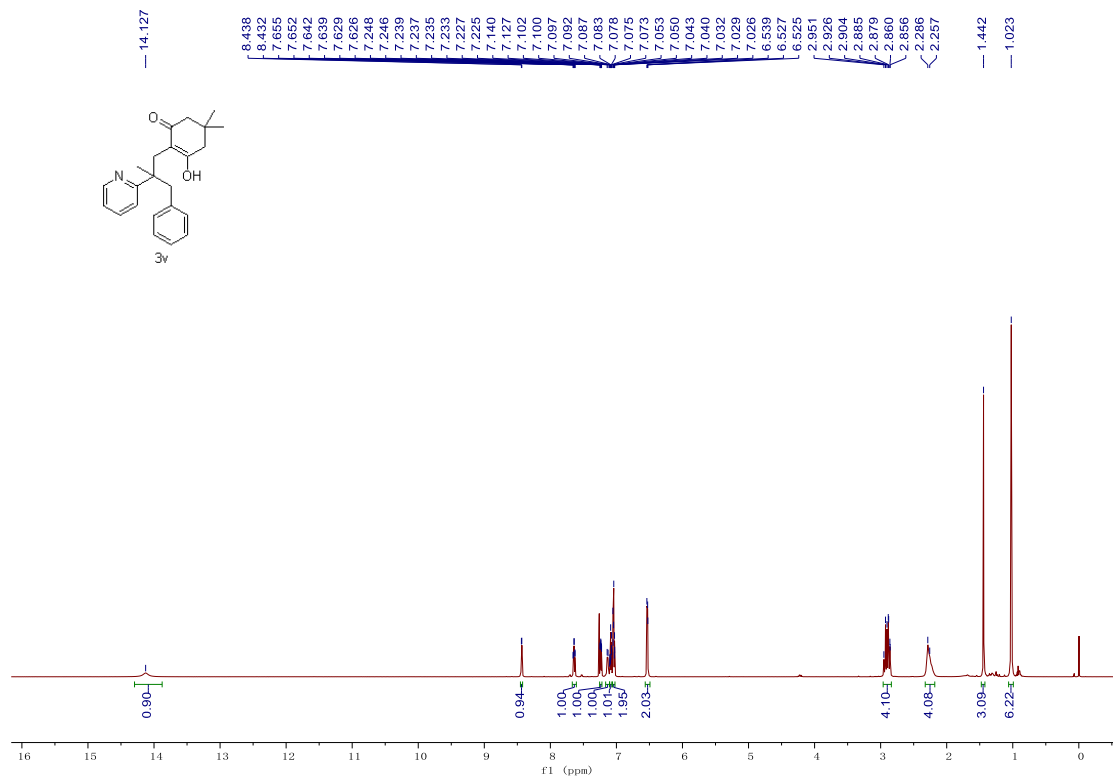



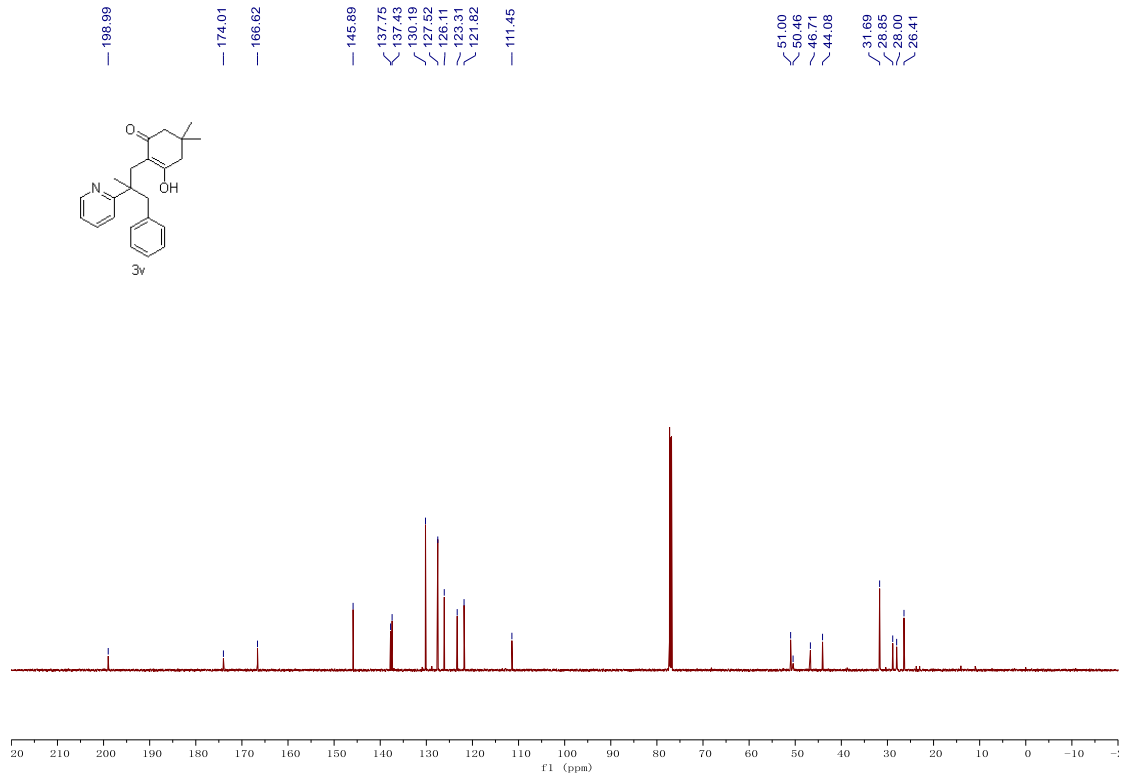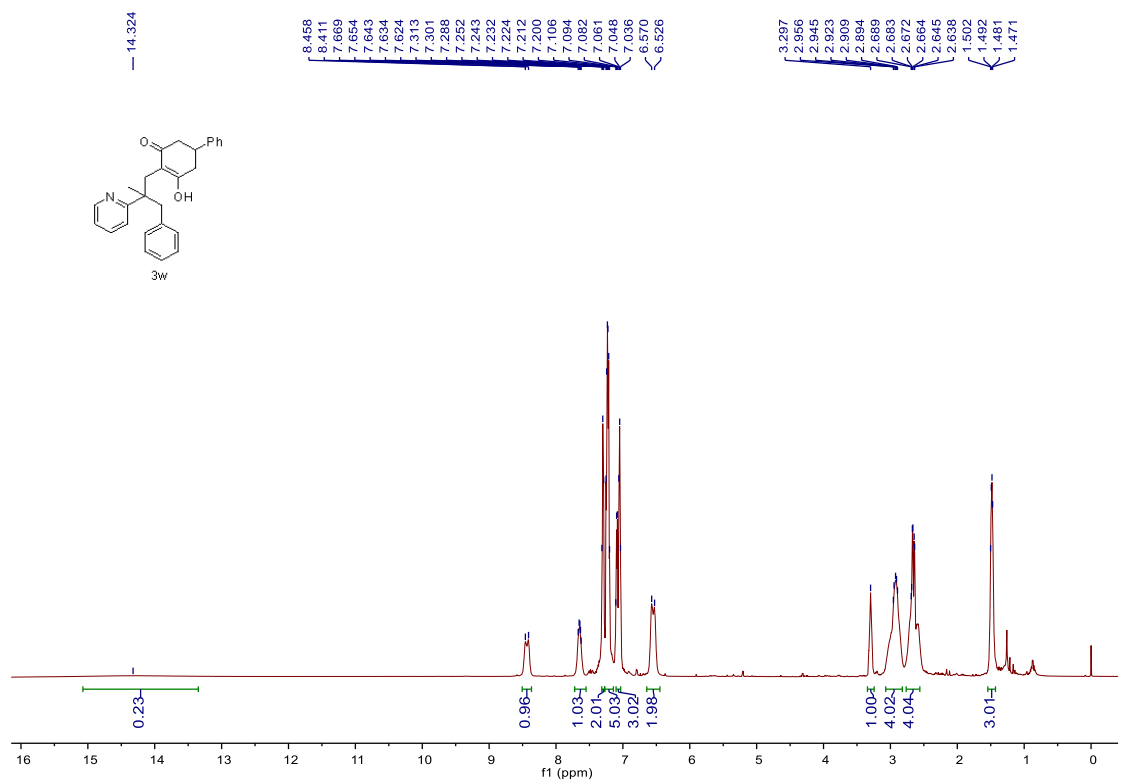

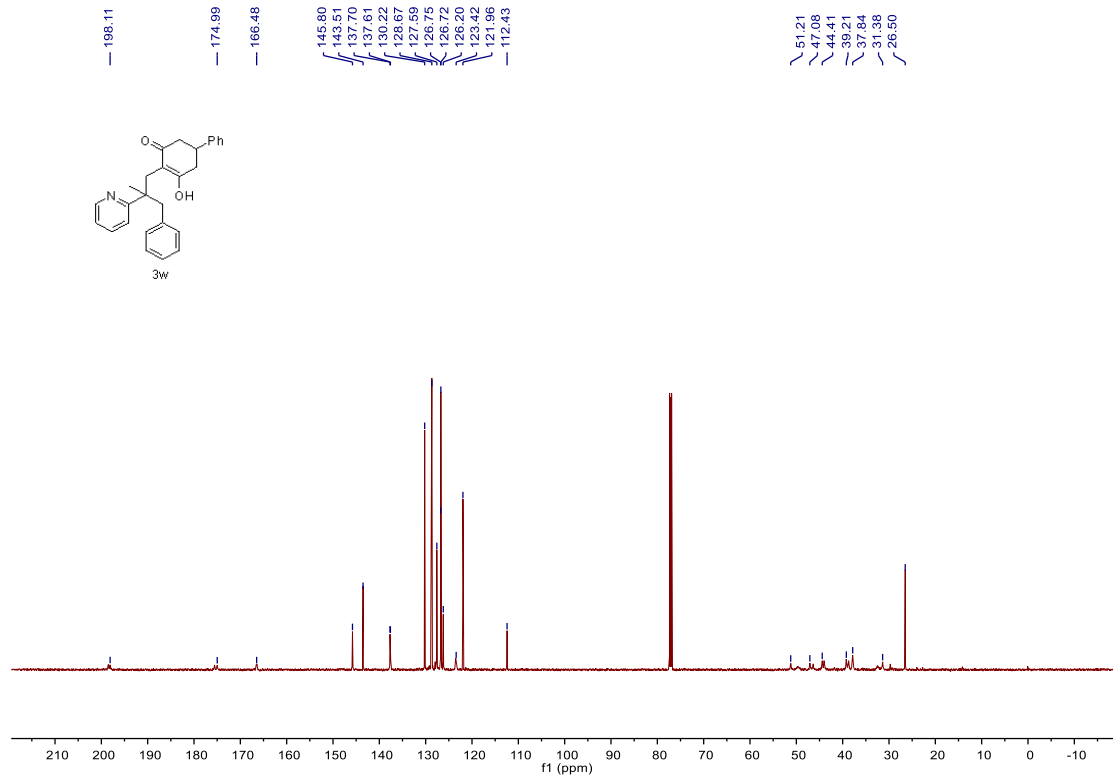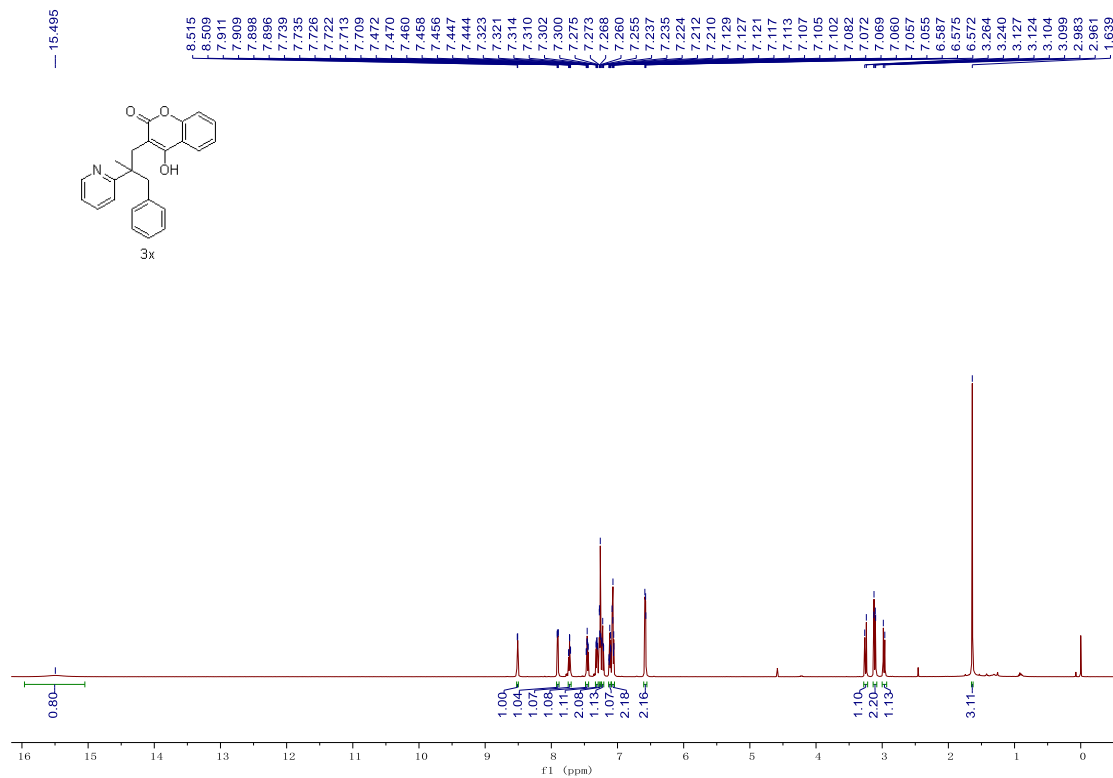

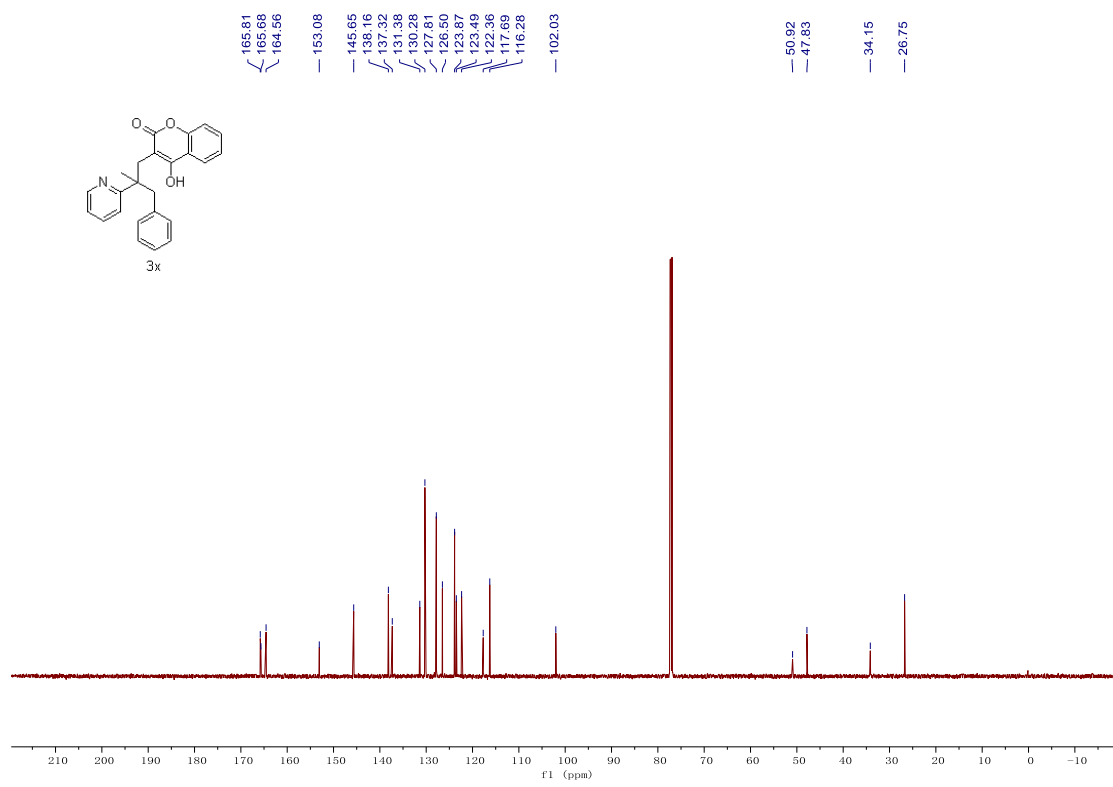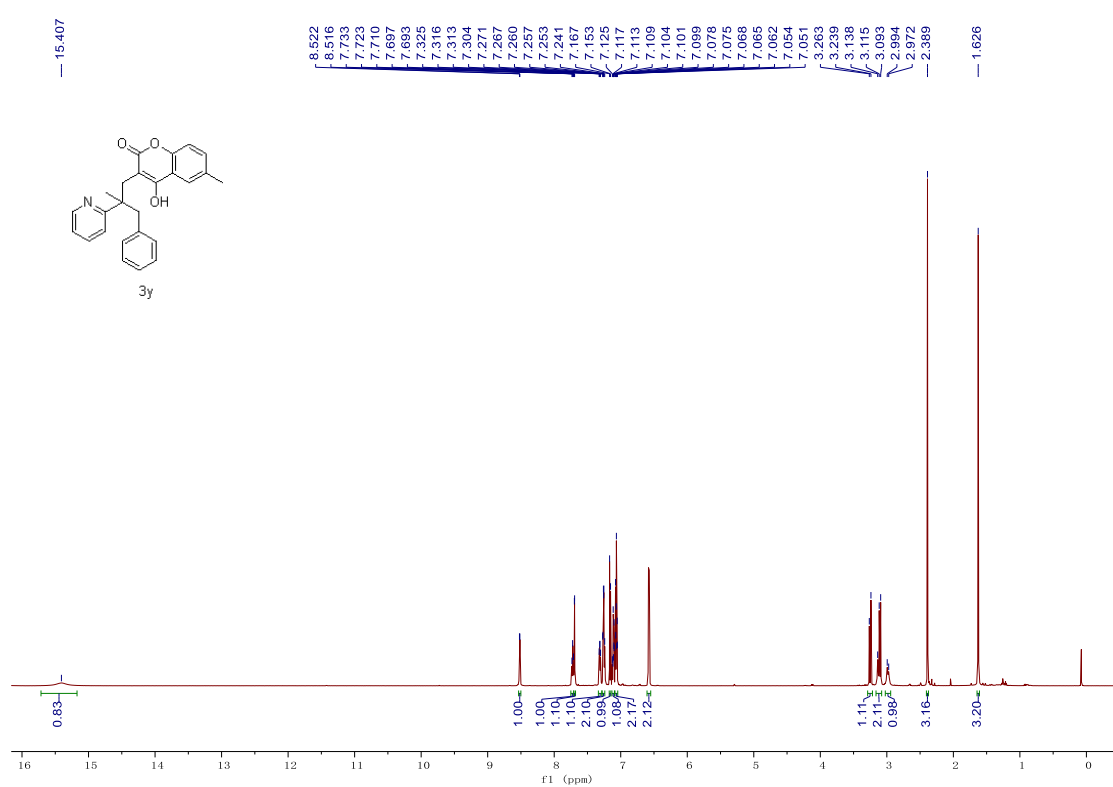

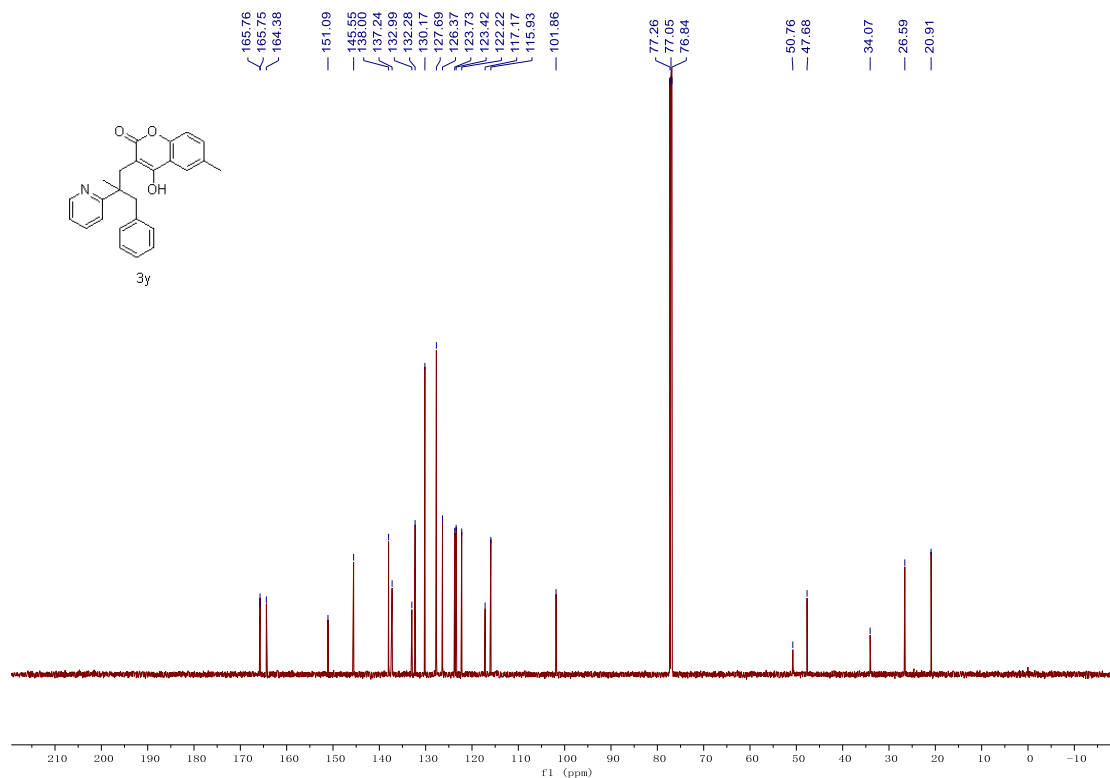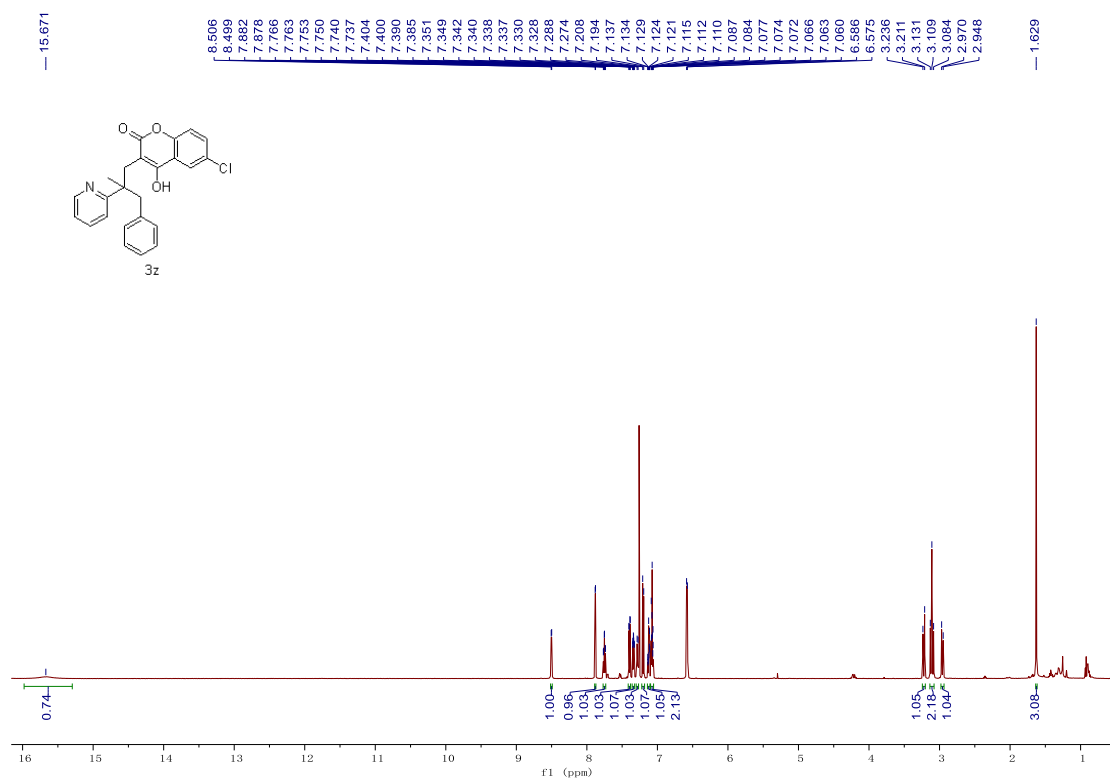

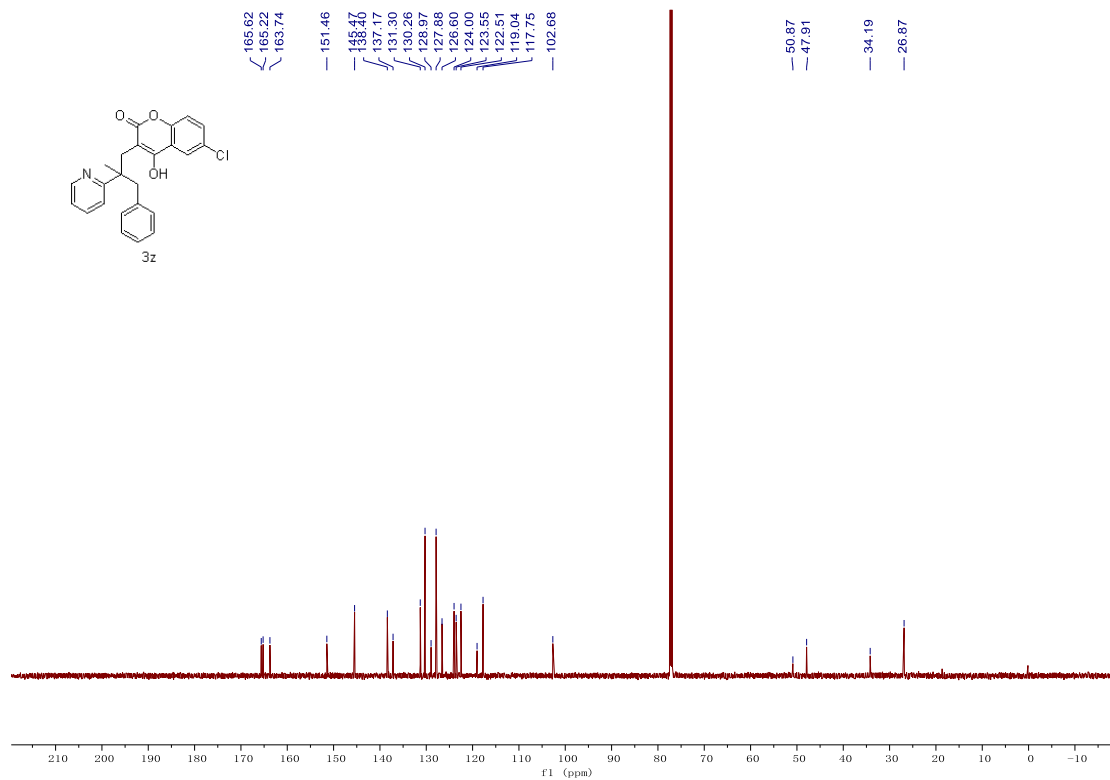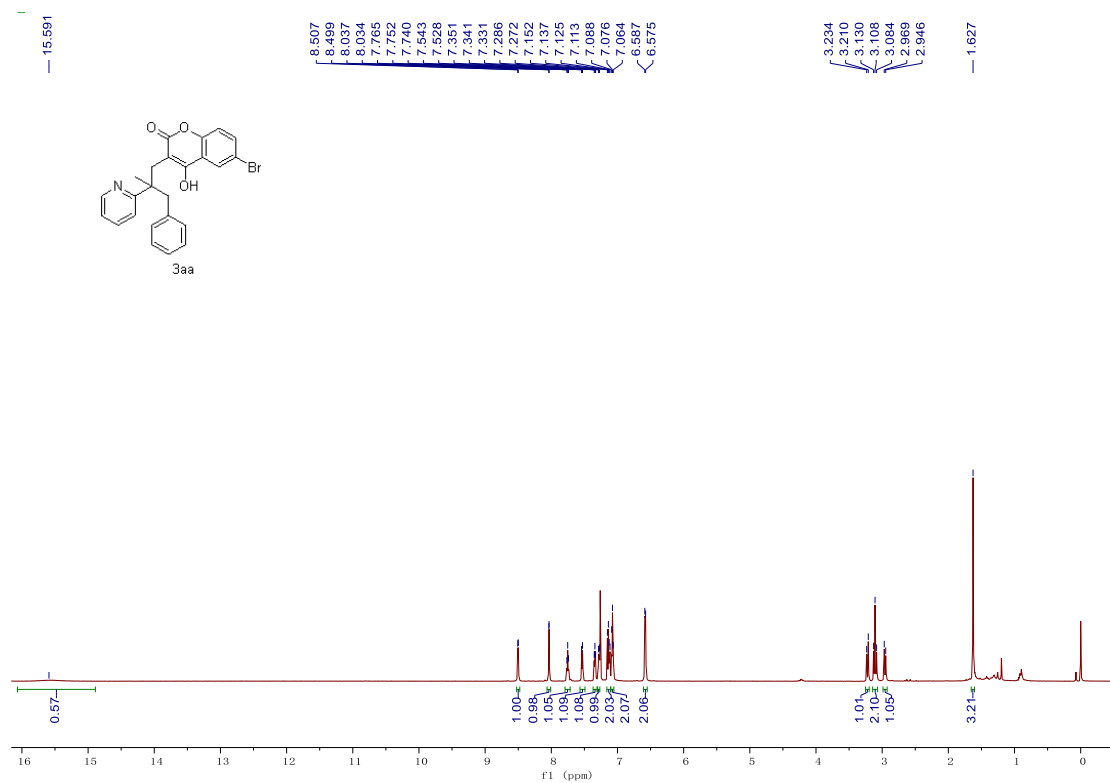

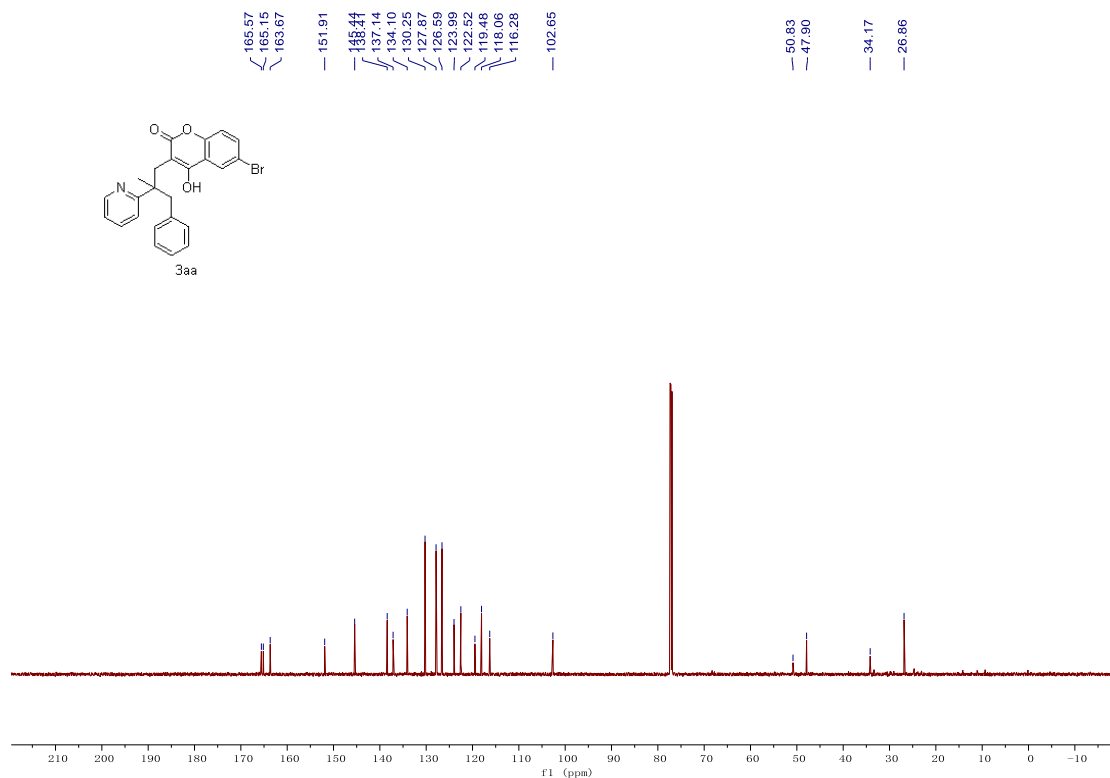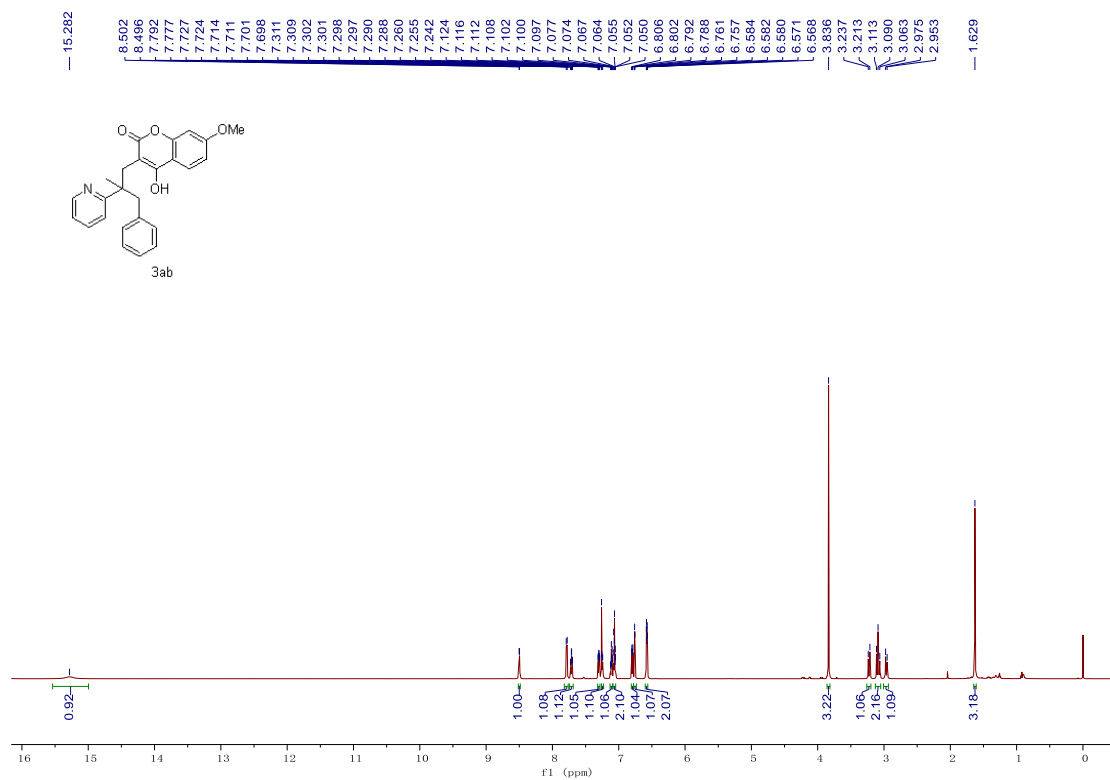

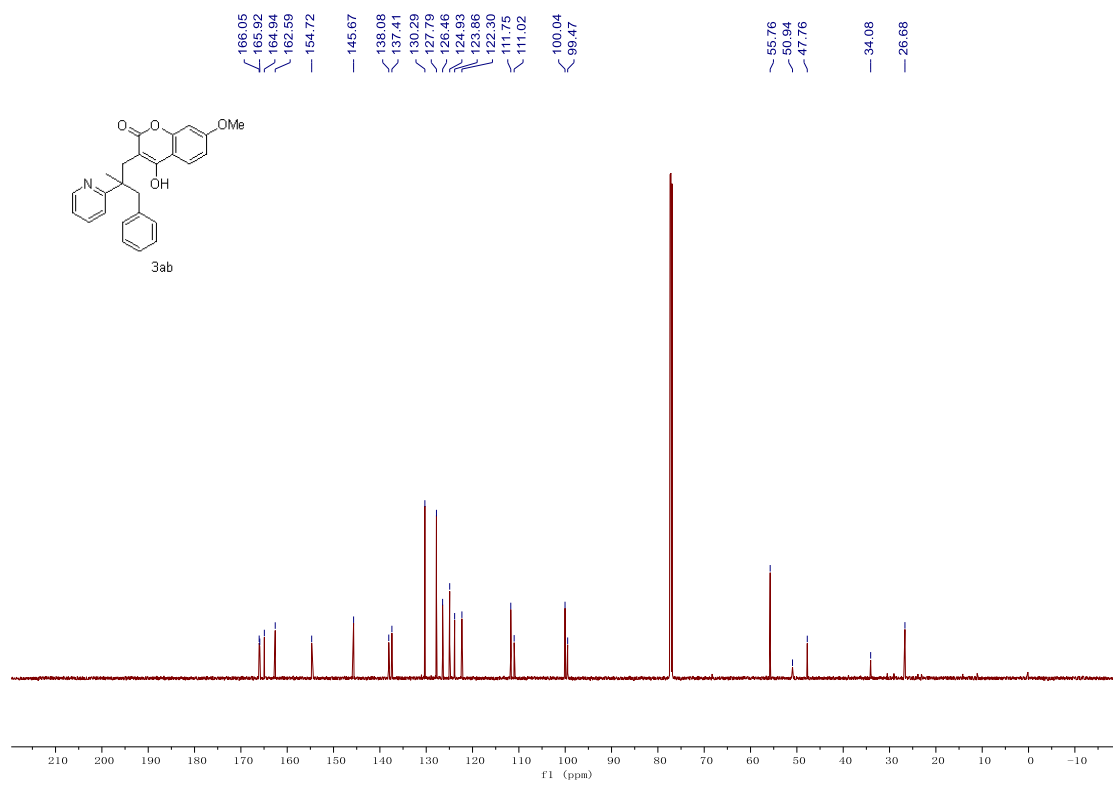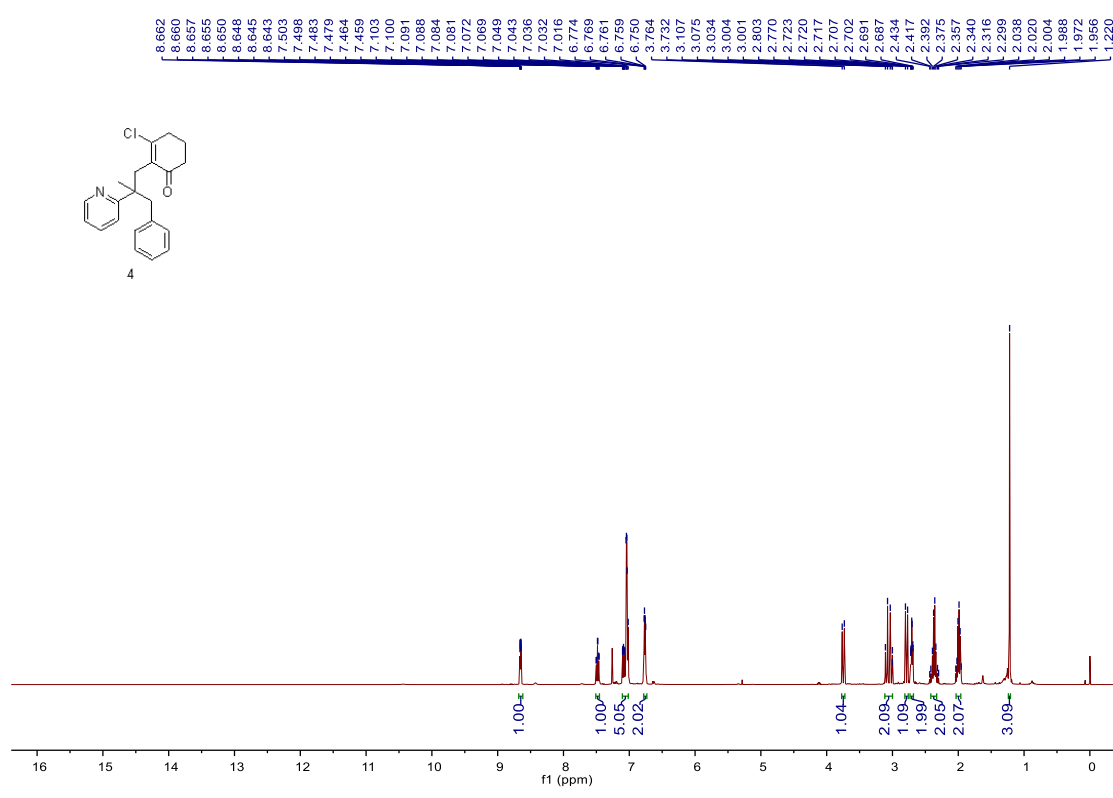

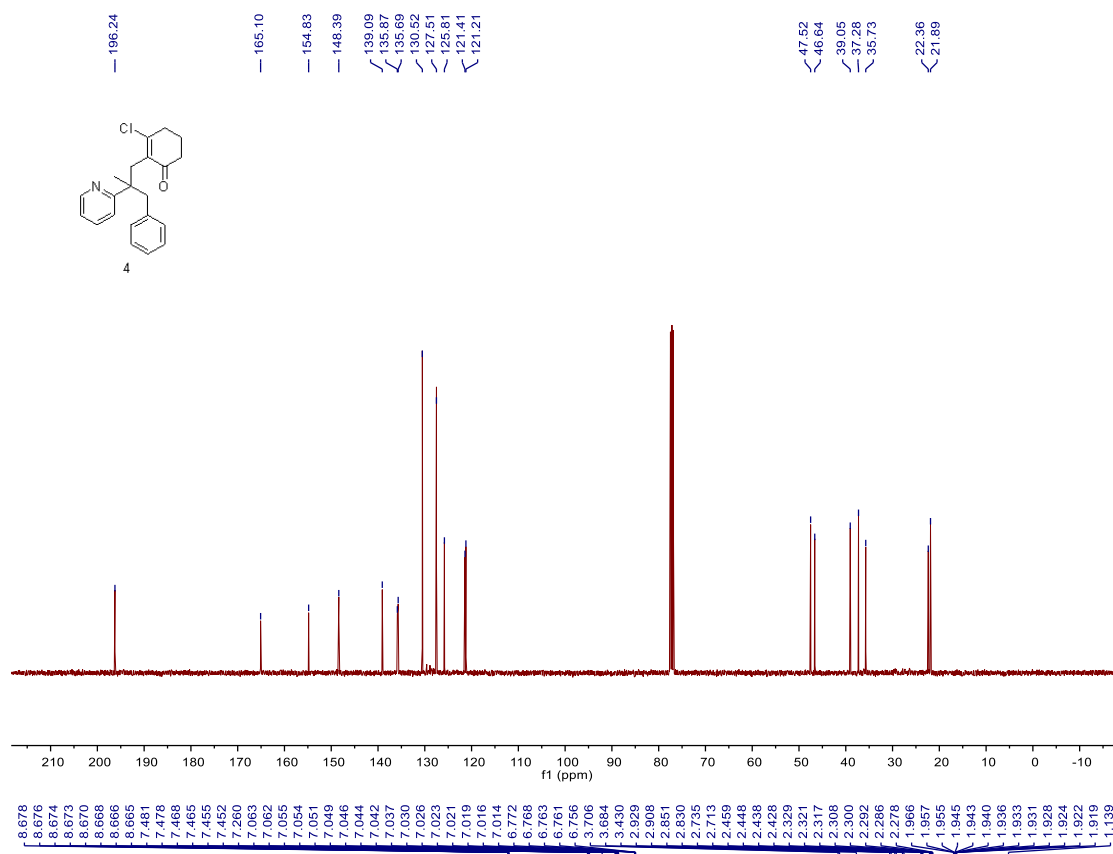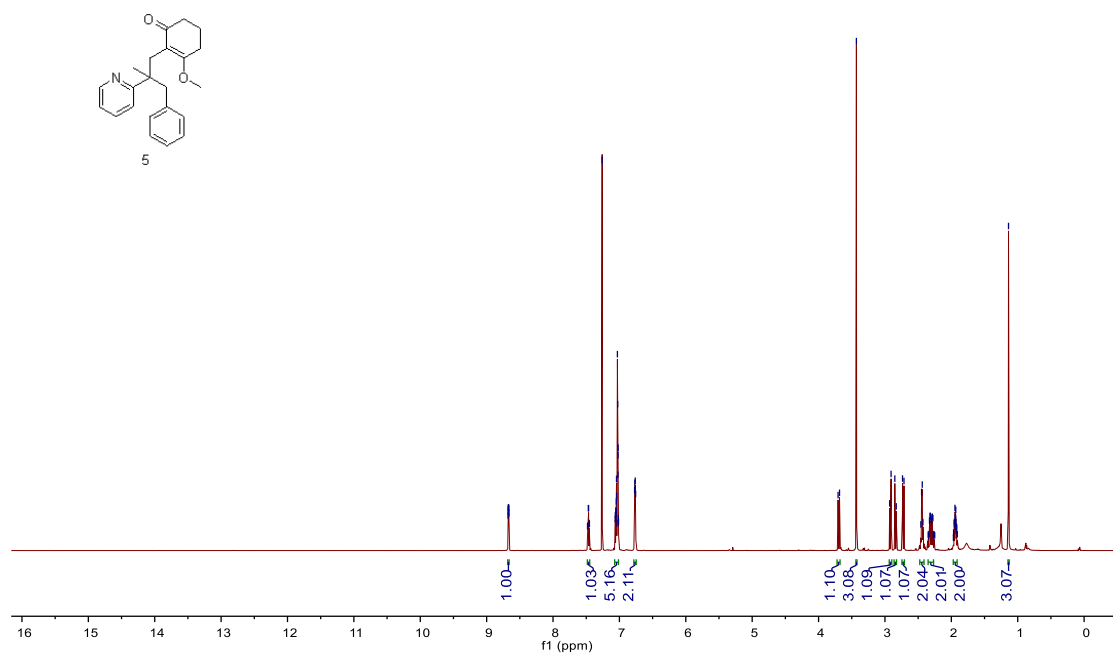



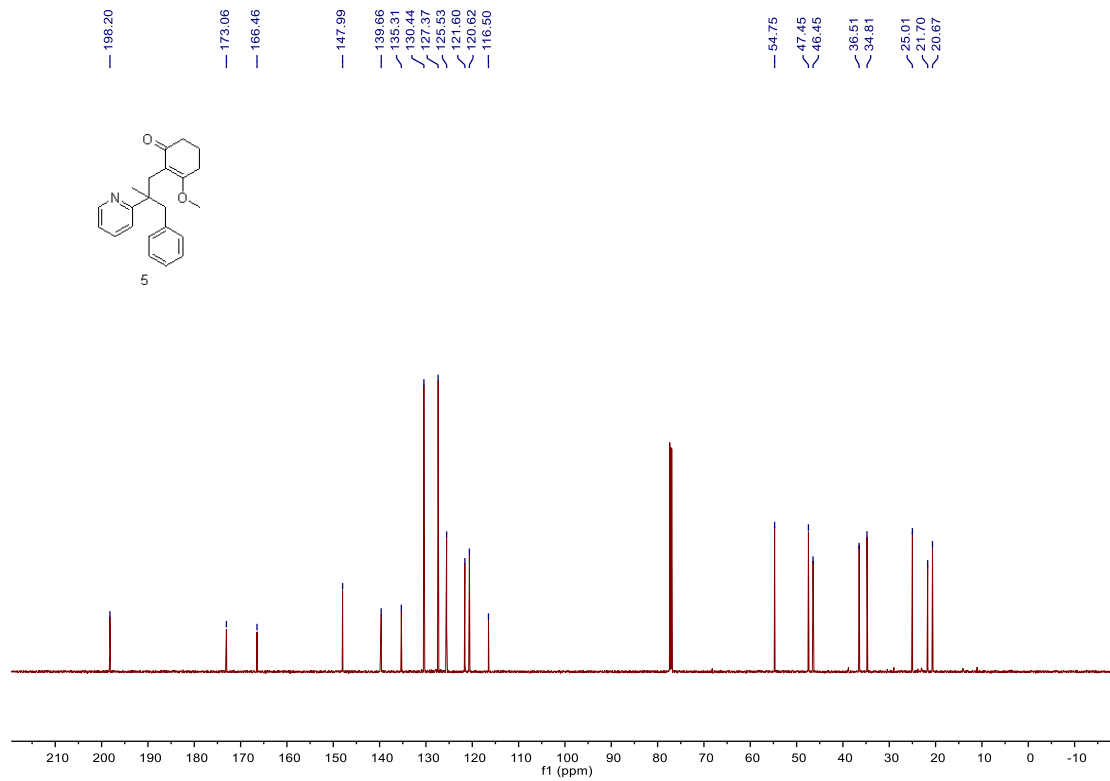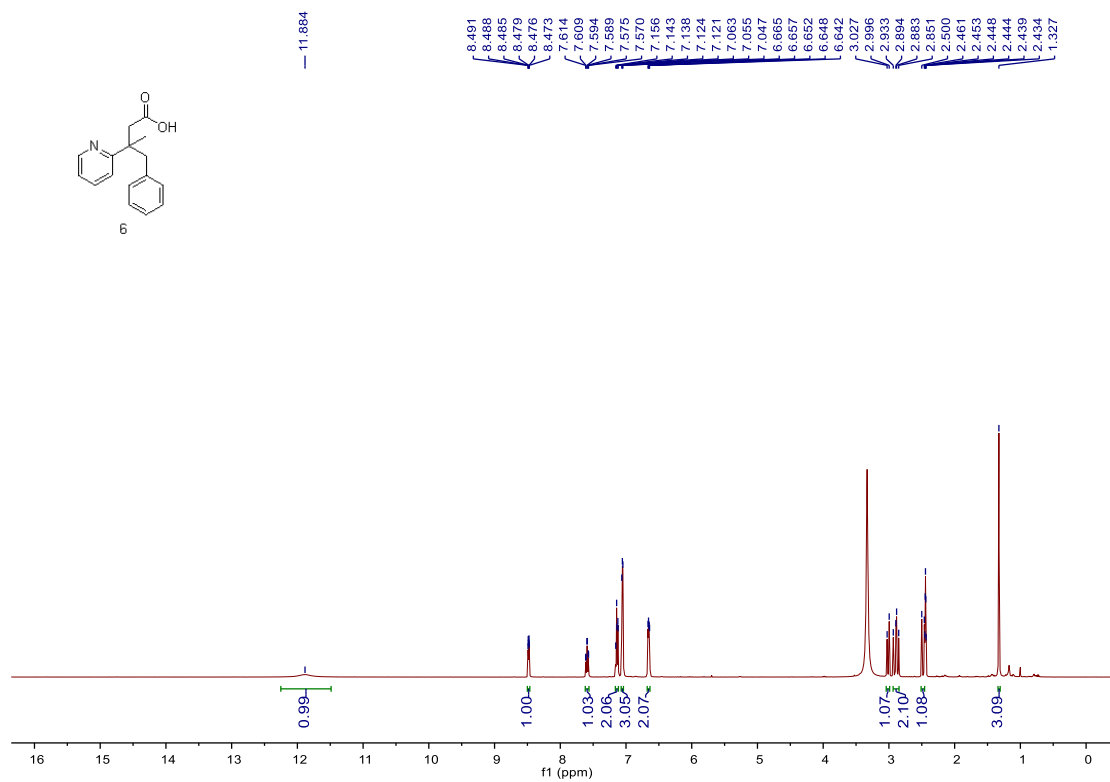

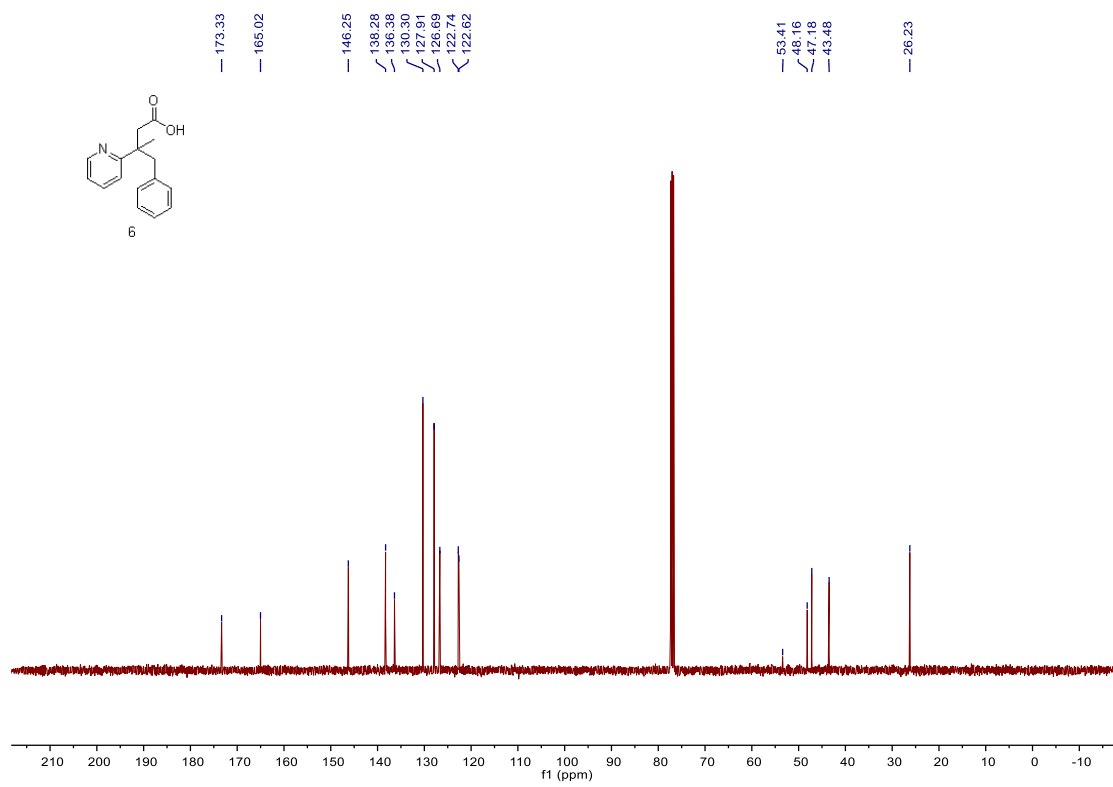

## Mass Spectrum SmartFormula Report

Analysis Info Acquisition D 2022-04-01 10:11:35  
Analysis Name F:\gaofenbian(xiepengfei)\0331\_RE5\_01\_12399.d  
Method LC\_NO UV\_P50-1500\_6MIN.m Operator Demo User  
Sample Name 0331 Instrumen compact 8255754.2017  
6

Comment

Acquisition Paramet  
Source Type ESI Ion Polarity Positive Set Nebulizer 3.0 Bar  
Focus Not active Set Capillary 4000 V Set Dry Heater 200 °C  
Scan Begin 50 m/z Set End Plate -500 V Set Dry Gas 8.0 l/min  
Scan End 1500 m/z Off-charging 2000 V Set Divert Valve Waste  
Voltage 0 nA Set APCI Heater 0 °C

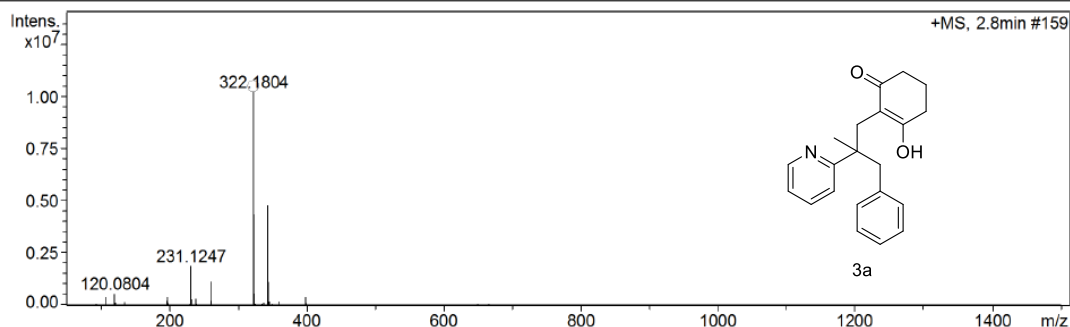

| Meas. m/z | # | Ion Formula | m/z err [ppm] | mSigma | # | mSigma | Score | rdb  | e <sub>i</sub> | Conf | N-Rule |
|-----------|---|-------------|---------------|--------|---|--------|-------|------|----------------|------|--------|
| 322.1804  | 1 | C21H24NO2   | -0.9          | 111.6  | 1 | 100.00 | 11.0  | even |                |      | ok     |

## Mass Spectrum SmartFormula Report

Analysis Info Acquisition D 2022-01-17 23:50:54  
Analysis Name F:\gaofenbian(xiepengfei)\GHX MS\0114\_BD5\_01\_11138.d  
Method LC\_NO UV\_P50-1500\_6MIN.m Operator Demo User  
Sample Name 0114 Instrumen compact 8255754.2017  
6

Comment

Acquisition Paramet  
Source Type ESI Ion Polarity Positive Set Nebulizer 3.0 Bar  
Focus Not active Set Capillary 4000 V Set Dry Heater 200 °C  
Scan Begin 50 m/z Set End Plate -500 V Set Dry Gas 8.0 l/min  
Scan End 1500 m/z Off-charging 2000 V Set Divert Valve Waste  
Voltage 0 nA Set APCI Heater 0 °C

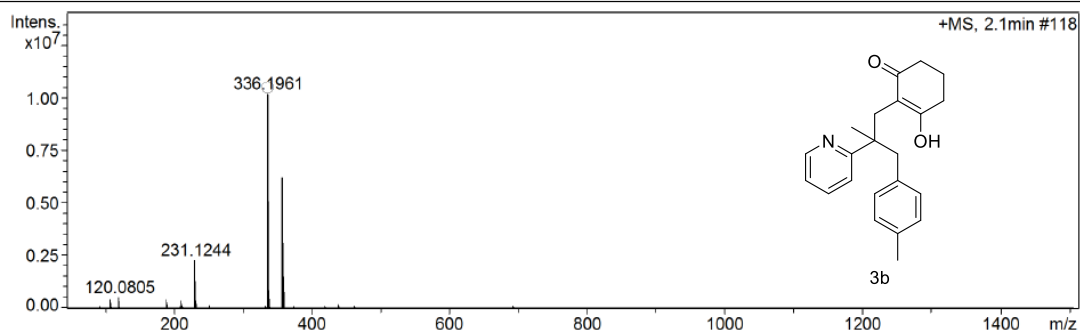

| Meas. m/z | # | Ion Formula | m/z err [ppm] | mSigma | # | mSigma | Score | rdb  | e <sub>i</sub> | Conf | N-Rule |
|-----------|---|-------------|---------------|--------|---|--------|-------|------|----------------|------|--------|
| 336.1961  | 1 | C22H26NO2   | -0.8          | 229.4  | 1 | 100.00 | 11.0  | even |                |      | ok     |

## Mass Spectrum SmartFormula Report

**Analysis Info** Acquisition D 2022-01-18 0:20:34  
 Analysis Name F:\gaofenbian(xiepengfei)\GHX MS\0114\_BE1\_01\_11142.d  
 Method LC\_NO UV\_P50-1500\_6MIN.m Operator Demo User  
 Sample Name 0114 Instrument compact 8255754.2017

Comment

**Acquisition Paramet**  
 Source Type ESI Ion Polarity Positive Set Nebulizer 3.0 Bar  
 Focus Not active Set Capillary 4000 V Set Dry Heater 200 °C  
 Scan Begin 50 m/z Set End Plate -500 V Set Dry Gas 8.0 l/min  
 Scan End 1500 m/z Offset charging 2000 V Set Divert Valve Waste  
Voltage 0 nA Set APCI Heater 0 °C

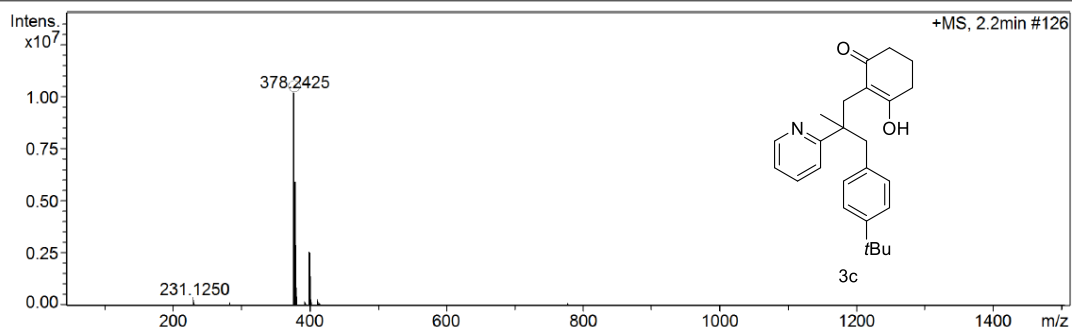

| Meas. m/z | # | Ion Formula | m/z err [ppm] | mSigma | #     | mSigma | Score  | rdb  | ej   | Conf | N-Rule |
|-----------|---|-------------|---------------|--------|-------|--------|--------|------|------|------|--------|
| 378.2425  | 1 | C25H32NO2   | 378.2428      | 0.8    | 177.9 | 1      | 100.00 | 11.0 | even |      | ok     |

## Mass Spectrum SmartFormula Report

**Analysis Info** Acquisition D 2022-01-17 23:43:33  
 Analysis Name F:\gaofenbian(xiepengfei)\GHX MS\0114\_BD4\_01\_11137.d  
 Method LC\_NO UV\_P50-1500\_6MIN.m Operator Demo User  
 Sample Name 0114 Instrument compact 8255754.2017

Comment

**Acquisition Paramet**  
 Source Type ESI Ion Polarity Positive Set Nebulizer 3.0 Bar  
 Focus Not active Set Capillary 4000 V Set Dry Heater 200 °C  
 Scan Begin 50 m/z Set End Plate -500 V Set Dry Gas 8.0 l/min  
 Scan End 1500 m/z Offset charging 2000 V Set Divert Valve Waste  
Voltage 0 nA Set APCI Heater 0 °C

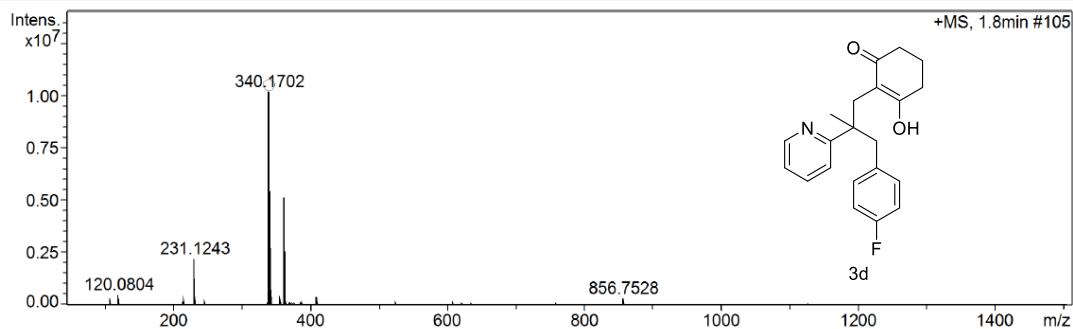

| Meas. m/z | # | Ion Formula | m/z err [ppm] | mSigma | #     | mSigma | Score  | rdb  | ej   | Conf | N-Rule |
|-----------|---|-------------|---------------|--------|-------|--------|--------|------|------|------|--------|
| 340.1702  | 1 | C21H23FNO2  | 340.1707      | 1.5    | 174.9 | 1      | 100.00 | 11.0 | even |      | ok     |

## Mass Spectrum SmartFormula Report

**Analysis Info** Acquisition D 2022-01-17 22:42:55  
 Analysis Name F:\gaofenbian(xiepengfei)\GHX MS\0114\_BC4\_01\_11129.d  
 Method LC\_NO UV\_P50-1500\_6MIN.m Operator Demo User  
 Sample Name 0114 Instrument compact 8255754.2017  
6

Comment

**Acquisition Paramet**  
 Source Type ESI Ion Polarity Positive Set Nebulizer 3.0 Bar  
 Focus Not active Set Capillary 4000 V Set Dry Heater 200 °C  
 Scan Begin 50 m/z Set End Plate -500 V Set Dry Gas 8.0 l/min  
 Scan End 1500 m/z Set Charging 2000 V Set Divert Valve Waste  
Set Voltage 0 nA Set APCI Heater 0 °C

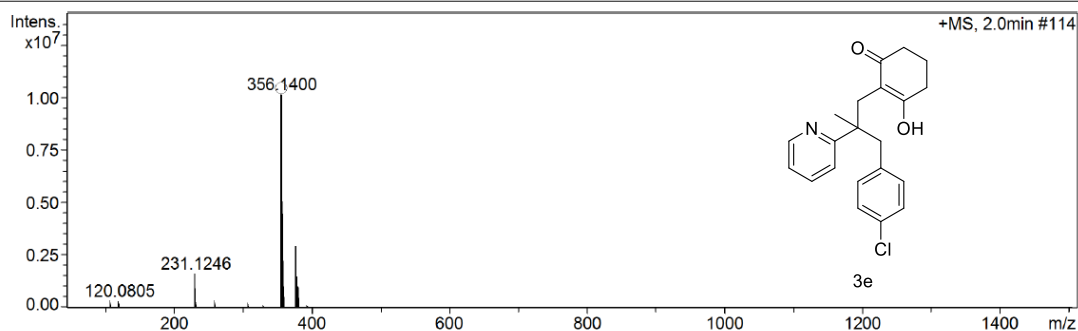

| Meas. m/z | # | Ion Formula | m/z err [ppm] | mSigma | #    | mSigma | Score  | rdb  | e    | ¥ | Conf | N-Rule |
|-----------|---|-------------|---------------|--------|------|--------|--------|------|------|---|------|--------|
| 356.1400  | 1 | C21H23ClNO2 | 356.1412      | 3.2    | 51.5 | 1      | 100.00 | 11.0 | even |   | ok   |        |

## Mass Spectrum SmartFormula Report

**Analysis Info** Acquisition D 2022-01-17 22:51:02  
 Analysis Name F:\gaofenbian(xiepengfei)\GHX MS\0114\_BC5\_01\_11130.d  
 Method LC\_NO UV\_P50-1500\_6MIN.m Operator Demo User  
 Sample Name 0114 Instrument compact 8255754.2017  
6

Comment

**Acquisition Paramet**  
 Source Type ESI Ion Polarity Positive Set Nebulizer 3.0 Bar  
 Focus Not active Set Capillary 4000 V Set Dry Heater 200 °C  
 Scan Begin 50 m/z Set End Plate -500 V Set Dry Gas 8.0 l/min  
 Scan End 1500 m/z Set Charging 2000 V Set Divert Valve Waste  
Set Voltage 0 nA Set APCI Heater 0 °C

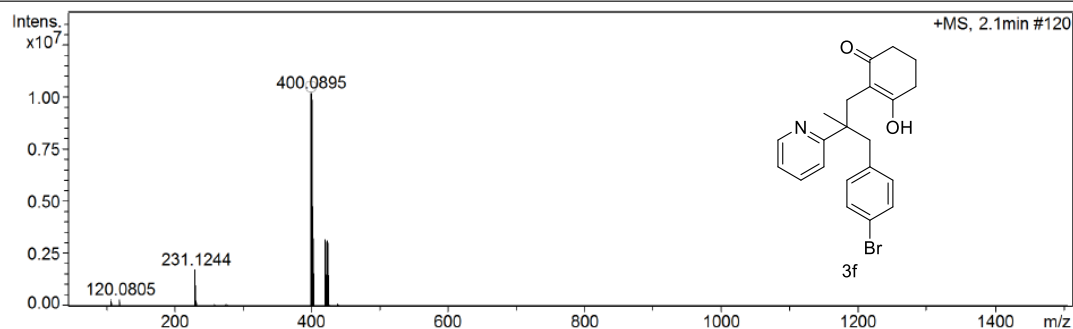

| Meas. m/z | # | Ion Formula | m/z err [ppm] | mSigma | #    | mSigma | Score  | rdb  | e    | ¥ | Conf | N-Rule |
|-----------|---|-------------|---------------|--------|------|--------|--------|------|------|---|------|--------|
| 400.0895  | 1 | C21H23BrNO2 | 400.0907      | 3.0    | 61.7 | 1      | 100.00 | 11.0 | even |   | ok   |        |

## Mass Spectrum SmartFormula Report

Analysis Info Acquisition D 2022-01-17 23:06:32  
Analysis Name F:\gaofenbian(xiepengfei)\GHX MS\0114\_BC7\_01\_11132.d  
Method LC\_NO UV\_P50-1500\_6MIN.m Operator Demo User  
Sample Name 0114 Instrumen compact 8255754.2017  
6

Comment

Acquisition Paramet

|             |            |                 |          |                  |           |
|-------------|------------|-----------------|----------|------------------|-----------|
| Source Type | ESI        | Ion Polarity    | Positive | Set Nebulizer    | 3.0 Bar   |
| Focus       | Not active | Set Capillary   | 4000 V   | Set Dry Heater   | 200 °C    |
| Scan Begin  | 50 m/z     | Set End Plate   | -500 V   | Set Dry Gas      | 8.0 l/min |
| Scan End    | 1500 m/z   | Offset charging | 2000 V   | Set Divert Valve | Waste     |
|             |            | Set Corona      | 0 nA     | Set APCI Heater  | 0 °C      |

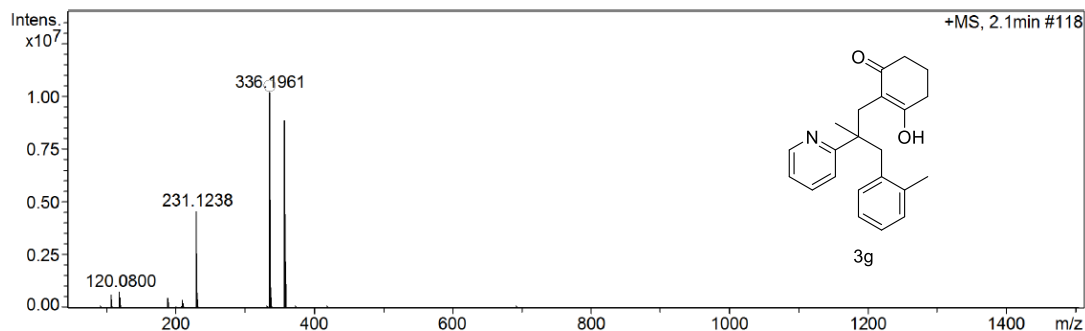

| Meas. m/z | # | Ion Formula | m/z err [ppm] | mSigma | #     | mSigma | Score  | rdb  | e    | ¥ | Conf | N-Rule |
|-----------|---|-------------|---------------|--------|-------|--------|--------|------|------|---|------|--------|
| 336.1961  | 1 | C22H26NO2   | 336.1958      | -0.9   | 286.0 | 1      | 100.00 | 11.0 | even |   | ok   |        |

## Mass Spectrum SmartFormula Report

Analysis Info Acquisition D 2022-01-17 22:20:52  
Analysis Name F:\gaofenbian(xiepengfei)\GHX MS\0114\_BC1\_01\_11126.d  
Method LC\_NO UV\_P50-1500\_6MIN.m Operator Demo User  
Sample Name 0114 Instrumen compact 8255754.2017  
6

Comment

Acquisition Paramet

|             |            |                 |          |                  |           |
|-------------|------------|-----------------|----------|------------------|-----------|
| Source Type | ESI        | Ion Polarity    | Positive | Set Nebulizer    | 3.0 Bar   |
| Focus       | Not active | Set Capillary   | 4000 V   | Set Dry Heater   | 200 °C    |
| Scan Begin  | 50 m/z     | Set End Plate   | -500 V   | Set Dry Gas      | 8.0 l/min |
| Scan End    | 1500 m/z   | Offset charging | 2000 V   | Set Divert Valve | Waste     |
|             |            | Set Corona      | 0 nA     | Set APCI Heater  | 0 °C      |

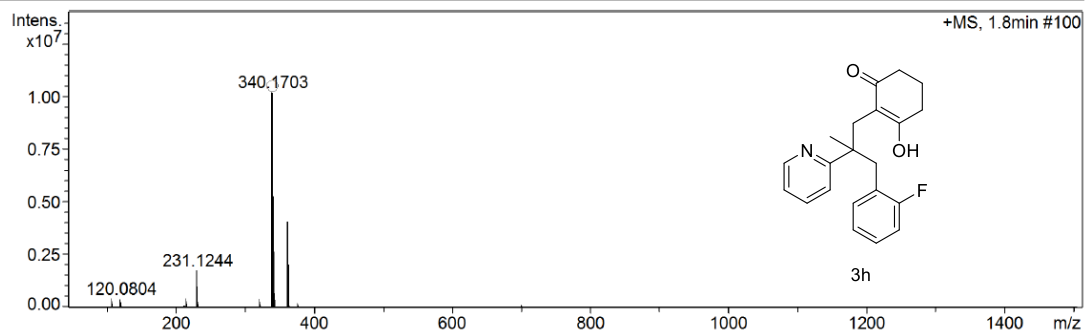

| Meas. m/z | # | Ion Formula | m/z err [ppm] | mSigma | #     | mSigma | Score  | rdb  | e    | ¥ | Conf | N-Rule |
|-----------|---|-------------|---------------|--------|-------|--------|--------|------|------|---|------|--------|
| 340.1703  | 1 | C21H23FNO2  | 340.1707      | 1.3    | 163.9 | 1      | 100.00 | 11.0 | even |   | ok   |        |

## Mass Spectrum SmartFormula Report

**Analysis Info** Acquisition D 2022-01-17 23:14:08  
 Analysis Name F:\gaofenbian(xiepengfei)\GHX MS\0114\_BC8\_01\_11133.d  
 Method LC\_NO UV\_P50-1500\_6MIN.m Operator Demo User  
 Sample Name 0114 Instrument compact 8255754.2017  
6

Comment

| Acquisition Paramet |            |                 |          |                  |           |
|---------------------|------------|-----------------|----------|------------------|-----------|
| Source Type         | ESI        | Ion Polarity    | Positive | Set Nebulizer    | 3.0 Bar   |
| Focus               | Not active | Set Capillary   | 4000 V   | Set Dry Heater   | 200 °C    |
| Scan Begin          | 50 m/z     | Set End Plate   | -500 V   | Set Dry Gas      | 8.0 l/min |
| Scan End            | 1500 m/z   | Offset charging | 2000 V   | Set Divert Valve | Waste     |
|                     |            | Set Corona      | 0 nA     | Set APCI Heater  | 0 °C      |

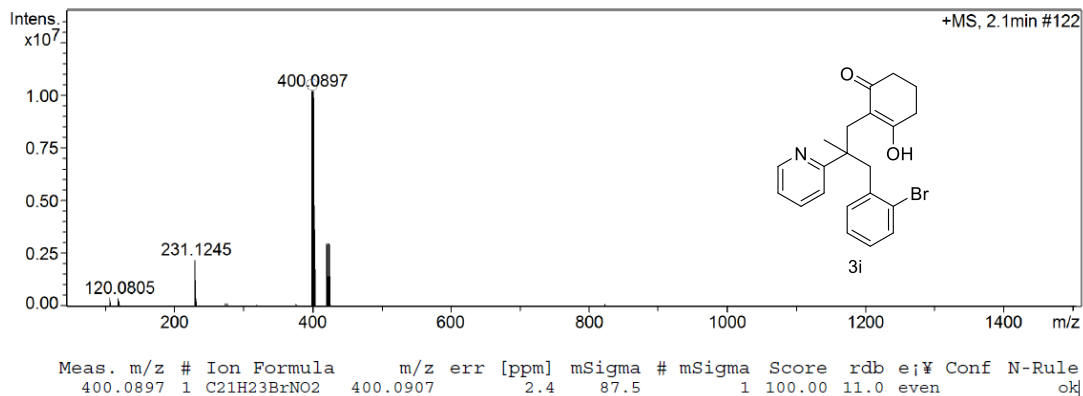

## Mass Spectrum SmartFormula Report

**Analysis Info** Acquisition D 2022-01-17 23:58:18  
 Analysis Name F:\gaofenbian(xiepengfei)\GHX MS\0114\_BD6\_01\_11139.d  
 Method LC\_NO UV\_P50-1500\_6MIN.m Operator Demo User  
 Sample Name 0114 Instrument compact 8255754.2017  
6

Comment

| Acquisition Paramet |            |                 |          |                  |           |
|---------------------|------------|-----------------|----------|------------------|-----------|
| Source Type         | ESI        | Ion Polarity    | Positive | Set Nebulizer    | 3.0 Bar   |
| Focus               | Not active | Set Capillary   | 4000 V   | Set Dry Heater   | 200 °C    |
| Scan Begin          | 50 m/z     | Set End Plate   | -500 V   | Set Dry Gas      | 8.0 l/min |
| Scan End            | 1500 m/z   | Offset charging | 2000 V   | Set Divert Valve | Waste     |
|                     |            | Set Corona      | 0 nA     | Set APCI Heater  | 0 °C      |

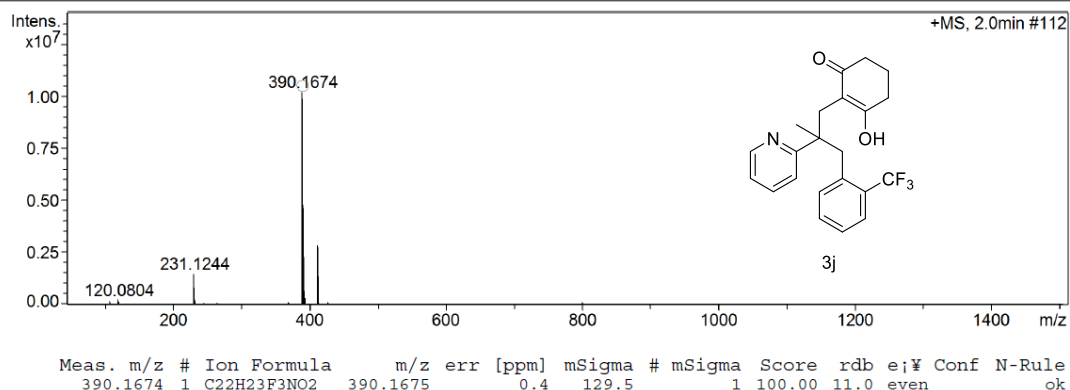

## Mass Spectrum SmartFormula Report

**Analysis Info** Acquisition D 2022-01-18 0:13:14  
 Analysis Name F:\gaofenbian(xiepengfei)\GHX MS\0114\_BD8\_01\_11141.d  
 Method LC\_NO UV\_P50-1500\_6MIN.m Operator Demo User  
 Sample Name 0114 Instrument compact 8255754.2017  
6

Comment

|                            |            |                 |          |                  |           |
|----------------------------|------------|-----------------|----------|------------------|-----------|
| <b>Acquisition Paramet</b> |            |                 |          |                  |           |
| Source Type                | ESI        | Ion Polarity    | Positive | Set Nebulizer    | 3.0 Bar   |
| Focus                      | Not active | Set Capillary   | 4000 V   | Set Dry Heater   | 200 °C    |
| Scan Begin                 | 50 m/z     | Set End Plate   | -500 V   | Set Dry Gas      | 8.0 l/min |
| Scan End                   | 1500 m/z   | Offset charging | 2000 V   | Set Divert Valve | Waste     |
|                            |            | Set Corona      | 0 nA     | Set APCI Heater  | 0 °C      |

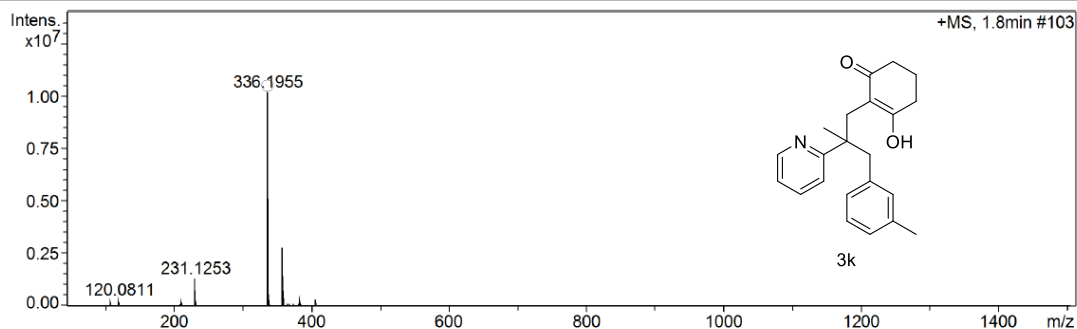

| Meas. m/z | # | Ion Formula | m/z err [ppm] | mSigma | #     | mSigma | Score  | rdb  | e;Y  | Conf | N-Rule |
|-----------|---|-------------|---------------|--------|-------|--------|--------|------|------|------|--------|
| 336.1955  | 1 | C22H26NO2   | 336.1958      | 1.0    | 109.5 | 1      | 100.00 | 11.0 | even |      | ok     |

## Mass Spectrum SmartFormula Report

**Analysis Info** Acquisition D 2022-01-17 22:13:30  
 Analysis Name F:\gaofenbian(xiepengfei)\GHX MS\0114\_BB8\_01\_11125.d  
 Method LC\_NO UV\_P50-1500\_6MIN.m Operator Demo User  
 Sample Name 0114 Instrument compact 8255754.2017  
6

Comment

|                            |            |                 |          |                  |           |
|----------------------------|------------|-----------------|----------|------------------|-----------|
| <b>Acquisition Paramet</b> |            |                 |          |                  |           |
| Source Type                | ESI        | Ion Polarity    | Positive | Set Nebulizer    | 3.0 Bar   |
| Focus                      | Not active | Set Capillary   | 4000 V   | Set Dry Heater   | 200 °C    |
| Scan Begin                 | 50 m/z     | Set End Plate   | -500 V   | Set Dry Gas      | 8.0 l/min |
| Scan End                   | 1500 m/z   | Offset charging | 2000 V   | Set Divert Valve | Waste     |
|                            |            | Set Corona      | 0 nA     | Set APCI Heater  | 0 °C      |

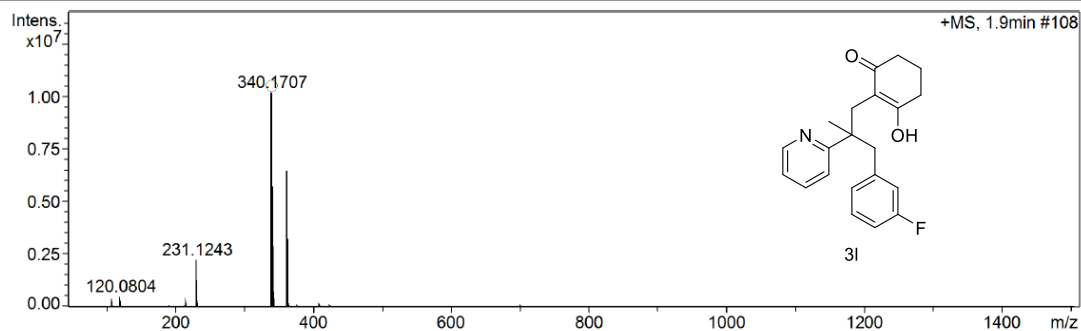

| Meas. m/z | # | Ion Formula | m/z err [ppm] | mSigma | #     | mSigma | Score  | rdb  | e;Y  | Conf | N-Rule |
|-----------|---|-------------|---------------|--------|-------|--------|--------|------|------|------|--------|
| 340.1707  | 1 | C21H23FNO2  | 340.1707      | 0.1    | 190.9 | 1      | 100.00 | 11.0 | even |      | ok     |



## Mass Spectrum SmartFormula Report

**Analysis Info** Acquisition D 2022-01-17 22:35:32  
 Analysis Name F:\gaofenbian(xiepengfei)\GHX MS\0114\_BC3\_01\_11128.d  
 Method LC\_NO UV\_P50-1500\_6MIN.m Operator Demo User  
 Sample Name 0114 Instrument compact 8255754.2017

Comment

| Acquisition Paramet |            |                 |          |                  |           |
|---------------------|------------|-----------------|----------|------------------|-----------|
| Source Type         | ESI        | Ion Polarity    | Positive | Set Nebulizer    | 3.0 Bar   |
| Focus               | Not active | Set Capillary   | 4000 V   | Set Dry Heater   | 200 °C    |
| Scan Begin          | 50 m/z     | Set End Plate   | -500 V   | Set Dry Gas      | 8.0 l/min |
| Scan End            | 1500 m/z   | Offset charging | 2000 V   | Set Divert Valve | Waste     |
|                     |            | Set Corona      | 0 nA     | Set APCI Heater  | 0 °C      |

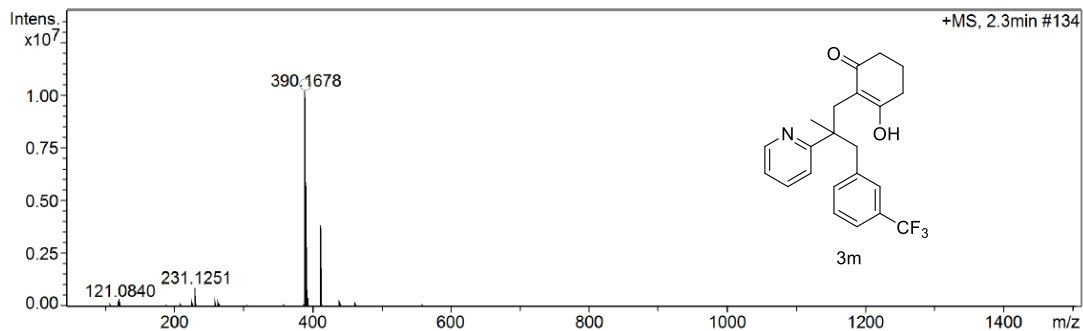

| Meas. m/z | # | Ion Formula | m/z err [ppm] | mSigma | #     | mSigma | Score  | rdb  | e    | Y | Conf | N-Rule |
|-----------|---|-------------|---------------|--------|-------|--------|--------|------|------|---|------|--------|
| 390.1678  | 1 | C22H23F3NO2 | 390.1675      | -0.6   | 194.2 | 1      | 100.00 | 11.0 | even |   |      | ok     |

## Mass Spectrum SmartFormula Report

**Analysis Info** Acquisition D 2022-04-01 10:19:11  
 Analysis Name F:\gaofenbian(xiepengfei)\0331\_RE6\_01\_12400.d  
 Method LC\_NO UV\_P50-1500\_6MIN.m Operator Demo User  
 Sample Name 0331 Instrument compact 8255754.2017

Comment

| Acquisition Paramet |            |                 |          |                  |           |
|---------------------|------------|-----------------|----------|------------------|-----------|
| Source Type         | ESI        | Ion Polarity    | Positive | Set Nebulizer    | 3.0 Bar   |
| Focus               | Not active | Set Capillary   | 4000 V   | Set Dry Heater   | 200 °C    |
| Scan Begin          | 50 m/z     | Set End Plate   | -500 V   | Set Dry Gas      | 8.0 l/min |
| Scan End            | 1500 m/z   | Offset charging | 2000 V   | Set Divert Valve | Waste     |
|                     |            | Set Corona      | 0 nA     | Set APCI Heater  | 0 °C      |

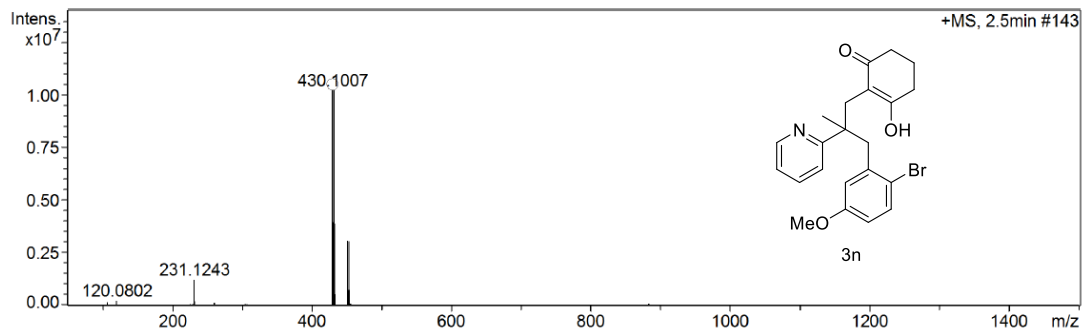

| Meas. m/z | # | Ion Formula | m/z err [ppm] | mSigma | #    | mSigma | Score  | rdb  | e    | Y | Conf | N-Rule |
|-----------|---|-------------|---------------|--------|------|--------|--------|------|------|---|------|--------|
| 430.1007  | 1 | C22H25BrNO3 | 430.1012      | 1.4    | 90.3 | 1      | 100.00 | 11.0 | even |   |      | ok     |

## Mass Spectrum SmartFormula Report

Analysis Info Acquisition D 2022-01-17 23:21:30  
Analysis Name F:\gaofenbian(xiepengfei)\GHX MS\0114\_BD1\_01\_11134.d  
Method LC\_NO UV\_P50-1500\_6MIN.m Operator Demo User  
Sample Name 0114 Instrumen compact 8255754.2017  
6

Comment

Acquisition Paramet  
Source Type ESI Ion Polarity Positive Set Nebulizer 3.0 Bar  
Focus Not active Set Capillary 4000 V Set Dry Heater 200 °C  
Scan Begin 50 m/z Set End Plate -500 V Set Dry Gas 8.0 l/min  
Scan End 1500 m/z Offcharging 2000 V Set Divert Valve Waste  
Voltage 0 nA Set APCI Heater 0 °C

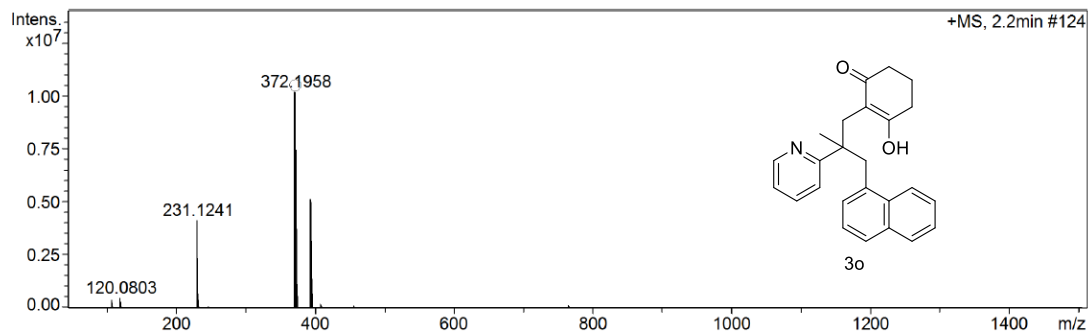

| Meas. m/z | # | Ion Formula | m/z      | err [ppm] | mSigma | # | mSigma | Score | rdb  | e | ¥ | Conf | N-Rule |
|-----------|---|-------------|----------|-----------|--------|---|--------|-------|------|---|---|------|--------|
| 372.1958  | 1 | C25H26NO2   | 372.1958 | 0.0       | 265.5  | 1 | 100.00 | 14.0  | even |   |   | ok   |        |

## Mass Spectrum SmartFormula Report

Analysis Info Acquisition D 2022-01-17 23:36:11  
Analysis Name F:\gaofenbian(xiepengfei)\GHX MS\0114\_BD3\_01\_11136.d  
Method LC\_NO UV\_P50-1500\_6MIN.m Operator Demo User  
Sample Name 0114 Instrumen compact 8255754.2017  
6

Comment

Acquisition Paramet  
Source Type ESI Ion Polarity Positive Set Nebulizer 3.0 Bar  
Focus Not active Set Capillary 4000 V Set Dry Heater 200 °C  
Scan Begin 50 m/z Set End Plate -500 V Set Dry Gas 8.0 l/min  
Scan End 1500 m/z Offcharging 2000 V Set Divert Valve Waste  
Voltage 0 nA Set APCI Heater 0 °C

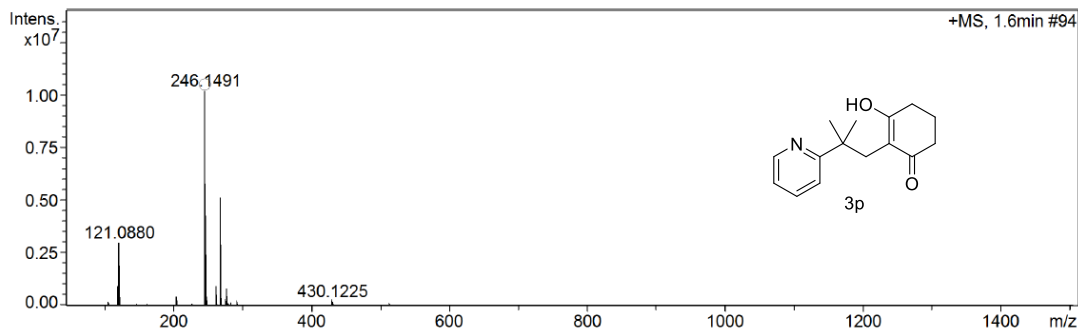

| Meas. m/z | # | Ion Formula | m/z      | err [ppm] | mSigma | # | mSigma | Score | rdb  | e | ¥ | Conf | N-Rule |
|-----------|---|-------------|----------|-----------|--------|---|--------|-------|------|---|---|------|--------|
| 246.1491  | 1 | C15H20NO2   | 246.1489 | -1.0      | 146.1  | 1 | 100.00 | 7.0   | even |   |   | ok   |        |

## Mass Spectrum SmartFormula Report

**Analysis Info** Acquisition D 2022-01-17 22:28:11  
 Analysis Name F:\gaofenbian(xiepengfei)\GHX MS\0114\_BC2\_01\_11127.d  
 Method LC\_NO UV\_P50-1500\_6MIN.m Operator Demo User  
 Sample Name 0114 Instrument compact 8255754.2017  
6

Comment

**Acquisition Paramet**  
 Source Type ESI Ion Polarity Positive Set Nebulizer 3.0 Bar  
 Focus Not active Set Capillary 4000 V Set Dry Heater 200 °C  
 Scan Begin 50 m/z Set End Plate -500 V Set Dry Gas 8.0 l/min  
 Scan End 1500 m/z Offset charging 2000 V Set Divert Valve Waste  
Voltage 0 nA Set APCI Heater 0 °C

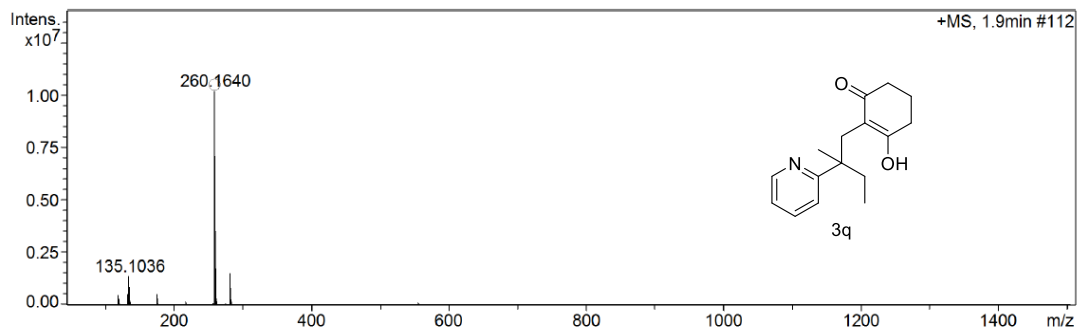

| Meas. m/z | # | Ion Formula | m/z err [ppm] | mSigma | #    | mSigma | Score  | rdb | ej   | Y | Conf | N-Rule |
|-----------|---|-------------|---------------|--------|------|--------|--------|-----|------|---|------|--------|
| 260.1640  | 1 | C16H22NO2   | 260.1645      | 1.9    | 62.0 | 1      | 100.00 | 7.0 | even |   |      | ok     |

## Mass Spectrum SmartFormula Report

**Analysis Info** Acquisition D 2022-01-18 0:05:52  
 Analysis Name F:\gaofenbian(xiepengfei)\GHX MS\0114\_BD7\_01\_11140.d  
 Method LC\_NO UV\_P50-1500\_6MIN.m Operator Demo User  
 Sample Name 0114 Instrument compact 8255754.2017  
6

Comment

**Acquisition Paramet**  
 Source Type ESI Ion Polarity Positive Set Nebulizer 3.0 Bar  
 Focus Not active Set Capillary 4000 V Set Dry Heater 200 °C  
 Scan Begin 50 m/z Set End Plate -500 V Set Dry Gas 8.0 l/min  
 Scan End 1500 m/z Offset charging 2000 V Set Divert Valve Waste  
Voltage 0 nA Set APCI Heater 0 °C

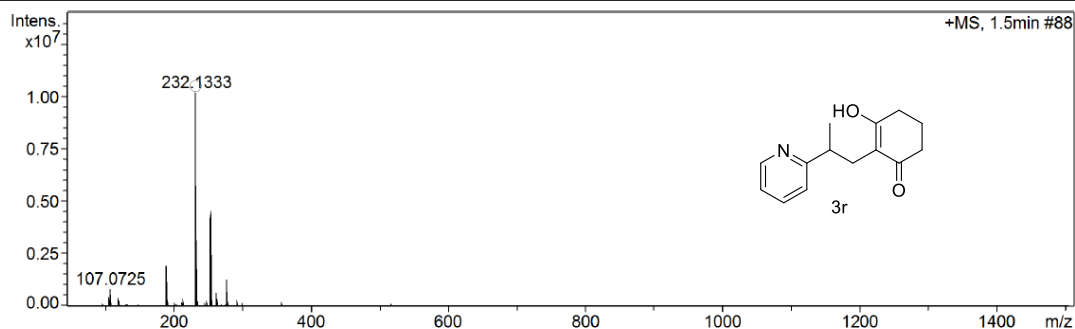

| Meas. m/z | # | Ion Formula | m/z err [ppm] | mSigma | #    | mSigma | Score  | rdb | ej   | Y | Conf | N-Rule |
|-----------|---|-------------|---------------|--------|------|--------|--------|-----|------|---|------|--------|
| 232.1333  | 1 | C14H18NO2   | 232.1332      | -0.5   | 88.5 | 1      | 100.00 | 7.0 | even |   |      | ok     |

## Mass Spectrum SmartFormula Report

Analysis Info Acquisition D 2022-01-17 23:28:52  
Analysis Name F:\gaofenbian(xiepengfei)\GHX MS\0114\_BD2\_01\_11135.d  
Method LC\_NO UV\_P50-1500\_6MIN.m Operator Demo User  
Sample Name 0114 Instrument compact 8255754.2017  
6

Comment

### Acquisition Paramet

|             |            |               |          |                  |           |
|-------------|------------|---------------|----------|------------------|-----------|
| Source Type | ESI        | Ion Polarity  | Positive | Set Nebulizer    | 3.0 Bar   |
| Focus       | Not active | Set Capillary | 4000 V   | Set Dry Heater   | 200 °C    |
| Scan Begin  | 50 m/z     | Set End Plate | -500 V   | Set Dry Gas      | 8.0 l/min |
| Scan End    | 1500 m/z   | Set Charging  | 2000 V   | Set Divert Valve | Waste     |
|             |            | Set Corona    | 0 nA     | Set APCI Heater  | 0 °C      |

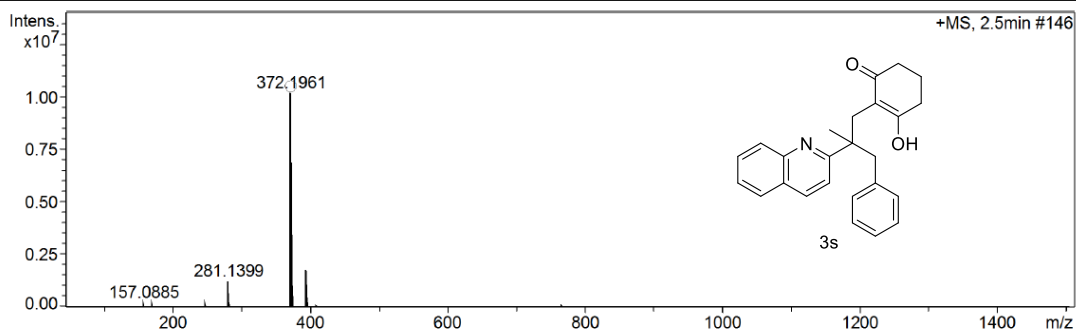

| Meas. m/z | # | Ion Formula                                      | m/z err [ppm] | mSigma | # | mSigma | Score | rdb  | e | Y | Conf | N-Rule |
|-----------|---|--------------------------------------------------|---------------|--------|---|--------|-------|------|---|---|------|--------|
| 372.1961  | 1 | C <sub>25</sub> H <sub>26</sub> N <sub>2</sub> O | -0.8          | 231.4  | 1 | 100.00 | 14.0  | even |   |   | ok   |        |

## Mass Spectrum SmartFormula Report

Analysis Info Acquisition D 2022-01-17 22:58:23  
Analysis Name F:\gaofenbian(xiepengfei)\GHX MS\0114\_BC6\_01\_11131.d  
Method LC\_NO UV\_P50-1500\_6MIN.m Operator Demo User  
Sample Name 0114 Instrument compact 8255754.2017  
6

Comment

### Acquisition Paramet

|             |            |               |          |                  |           |
|-------------|------------|---------------|----------|------------------|-----------|
| Source Type | ESI        | Ion Polarity  | Positive | Set Nebulizer    | 3.0 Bar   |
| Focus       | Not active | Set Capillary | 4000 V   | Set Dry Heater   | 200 °C    |
| Scan Begin  | 50 m/z     | Set End Plate | -500 V   | Set Dry Gas      | 8.0 l/min |
| Scan End    | 1500 m/z   | Set Charging  | 2000 V   | Set Divert Valve | Waste     |
|             |            | Set Corona    | 0 nA     | Set APCI Heater  | 0 °C      |

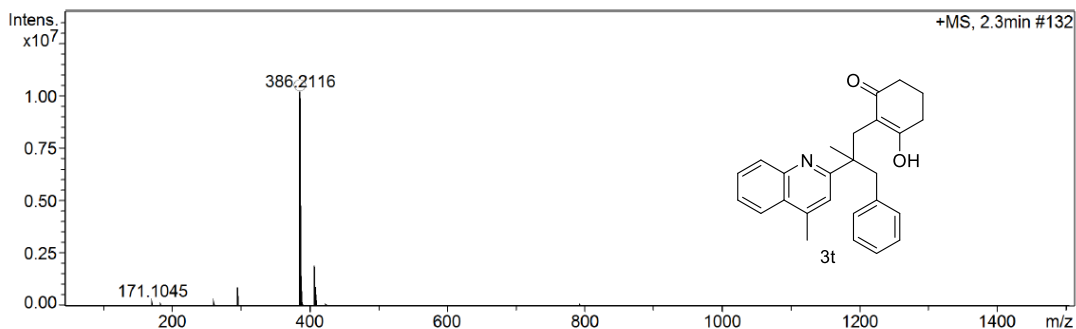

| Meas. m/z | # | Ion Formula                                      | m/z err [ppm] | mSigma | # | mSigma | Score | rdb  | e | Y | Conf | N-Rule |
|-----------|---|--------------------------------------------------|---------------|--------|---|--------|-------|------|---|---|------|--------|
| 386.2116  | 1 | C <sub>26</sub> H <sub>28</sub> N <sub>2</sub> O | -0.4          | 368.5  | 1 | 100.00 | 14.0  | even |   |   | ok   |        |

## Mass Spectrum SmartFormula Report

Analysis Info Acquisition D 2022-04-01 10:04:14  
Analysis Name F:\gaofenbian(xiepengfei)\0331\_RE4\_01\_12398.d  
Method LC\_NO UV\_P50-1500\_6MIN.m Operator Demo User  
Sample Name 0331 Instrument compact 8255754.2017  
6

Comment

Acquisition Paramet  
Source Type ESI Ion Polarity Positive Set Nebulizer 3.0 Bar  
Focus Not active Set Capillary 4000 V Set Dry Heater 200 °C  
Scan Begin 50 m/z Set End Plate -500 V Set Dry Gas 8.0 l/min  
Scan End 1500 m/z Offcharging 2000 V Set Divert Valve Waste  
Voltage 0 nA Set APCI Heater 0 °C

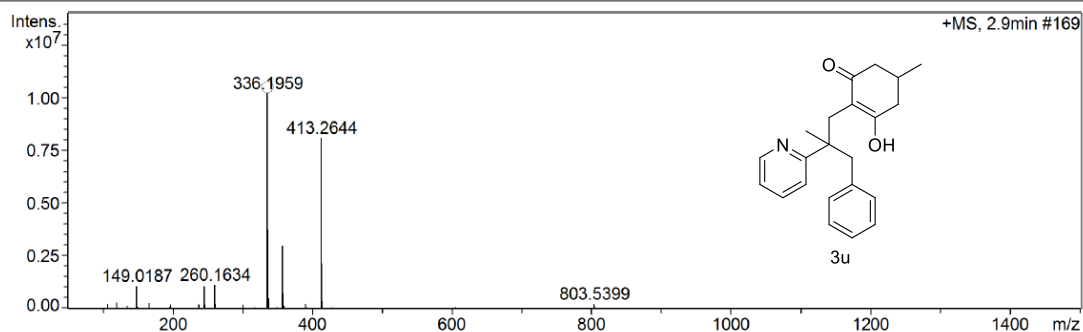

| Meas. m/z | # | Ion Formula | m/z err [ppm] | mSigma | #    | mSigma | Score  | rdb  | ej   | Conf | N-Rule |
|-----------|---|-------------|---------------|--------|------|--------|--------|------|------|------|--------|
| 336.1959  | 1 | C22H26NO2   | 336.1958      | -0.1   | 71.1 | 1      | 100.00 | 11.0 | even |      | ok     |

## Mass Spectrum SmartFormula Report

Analysis Info Acquisition D 2022-04-01 9:39:34  
Analysis Name F:\gaofenbian(xiepengfei)\0331\_RE1\_01\_12395.d  
Method LC\_NO UV\_P50-1500\_6MIN.m Operator Demo User  
Sample Name 0331 Instrument compact 8255754.2017  
6

Comment

Acquisition Paramet  
Source Type ESI Ion Polarity Positive Set Nebulizer 3.0 Bar  
Focus Not active Set Capillary 4000 V Set Dry Heater 200 °C  
Scan Begin 50 m/z Set End Plate -500 V Set Dry Gas 8.0 l/min  
Scan End 1500 m/z Offcharging 2000 V Set Divert Valve Waste  
Voltage 0 nA Set APCI Heater 0 °C

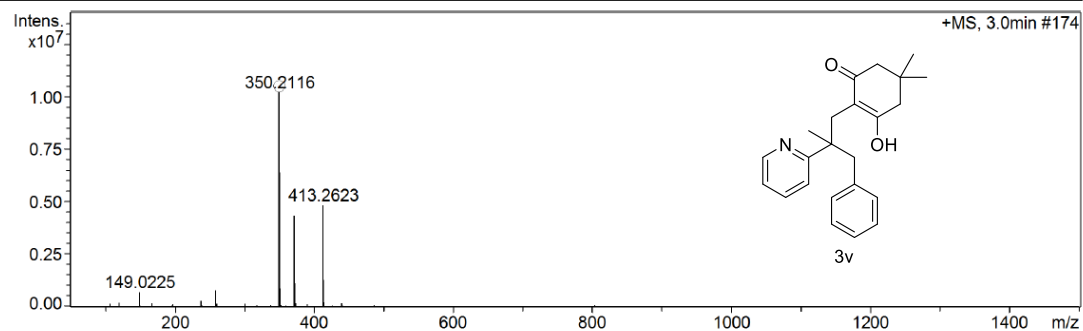

| Meas. m/z | # | Ion Formula | m/z err [ppm] | mSigma | #     | mSigma | Score  | rdb  | ej   | Conf | N-Rule |
|-----------|---|-------------|---------------|--------|-------|--------|--------|------|------|------|--------|
| 350.2116  | 1 | C23H28NO2   | 350.2115      | -0.4   | 215.9 | 1      | 100.00 | 11.0 | even |      | ok     |

## Mass Spectrum SmartFormula Report

**Analysis Info** Acquisition D 2022-04-01 9:31:42  
 Analysis Name F:\gaofenbian(xiepengfei)\0331\_RD8\_01\_12394.d  
 Method LC\_NO UV\_P50-1500\_6MIN.m Operator Demo User  
 Sample Name 0331 Instrument compact 8255754.2017  
6

Comment

**Acquisition Paramet**  
 Source Type ESI Ion Polarity Positive Set Nebulizer 3.0 Bar  
 Focus Not active Set Capillary 4000 V Set Dry Heater 200 °C  
 Scan Begin 50 m/z Set End Plate -500 V Set Dry Gas 8.0 l/min  
 Scan End 1500 m/z Set Charging 2000 V Set Divert Valve Waste  
Set Voltage 0 nA Set APCI Heater 0 °C

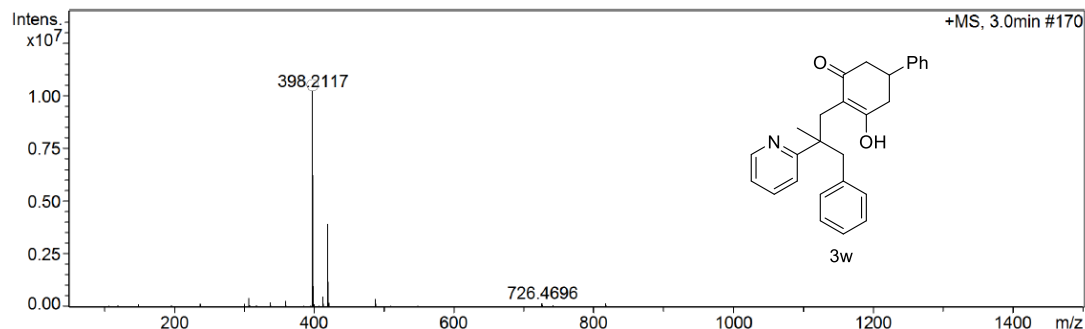

| Meas. m/z | # | Ion Formula | m/z      | err [ppm] | mSigma | # | mSigma | Score | rdb  | ej | Conf | N-Rule |
|-----------|---|-------------|----------|-----------|--------|---|--------|-------|------|----|------|--------|
| 398.2117  | 1 | C27H28NO2   | 398.2115 | -0.6      | 182.7  | 1 | 100.00 | 15.0  | even |    | ok   | ok     |
|           | 1 | C27H28NO2   | 398.2115 | -0.6      | 182.7  | 1 | 100.00 | 15.0  | even |    | ok   | ok     |

## Mass Spectrum SmartFormula Report

**Analysis Info** Acquisition D 2022-04-01 10:27:04  
 Analysis Name F:\gaofenbian(xiepengfei)\0331\_RE7\_01\_12401.d  
 Method LC\_NO UV\_P50-1500\_6MIN.m Operator Demo User  
 Sample Name 0331 Instrument compact 8255754.2017  
6

Comment

**Acquisition Paramet**  
 Source Type ESI Ion Polarity Positive Set Nebulizer 3.0 Bar  
 Focus Not active Set Capillary 4000 V Set Dry Heater 200 °C  
 Scan Begin 50 m/z Set End Plate -500 V Set Dry Gas 8.0 l/min  
 Scan End 1500 m/z Set Charging 2000 V Set Divert Valve Waste  
Set Voltage 0 nA Set APCI Heater 0 °C

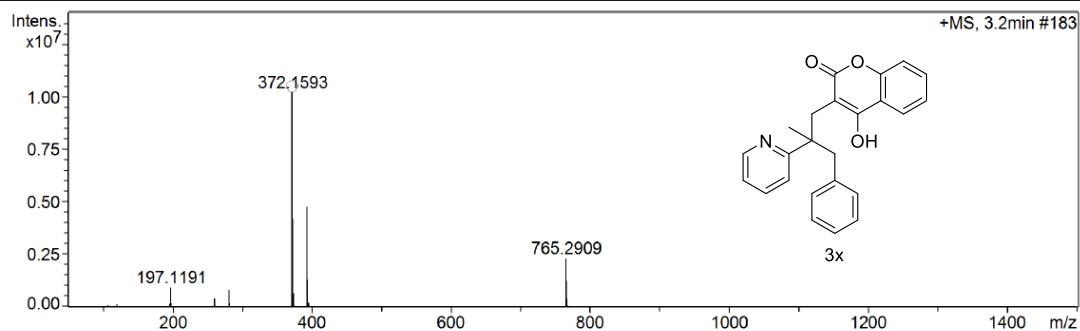

| Meas. m/z | # | Ion Formula | m/z      | err [ppm] | mSigma | # | mSigma | Score | rdb  | ej | Conf | N-Rule |
|-----------|---|-------------|----------|-----------|--------|---|--------|-------|------|----|------|--------|
| 372.1593  | 1 | C24H22NO3   | 372.1594 | 0.4       | 85.3   | 1 | 100.00 | 15.0  | even |    | ok   | ok     |

## Mass Spectrum SmartFormula Report

**Analysis Info**

Analysis Name F:\gaofenbian(xiepengfei)\0331\_RD6\_01\_12392.d  
 Method LC\_NO UV\_P50-1500\_6MIN.m  
 Sample Name 0331

Acquisition D 2022-04-01 9:16:42  
 Operator Demo User  
 Instrument compact 8255754.2017  
 6

**Comment**

**Acquisition Paramet**

|             |            |               |          |                  |           |
|-------------|------------|---------------|----------|------------------|-----------|
| Source Type | ESI        | Ion Polarity  | Positive | Set Nebulizer    | 3.0 Bar   |
| Focus       | Not active | Set Capillary | 4000 V   | Set Dry Heater   | 200 °C    |
| Scan Begin  | 50 m/z     | Set End Plate | -500 V   | Set Dry Gas      | 8.0 l/min |
| Scan End    | 1500 m/z   | Set Charging  | 2000 V   | Set Divert Valve | Waste     |
|             |            | Set Corona    | 0 nA     | Set APCI Heater  | 0 °C      |

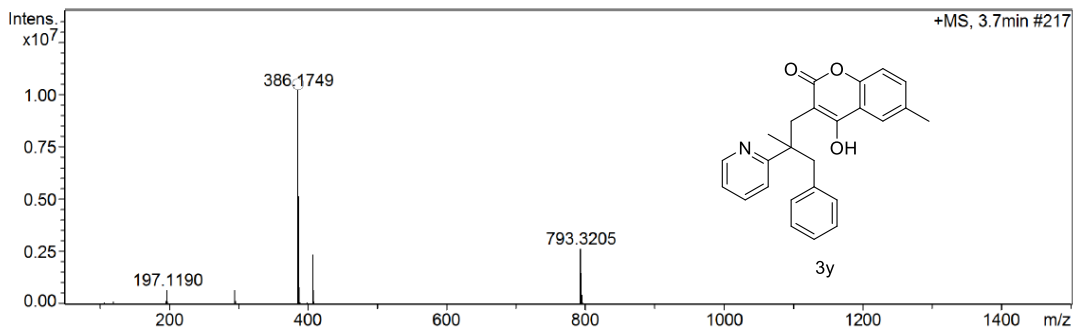

| Meas. m/z | # | Ion Formula | m/z err [ppm] | mSigma | #     | mSigma | Score  | rdb  | ej   | ¥ | Conf | N-Rule |
|-----------|---|-------------|---------------|--------|-------|--------|--------|------|------|---|------|--------|
| 386.1749  | 1 | C25H24NO3   | 386.1751      | 0.5    | 132.5 | 1      | 100.00 | 15.0 | even |   | ok   |        |

## Mass Spectrum SmartFormula Report

**Analysis Info**

Analysis Name F:\gaofenbian(xiepengfei)\0331\_RD7\_01\_12393.d  
 Method LC\_NO UV\_P50-1500\_6MIN.m  
 Sample Name 0331

Acquisition D 2022-04-01 9:24:04  
 Operator Demo User  
 Instrument compact 8255754.2017  
 6

**Comment**

**Acquisition Paramet**

|             |            |               |          |                  |           |
|-------------|------------|---------------|----------|------------------|-----------|
| Source Type | ESI        | Ion Polarity  | Positive | Set Nebulizer    | 3.0 Bar   |
| Focus       | Not active | Set Capillary | 4000 V   | Set Dry Heater   | 200 °C    |
| Scan Begin  | 50 m/z     | Set End Plate | -500 V   | Set Dry Gas      | 8.0 l/min |
| Scan End    | 1500 m/z   | Set Charging  | 2000 V   | Set Divert Valve | Waste     |
|             |            | Set Corona    | 0 nA     | Set APCI Heater  | 0 °C      |

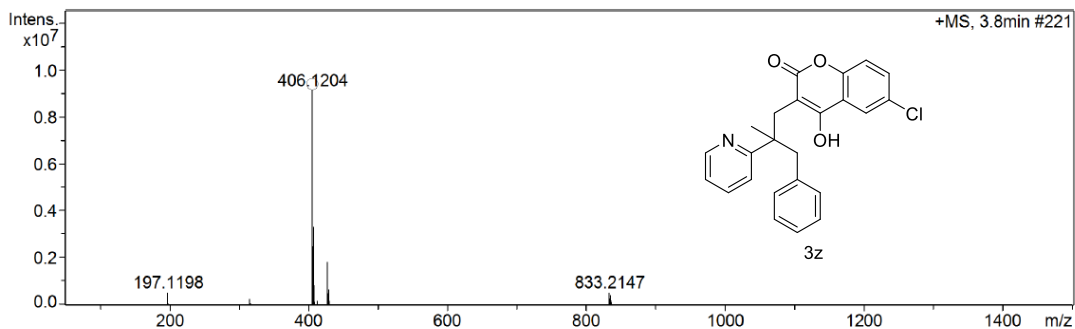

| Meas. m/z | # | Ion Formula | m/z err [ppm] | mSigma | #   | mSigma | Score  | rdb  | ej   | ¥ | Conf | N-Rule |
|-----------|---|-------------|---------------|--------|-----|--------|--------|------|------|---|------|--------|
| 406.1204  | 1 | C24H21ClNO3 | 406.1204      | 0.1    | 4.3 | 1      | 100.00 | 15.0 | even |   | ok   |        |

## Mass Spectrum SmartFormula Report

**Analysis Info**

Analysis Name F:\gaofenbian(xiepengfei)\0331\_RE3\_01\_12397.d  
 Method LC\_NO UV\_P50-1500\_6MIN.m  
 Sample Name 0331

Acquisition D 2022-04-01 9:55:50  
 Operator Demo User  
 Instrument compact 8255754.2017  
 6

**Comment**
**Acquisition Paramet**

|             |            |               |          |                  |           |
|-------------|------------|---------------|----------|------------------|-----------|
| Source Type | ESI        | Ion Polarity  | Positive | Set Nebulizer    | 3.0 Bar   |
| Focus       | Not active | Set Capillary | 4000 V   | Set Dry Heater   | 200 °C    |
| Scan Begin  | 50 m/z     | Set End Plate | -500 V   | Set Dry Gas      | 8.0 l/min |
| Scan End    | 1500 m/z   | Set Charging  | 2000 V   | Set Divert Valve | Waste     |
|             |            | Set Corona    | 0 nA     | Set APCI Heater  | 0 °C      |

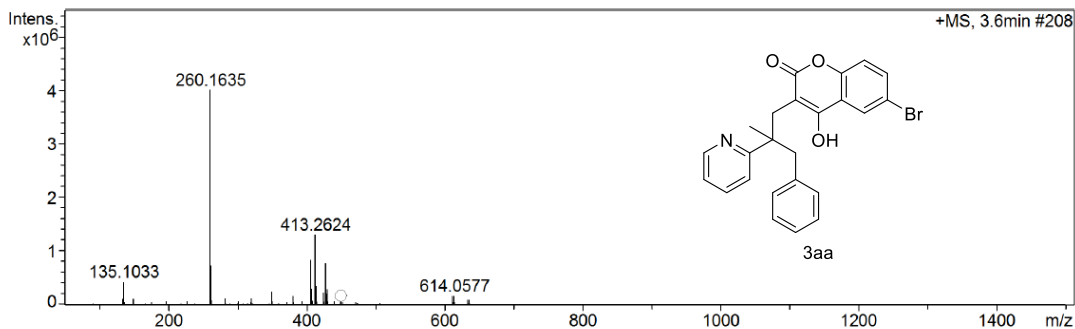

| Meas. m/z | # | Ion Formula                                       | m/z err [ppm] | mSigma | # | mSigma | Score | rdb  | e | Y | Conf | N-Rule |
|-----------|---|---------------------------------------------------|---------------|--------|---|--------|-------|------|---|---|------|--------|
| 450.0700  | 1 | C <sub>24</sub> H <sub>21</sub> BrNO <sub>3</sub> | -0.2          | 76.9   | 1 | 100.00 | 15.0  | even |   |   |      | ok     |

## Mass Spectrum SmartFormula Report

**Analysis Info**

Analysis Name F:\gaofenbian(xiepengfei)\0331\_RD5\_01\_12391.d  
 Method LC\_NO UV\_P50-1500\_6MIN.m  
 Sample Name 0331

Acquisition D 2022-04-01 9:08:33  
 Operator Demo User  
 Instrument compact 8255754.2017  
 6

**Comment**
**Acquisition Paramet**

|             |            |               |          |                  |           |
|-------------|------------|---------------|----------|------------------|-----------|
| Source Type | ESI        | Ion Polarity  | Positive | Set Nebulizer    | 3.0 Bar   |
| Focus       | Not active | Set Capillary | 4000 V   | Set Dry Heater   | 200 °C    |
| Scan Begin  | 50 m/z     | Set End Plate | -500 V   | Set Dry Gas      | 8.0 l/min |
| Scan End    | 1500 m/z   | Set Charging  | 2000 V   | Set Divert Valve | Waste     |
|             |            | Set Corona    | 0 nA     | Set APCI Heater  | 0 °C      |

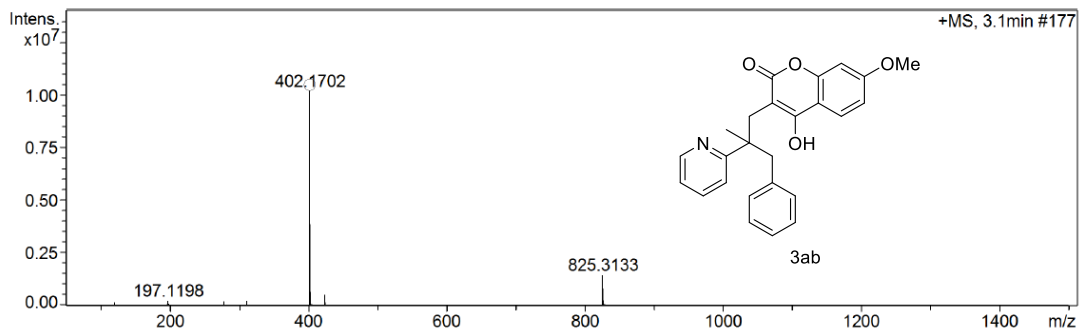

| Meas. m/z | # | Ion Formula                                     | m/z err [ppm] | mSigma | # | mSigma | Score | rdb  | e | Y | Conf | N-Rule |
|-----------|---|-------------------------------------------------|---------------|--------|---|--------|-------|------|---|---|------|--------|
| 402.1702  | 1 | C <sub>25</sub> H <sub>24</sub> NO <sub>4</sub> | -0.6          | 59.0   | 1 | 100.00 | 15.0  | even |   |   |      | ok     |



## Mass Spectrum SmartFormula Report

Analysis Info Acquisition D 2022-01-18 0:27:57  
Analysis Name F:\gaofenbian(xiepengfei)\GHX MS\0114\_BE2\_01\_11143.d  
Method LC\_NO UV\_P50-1500\_6MIN.m Operator Demo User  
Sample Name 0114 Instrumen compact 8255754.2017  
6

Comment

Acquisition Paramet  
Source Type ESI Ion Polarity Positive Set Nebulizer 3.0 Bar  
Focus Not active Set Capillary 4000 V Set Dry Heater 200 °C  
Scan Begin 50 m/z Set End Plate -500 V Set Dry Gas 8.0 l/min  
Scan End 1500 m/z ~~Off~~charging 2000 V Set Divert Valve Waste  
~~Set~~ ~~Source~~ 0 nA Set APCI Heater 0 °C

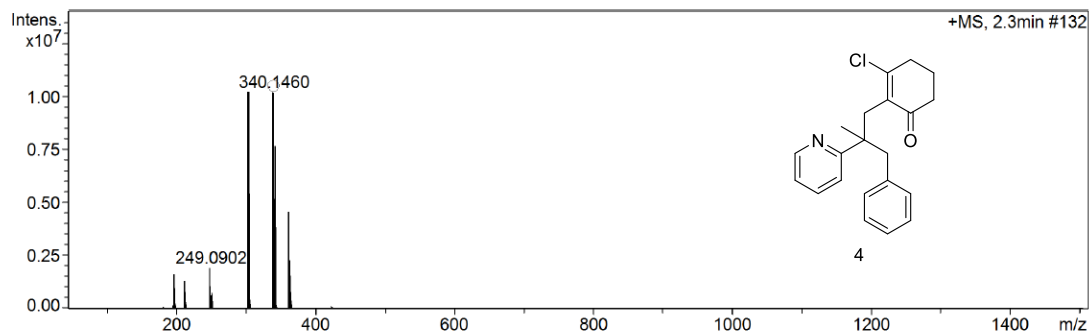

| Meas. m/z | # | Ion Formula | m/z err [ppm] | mSigma | #     | mSigma | Score  | rdb  | e    | Y | Conf | N-Rule |
|-----------|---|-------------|---------------|--------|-------|--------|--------|------|------|---|------|--------|
| 340.1460  | 1 | C21H23ClNO  | 340.1463      | 0.7    | 221.3 | 1      | 100.00 | 11.0 | even |   |      | ok     |

## Mass Spectrum SmartFormula Report

Analysis Info Acquisition D 2022-04-06 9:45:50  
Analysis Name g:\Desktop\aa\0404\_GD3\_01\_12544.d  
Method LC\_NO UV\_P50-1500\_6MIN.m Operator Demo User  
Sample Name 0404 Instrumen compact 8255754.2017  
6

Comment

Acquisition Paramet  
Source Type ESI Ion Polarity Positive Set Nebulizer 3.0 Bar  
Focus Not active Set Capillary 4000 V Set Dry Heater 200 °C  
Scan Begin 50 m/z Set End Plate -500 V Set Dry Gas 8.0 l/min  
Scan End 1500 m/z ~~Off~~charging 2000 V Set Divert Valve Waste  
~~Set~~ ~~Source~~ 0 nA Set APCI Heater 0 °C

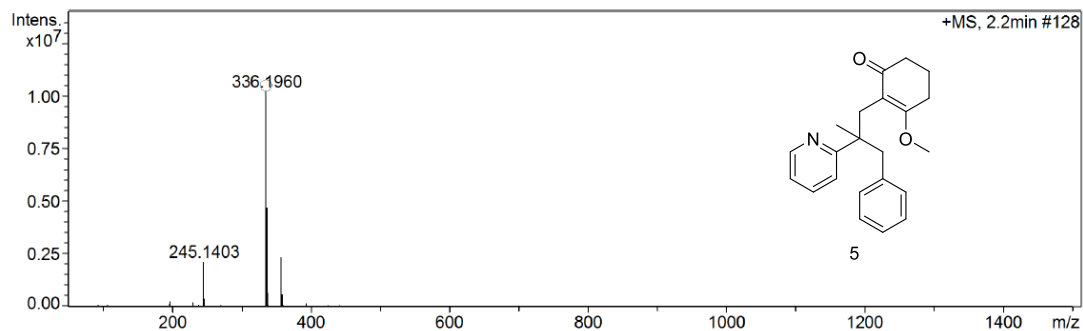

| Meas. m/z | # | Ion Formula | m/z err [ppm] | mSigma | #     | mSigma | Score  | rdb  | e    | Y | Conf | N-Rule |
|-----------|---|-------------|---------------|--------|-------|--------|--------|------|------|---|------|--------|
| 336.1960  | 1 | C22H26NO2   | 336.1958      | -0.5   | 125.9 | 1      | 100.00 | 11.0 | even |   |      | ok     |

# Mass Spectrum SmartFormula Report

**Analysis Info**

Analysis Name: g:\Desktop\aa\0404\_GD4\_01\_12545.d  
 Method: LC\_NO UV\_P50-1500\_6MIN.m  
 Sample Name: 0404

Acquisition D 2022-04-06 9:53:43

Operator: Demo User  
 Instrument: compact 8255754.2017  
 6

**Comment**

**Acquisition Paramet**

|             |            |                 |          |                  |           |
|-------------|------------|-----------------|----------|------------------|-----------|
| Source Type | ESI        | Ion Polarity    | Positive | Set Nebulizer    | 3.0 Bar   |
| Focus       | Not active | Set Capillary   | 4000 V   | Set Dry Heater   | 200 °C    |
| Scan Begin  | 50 m/z     | Set End Plate   | -500 V   | Set Dry Gas      | 8.0 l/min |
| Scan End    | 1500 m/z   | Offset charging | 2000 V   | Set Divert Valve | Waste     |
|             |            | Set Corona      | 0 nA     | Set APCI Heater  | 0 °C      |

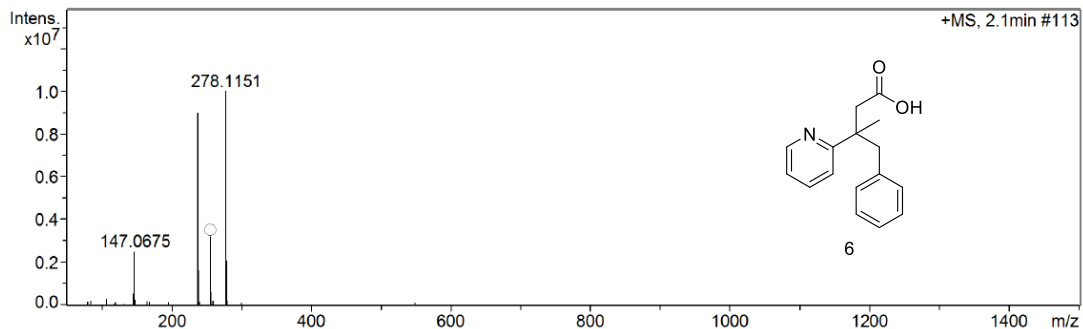

| Meas. m/z | # | Ion Formula | m/z err [ppm] | mSigma | #   | mSigma | Score  | rdb | e    | Y | Conf | N-Rule |
|-----------|---|-------------|---------------|--------|-----|--------|--------|-----|------|---|------|--------|
| 256.1328  | 1 | C16H18NO2   | 256.1332      | 1.7    | 1.3 | 1      | 100.00 | 9.0 | even |   |      | ok     |
